1 **Proteomic studies of human placentas reveal partnerships associated with**  
2 **preeclampsia, diabetes, gravidity, and labor**

3  
4 **Shannon J. Ho<sup>1,10</sup>, Dale Chaput<sup>2,10</sup>, Rachel G. Sinkey<sup>1</sup>, Amanda H. Garces<sup>3</sup>, Erika P.**  
5 **New<sup>1</sup>, Maja Okuka<sup>1</sup>, Peng Sang<sup>4</sup>, Sefa Arlier<sup>1</sup>, Nihan Semerci<sup>1</sup>, Thora S. Steffensen<sup>5</sup>,**  
6 **Thomas J. Rutherford<sup>1,6</sup>, Angel E. Alsina<sup>7</sup>, Jianfeng Cai<sup>4</sup>, Matthew L. Anderson<sup>1,6</sup>,**  
7 **Ronald R. Magness<sup>1</sup>, Vladimir N. Uversky<sup>8</sup>, Derek A. T. Cummings<sup>9</sup> & John C. M.**  
8 **Tsibris<sup>1,8</sup> ✉**

9 <sup>1</sup>Department of Obstetrics and Gynecology, University of South Florida, Tampa, Florida,  
10 USA. <sup>2</sup>Department of Cell Biology, Microbiology and Molecular Biology, University of South  
11 Florida, Tampa, Florida, USA. <sup>3</sup>Lisa Muma Weitz Microscopy Laboratory, University of  
12 South Florida, USA. <sup>4</sup>Department of Chemistry, University of South Florida, Tampa,  
13 Florida, USA. <sup>5</sup>Department of Pathology, Tampa General Hospital, Tampa, Florida, USA.  
14 <sup>6</sup>Cancer Center, Tampa General Hospital, Tampa, Florida, USA. <sup>7</sup>Transplant Surgery  
15 Center, Tampa General Hospital, Tampa, Florida, USA. <sup>8</sup>Department of Molecular  
16 Medicine, University of South Florida, Tampa, Florida, USA. <sup>9</sup>Department of Biology and  
17 Emerging Pathogens Institute, University of Florida, Gainesville, FL, USA. <sup>10</sup>These authors  
18 contributed equally. ✉e-mail: [tsibris@usf.edu](mailto:tsibris@usf.edu)

19  
20  
21  
22

23 **Abstract**

24

25 **VEGFR2 is a central regulator of placental angiogenesis. The study of the VEGFR2**

26 **proteome of chorionic villi at term revealed its partners MDMX and PICALM. The**

27 **oxytocin receptor (OT-R) and vasopressin V1aR receptor were detected in MDMX**

28 **and PICALM immunoprecipitations. Immunogold electron microscopy showed**

29 **VEGFR2 on endothelial cell (EC) nuclei, mitochondria, and Hofbauer cells (HC), the**

30 **tissue-resident macrophages. MDMX, PICALM, and V1aR were on EC plasma**

31 **membranes, nuclei, and HC nuclei. Unexpectedly, PICALM and OT-R were detected**

32 **on EC projections into the fetal lumen and OT-R on 20-150 nm clusters therein,**

33 **prompting the hypothesis that placental exosomes transport OT-R to the fetus and**

34 **across the blood-brain barrier. Insights on gestational complications were gained**

35 **by univariable and multivariable regression analyses associating preeclampsia with**

36 **lower MDMX protein levels in membrane extracts of chorionic villi, and lower MDMX,**

37 **PICALM, OT-R, and V1aR with spontaneous vaginal deliveries compared to**

38 **cesarean deliveries before labor. We found select associations between higher**

39 **MDMX, PICALM, OT-R and either gravidity, diabetes, BMI, maternal age, or neonatal**

40 **weight, and correlations between PICALM-OT-R ( $p < 2.7 \times 10^{-8}$ ), PICALM-V1aR**

41 **( $p < 0.006$ ), and OT-R-V1aR ( $p < 0.001$ ). These results offer for exploration new**

42 **partnerships in metabolic networks, tissue-resident immunity, and labor, notably**

43 **for HC that predominantly express MDMX.**

44

45

46 The placenta is a transient organ that performs the functions of major organs of the fetus,  
47 such as lungs, liver, and kidney<sup>1</sup>, supplies the fetus and in particular the fetal brain with  
48 oxygen and nutrients, and facilitates waste disposal and provides immune protection<sup>2,3</sup>.  
49 The genomes of placenta and fetus are identical except in cases of confined placental  
50 mosaicism. The vascular endothelial growth factor A (VEGF-A) is a key regulator of  
51 vasculogenesis, angiogenesis and placental growth that acts mainly through VEGFR1 and  
52 VEGFR2, two tyrosine kinase single-pass transmembrane receptors<sup>4-6</sup>.

53 Preeclampsia is a serious complication of human pregnancy occurring in 5-7% of  
54 all gestations with newly-onset hypertension and proteinuria as its primary clinical  
55 characteristics<sup>2,7</sup>. Preeclampsia is a multisystemic syndrome of different subtypes  
56 associated with serious health problems to mother and child even after pregnancy<sup>8</sup>. Lipid  
57 bilayer-enclosed extracellular vehicles (EV) transport extracellular nucleic acids, proteins,  
58 lipids, and metabolites<sup>9-12</sup>. Cancer cells deploy EV to activate VEGF signaling in  
59 endothelial cells<sup>12</sup>. Exosomes are EV measuring 20–150 nm in diameter. Placental-  
60 derived exosomes released in the maternal circulation are associated with pregnancy  
61 disorders and parturition<sup>11</sup>.

62 Tissue-based maps of the human proteome of many organs, including placentas,  
63 have been published,<sup>13-16</sup> but great challenges remain to discover which among the  
64 hundreds of detected proteins regulate key metabolic networks, specifically, during normal  
65 and complicated pregnancies and labor. To obtain such information, we chose to  
66 immunoprecipitate VEGFR2, an ideal target as an extensively documented regulator of  
67 placental angiogenesis. To deploy a wide net for the membrane partners of VEGFR2, we  
68 analyzed the pellets obtained after high-speed centrifugation of chorionic villi  
69 homogenates. Uterine blood in the maternal intervillous space exchanges substances with  
70 fetal blood at the villous tree. Although the villi are physically separated from uterine  
71 blood<sup>1,3</sup>, the pellets contain cells and EV from it. To preserve protein complexes, we  
72 extracted the pellets with ASB-14 (amidodisulfobetaine-14), an efficient non-denaturing  
73 detergent. The extracts were immunoprecipitated with the bait antibody (Ab) charged on  
74 magnetic beads knowing that extraction of membrane proteins from their native  
75 environment could alter their structure and protein links. Mass spectrometry identified  
76 proteins immunoprecipitated with VEGFR2, especially its newly discovered placental

77 partners, the multifunctional MDMX (Double minute 4 protein) and PICALM  
78 (Phosphatidylinositol-binding clathrin assembly protein).

79 MDMX, also known as MDM4 and HDMX, is a zinc-binding protein and a p53  
80 inhibitor acting in coordination with MDM2, a zinc-dependent E3 ubiquitin ligase<sup>17</sup>. MDMX  
81 and MDM2 have numerous p53-independent activities. In preeclampsia, p53 is  
82 upregulated in villous trophoblasts<sup>18</sup>. PICALM is a nuclear and plasma membrane protein  
83 that interacts with phosphatidylinositol to recruit clathrin and adaptor protein-2, initiates  
84 endocytosis of clathrin-coated vesicles, internalizes ligand-receptor complexes, and  
85 participates in iron and cholesterol homeostasis<sup>19,20</sup>. PICALM is a genetic risk factor for  
86 late-onset Alzheimer's disease that participates in amyloid- $\beta$  transcytosis and processing  
87 of amyloid precursor protein (APP). Human placentas express APP and APP-processing  
88 enzymes which are increased in preeclampsia<sup>21</sup>. Oxytocin is a hydrophilic neuropeptide  
89 and Pitocin, a synthetic oxytocin, is prescribed in the USA to induce labor and decrease  
90 postpartum hemorrhage. The oxytocin receptor (OT-R, *OXTR*) is a magnesium-dependent  
91 G protein-coupled receptor<sup>22</sup> that activates a phosphatidylinositol-calcium second  
92 messenger system<sup>23</sup>. OT-R participates in numerous activities ranging from parturition to  
93 lactation and mother-child bonding<sup>22,23</sup>. OT-R functions as a homodimer and in  
94 heterocomplexes with vasopressin receptors V1aR (*AVPR1A*)<sup>24</sup>, V2R, and other  
95 receptors. V1aR is the most abundant among vasoactive receptors in human arteries<sup>25</sup>.

96 Here, among the newly detected partners of VEGFR2 we focused on MDMX and  
97 PICLAM based on their documented biochemical functions, and their partners OT-R and  
98 V1aR. Finding OT-R in exosome-size clusters in the fetal lumen led to the hypothesis that  
99 placental OT-R is carried to the fetus in exosomes, potential transporters of future  
100 therapeutic agents. MDMX, PICALM, OT-R, and V1aR protein levels, estimated by  
101 western blots and relative to an internal control sample, were associated with clinical  
102 characteristics of the 44 patients we studied. Potential insights on the molecular  
103 mechanisms of placental MDMX and PICALM were gained, respectively, from the cancer  
104 and Alzheimer's disease literature.

105

## 106 **Results**

107 **Immunoprecipitations (IP).** Key prerequisite for this study was that VEGFR2 protein  
108 complexes withstood tissue freezing and extraction by ASB-14. Since Blue-Native  
109 electrophoresis (BN) resolves protein mixtures under non-denaturing conditions, we  
110 fractionated placental extracts by BN followed by VEGFR2 immunostaining which  
111 revealed streaks extending up to 800 kDa. VEGFR2 monomers appear at 220 kDa in  
112 western blots. Apparently, ASB-14 stabilized the extracted protein complexes of VEGFR2.  
113 Several proteins described in this study were efficiently extracted by ASB-14 (see  
114 Methods). New VEGFR2 partners, MDMX and PICALM, were also selected for IP.

115 Fig. 1 shows western blots of the fractions eluted from the magnetic beads and  
116 used to select the fraction for mass spectrometric analysis. Representative fractions are  
117 identified by the patient's assigned letter-number code shown on Table 1. Magnetic beads  
118 retained all of the applied VEGFR2 (**A**) as none was detected in the flow-through fraction,  
119 but the MDMX and PICALM antibodies charged on the beads retained only a fraction of  
120 their target protein as shown, respectively, in **E** and **F**. All target proteins were greatly  
121 enriched in the eluted fraction-E relative to the applied placental extract, fraction-X. OT-R  
122 co-immunoprecipitated with MDMX (**G**, right side) and with PICALM (**G**, left side), but not  
123 with VEGFR2 (**D**). V1aR co-immunoprecipitated with MDMX (**H**, left side) and with  
124 PICALM (**H**, right side), but not with VEGFR2 (**C**). Eluted MDMX appeared smaller in the  
125 VEGFR2 IP (**B**) and MDMX IP (**E**), whereas PICALM (**F**), OT-R (**G**) and V1aR (**H**)  
126 appeared larger. The size of eluted VEGFR2 was the same as in the extracts (**A**).

127

128

129

130

131

132

133

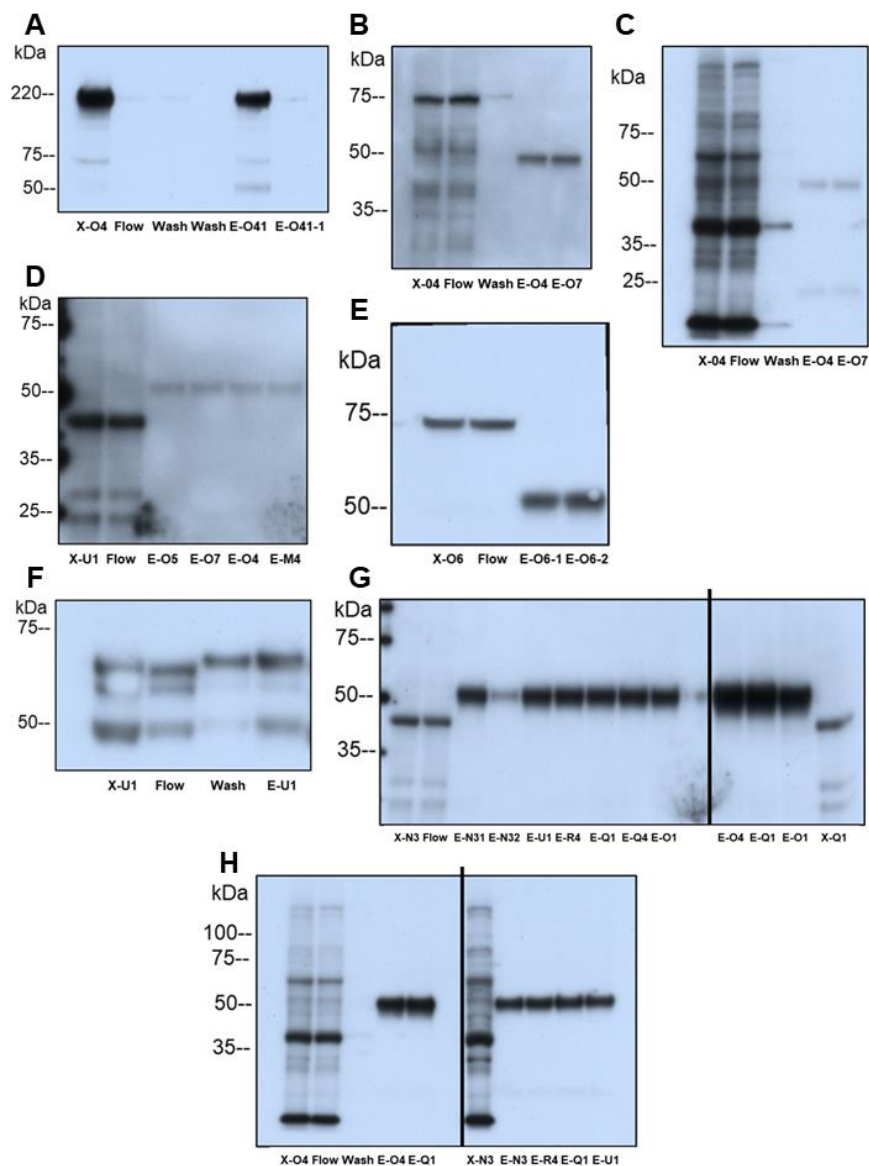

134

135 **Fig. 1. Protein elution profiles in VEGFR2, MDMX and PICALM IP.** Detergent-extracted  
136 villous sample X was incubated with magnetic bead suspension charged with the target  
137 Ab (see Methods). E denotes eluted protein fractions. Western blots detected the target  
138 proteins eluted in the uniformly performed IP experiments. **A.** VEGFR2 in VEGFR2-IP. **B.**  
139 MDMX in VEGFR2-IP. **C.** V1aR in VEGFR2-IP. **D.** OT-R in VEGFR2-IP. **E.** MDMX in  
140 MDMX-IP. **F.** PICALM in PICALM-IP. **G.** Left-side, OT-R in samples from PICALM-IP, and  
141 right-side OT-R in samples from MDMX-IP. **H.** Left-side, V1aR in samples from MDMX-IP,  
142 and right-side samples from PICALM-IP. Panel **C** shows the membrane in **B** reprobed for  
143 V1aR without stripping.

144

145

146 **Proteomic analysis.** Results of the immunoprecipitations of VEGFR2 (samples O4, O5,  
147 O7, U1), MDMX (samples O1, O4, O6, Q1, Q4, R4), and PICALM (samples N3, O1, R4,  
148 Q1, Q4, U1) are listed in Tables 2-4. The peptide coverage was not consistent among the  
149 placental extracts in each immunoprecipitation group due to different clinical  
150 characteristics of the patients whose tissues we tested, and potential differences in post-  
151 translational modifications, such as acetylation, and ubiquitination. Soluble proteins in  
152 villous homogenates having an affinity for membrane proteins would be retained on the  
153 pellets obtained after centrifugation at 100,000g for 1h.

154 **Select proteins that co-immunoprecipitated with VEGFR2 (Table 2).** VEGFR2 was  
155 retained on the beads by an Ab raised to the cytoplasmic tail of VEGFR2 exposing  
156 extracted proteins to its extracellular, VEGF-binding, domain (see Methods). Therefore,  
157 most VEGFR2 partners must have interacted, even after VEGFR2 internalization, with its  
158 extracellular rather than its intracellular tyrosine kinase domain, and in binary associations  
159 while fewer would bind via some intermediate protein partners. In principle, VEGFR2,  
160 MDMX, and PICALM isoforms post-translationally modified at the target sequence of the  
161 immunoprecipitating antibodies, are unlikely to be retained on the beads. Our experimental  
162 design provided only an estimate of peptide levels in each placental sample. Very basic  
163 proteins, such as VEGF-A (pI=9.2), were not detected due to excessive trypsin digestion  
164 of these mostly intrinsically disordered proteins prior to mass spectrometric analysis. For  
165 example, more than 65% of the VEGF-A residues are expected to be disordered.  
166 Nevertheless, western blot analysis showed that VEGF-A co-immunoprecipitated in  
167 VEGFR2 IP, and that OT-R (pI=9.6) and V1aR (pI=9.5) co-immunoprecipitated in MDMX  
168 and PICALM IP. p53 and MDM2 were detected in IP eluates only by western blots. Under  
169 our protocol, proteins larger than 220 kDa were, most likely, identified by peptides from  
170 their smaller forms in the placenta.

171 The E3 ubiquitin ligase TRIM21 (tripartite motif-containing protein 21) co-  
172 immunoprecipitated with VEGFR2 and in MDMX and PICALM IP (Tables 2-4). TRIM21, a  
173 member of the large TRIM family, contains a zinc-binding as well as other motifs. TRIM21  
174 is found in the cytosol and nucleus and is unique among all proteins as the highest-affinity  
175 Fc receptor in humans<sup>26</sup>. TRIM21 does not distinguish free from bound antibodies. Another  
176 VEGFR2 partner was PDC-E2 (*DLAT*), the E2 component of pyruvate dehydrogenase

177 (Table 2). The association of PDC-E2 with VEGFR2 probably occurs in the nuclei<sup>27</sup> and  
178 mitochondria, as discussed later, and is shown in the vasculature of the villi (video). Other  
179 VEGFR2 partners were complement components (Table 2) revealing complement  
180 activation known to occur in placental dysfunctions<sup>28</sup>. Immunoglobulin heavy constant  
181 alpha 1 (*IGHA1*), an autoantibody antigen and signature protein of plasma cells<sup>29</sup>, was  
182 among the large amounts of immunoglobulins detected that are carried by placental  
183 endothelial cells<sup>30</sup> and maternal blood cells. A smaller than 220 kDa form of the giant  
184 protein titin was also detected in VEGFR2 and PICALM IP (Tables 2, 4).

185

#### 186 **Select proteins that co-immunoprecipitated with MDMX and PICALM (Tables 3, 4).**

187 VEGFR2 was not detected in MDMX and PICALM IP, probably because of the limited  
188 binding capacity of the MDMX and PICALM antibody charged on the beads. Among the  
189 proteins that co-immunoprecipitated with MDMX were PICALM, annexins, arginase-1,  
190 RNA-binding protein HNPNA2B1<sup>31</sup> and others that immunoprecipitated also in VEGFR2  
191 and PICALM IP (Tables 2, 4). Protein-glutamine gamma-glutamyltransferase 2 (*TGM2*),  
192 which co-immunoprecipitated with MDMX and PICALM (Tables 3, 4), catalyzes protein  
193 cross-linking, is considered a bridge between inflammation and hypertension, and is  
194 upregulated in preeclampsia<sup>32</sup>. We indicated in Table 3 the few proteins common in  
195 VEGFR2, MDMX and PICALM immunoprecipitations, and many more that co-  
196 immunoprecipitated only with MDMX, likely members of the HC proteome. After an initial  
197 statistical analysis associated MDMX with the mode of delivery, we were prompted to  
198 study the OT-R, which is activated in the myometrium causing uterine contractions<sup>22</sup>, and  
199 its partner V1aR, after validating two commercial antibodies (Figure 10).

200

201 **Immunohistochemistry and whole mount immunofluorescence.** VEGFR2 strongly  
202 stained the endothelium of the villous capillaries (Fig. 2A). TRIM21 staining is seen in the  
203 cytoplasm of villous trophoblasts and stronger staining in intervillous maternal leukocytes  
204 (Fig. 2B, arrows). MDMX is predominantly expressed (Fig. 2, C and D) on Hofbauer cells  
205 (HC)<sup>33-37</sup> that are targets of Zika and other viruses<sup>38</sup>. Strong MDMX staining was limited to  
206 the cytoplasm of HC, easily identified within the villous stroma, some within stromal  
207 channels (Fig. 2C). CD163<sup>33,39</sup>, a marker for placental macrophages<sup>40</sup>, stained the



208 cytoplasm of the HC (Fig. 2D). PICALM showed strong staining of trophoblasts and  
209 syncytiotrophoblasts (Fig. 2E) and on higher power images (Fig. 2F) positive cytoplasmic  
210 staining of the villous capillary endothelial cells was also seen.

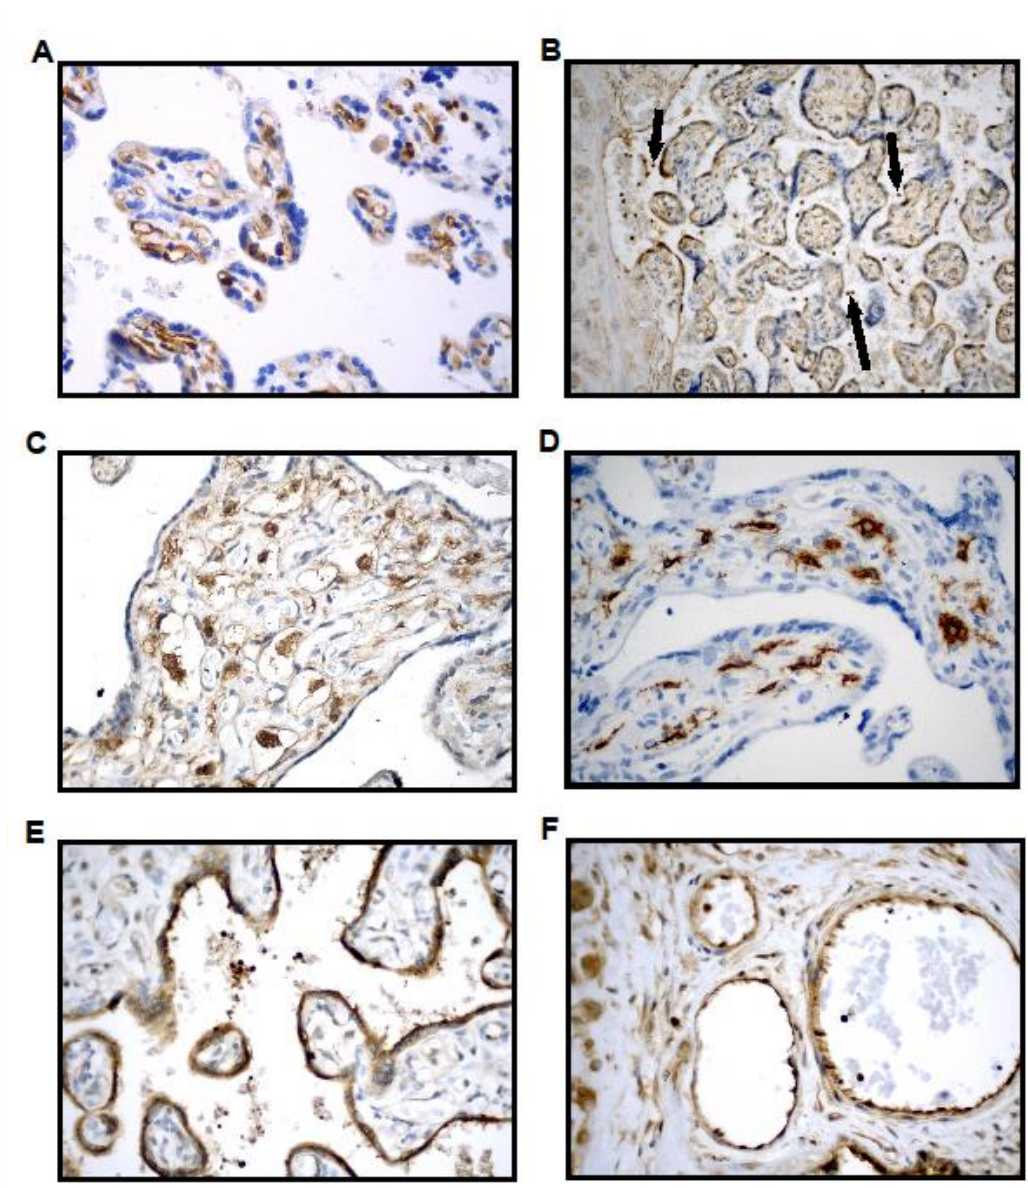

211  
212 **Fig. 2. Immunohistochemical staining of placental sections.** A. VEGFR2  
213 immunostaining is strongly positive in villous endothelial cells (patient Q3). B. TRIM21  
214 is uniformly positive in villous trophoblast (patient N4). Very strong staining is seen of  
215 maternal leukocytes (arrows). C. MDMX is strongly positive in the cytoplasm of HC and  
216 moderately positive in endothelial cells (patient W2). D. CD163 is strongly positive in the  
217 cytoplasm of the HC (patient U1). E. PICALM is strongly positive in the trophoblast (patient  
218 R4). F. PICALM positivity seen in the villous endothelial cells and fetal blood leukocytes  
219 (patient R4). Magnifications in A-F were 10x, 20x and 40x.

220  
221 The co-localization of VEGFR2 (red) and PDC-E2 (green) in endothelial cells of the villous  
222 vasculature of a normotensive patient is shown on the video obtained from reconstructed  
223 stacked images of whole mount immunofluorescence. Nuclei were stained blue with DAPI.

224  
225 **Immunogold electron microscopy (IGEM).** VEGFR2 was localized along segments of  
226 endoplasmic reticulum, and in mitochondria (Fig. 3). MDMX was localized diffusely within  
227 the cytoplasm of an HC and was seen clustering in the nucleus and cytosol. Clusters ran  
228 along the nuclear membrane and appeared associated with mitochondrial and  
229 endoplasmic reticulum membranes (Fig. 4). PICALM was localized to endothelial cell  
230 junctions, along endothelial cell plasma membrane, in cytoplasmic projection into the  
231 lumen and adjacent stroma and fetal blood (Fig. 5). OT-R was detected in endoplasmic  
232 reticulum and cytoplasmic “peninsulas” of endothelial cells extending into the lumen and  
233 on clusters (Fig. 6). V1aR was localized to endothelial cell membrane, nucleus, and  
234 stroma. V1aR was also seen on a fetal RBC (Fig. 7). Details are seen in Figures 3-7.



245 micrograph that detail clusters of VEGFR2 (arrows) in the cytosol (C), along segments of  
246 endoplasmic reticulum (ER), and mitochondria (M). Enlargement of image at bottom right  
247 shows diffuse localization of VEGFR2 clusters throughout the nucleoplasm (arrows). **C.**  
248 Top left micrograph: Villus stroma depicting a fibroblast (Fb), and a pericyte (P) associated  
249 with fetal capillary in partial profile, RBC (E), and EC cytoplasm. Bottom left is enlargement  
250 of area outlined on the top graph and shows fibroblast cytosol, mitochondria (M), and  
251 villous stroma (S). To the right, enlargement of two areas show VEGFR2 in cytoplasm and  
252 in partial profiles of mitochondrial matrix (white arrow heads). **D.** A TEM micrograph after  
253 osmication provided a better outline of mitochondria in an EC, compared to **A**, **B** and **C**  
254 panels. **E.** Fetal capillaries with luminal RBC (E) are shown in the top left image, IS:  
255 intervillous space; mE: maternal RBC. Bottom: enlargement of outlined area shows a fetal  
256 macrophage in greater detail; a syncytiotrophoblast (SCT) is also present. Right  
257 micrograph: enlargement of area in bottom left micrograph, points to VEGFR2 labelling in  
258 an incomplete profile of a mitochondrion. Dashed arrows outline the outer double  
259 membrane of the labeled and unlabeled mitochondria. The gold particle diameter is 6 nm.

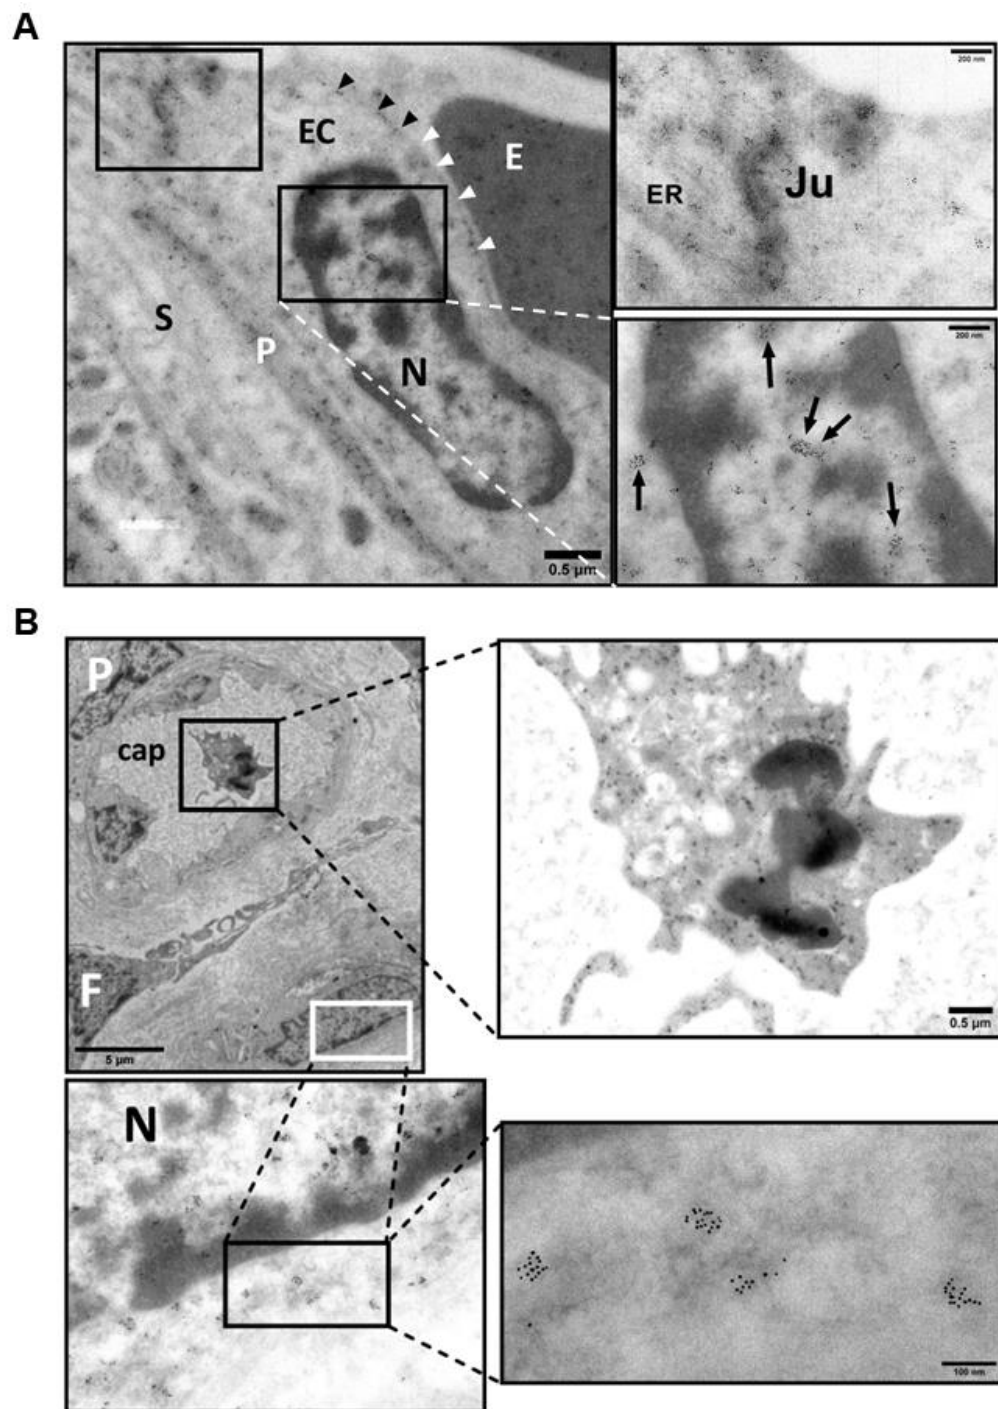

260

261 **Fig. 4. Detection of MDMX by IGEM in chorionic villi of placentas Ho-71**  
262 **(normotensive) and Ho-73 (preeclamptic).** A. Left micrograph: Nucleus (N) of  
263 endothelial cell (EC) from Ho-73. Arrow heads point to small MDMX clusters, parallel to  
264 the inner aspect of the EC plasma membrane. Area outlined, top left: EC junction; P:  
265 pericyte process; E: RBC in capillary lumen, S: stroma. This area is enlarged on the top  
266 right graph and shows MDMX clusters along the junction (Ju), and endoplasmic reticulum

267 (ER). Bottom right: enlargement of outlined area shows diffuse pattern of MDMX clusters  
268 throughout the nucleoplasm. **B.** Top left micrograph shows an outline of apoptotic  
269 macrophage in the lumen of fetal capillary (cap) from Ho-71. P: pericyte, F: partial profile  
270 of fibroblast (F) and HC partially marked by a white outline. Enlargement on the top right  
271 image shows diffuse MDMX localization in the vacuolated cytoplasm of luminal  
272 macrophage. Image at bottom left is enlargement of area outlined in white and shows  
273 MDMX clustering in the nucleus (N) and cytosol of the HC. Clusters, averaging 50-100 nm  
274 in diameter, run along the nuclear membrane and appear to be associated with  
275 mitochondrial and endoplasmic reticulum membranes. Bottom right: enlarged area shows  
276 MDMX clusters of approximately 100 nm. The gold particle diameter is 6 nm.

277

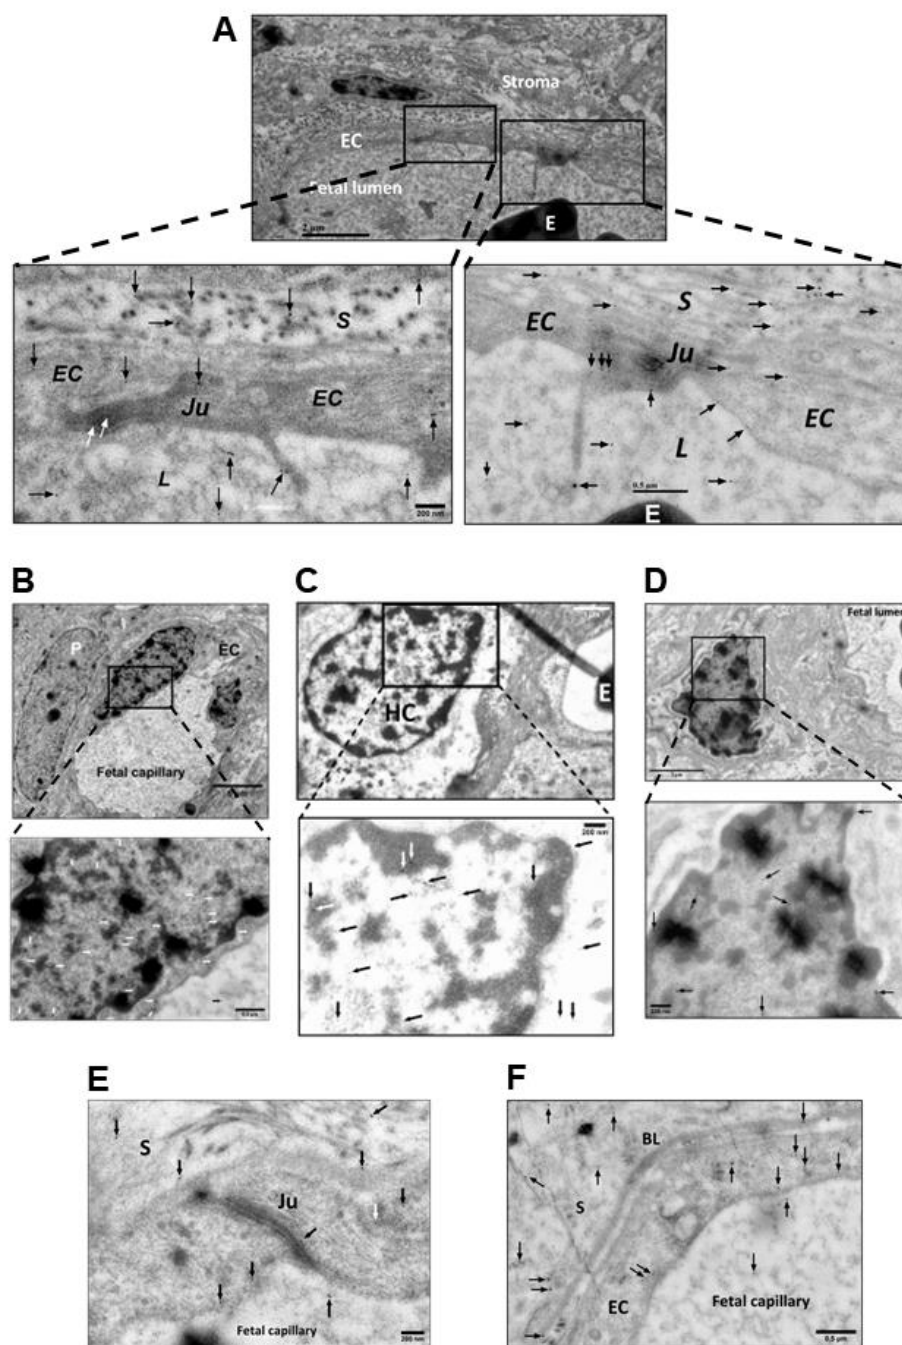

278 **Fig. 5. Detection of PICALM in chorionic villi of placentas Ho-71 (normotensive) and**  
279 **Ho-73 (preeclamptic).** **A.** Top IGEM micrograph: partial profile of villus capillary from Ho-  
280 71. EC: endothelial cells; E: RBC; stroma. Bottom images: enlargement of two selected  
281 areas of endothelium show PICALM localization (arrows) at EC junctions (Ju), along EC  
282 plasma membrane, in cytoplasmic projections into lumen (L) and adjacent stroma (S). **B.**  
283 Top micrograph: the nuclei of endothelium of a villus capillary from Ho-71, and the adjacent  
284 pericyte (P) are patent. Bottom image: enlargement of nucleus, shows PICALM in

285 nucleoplasm near chromatin, on EC cytoplasmic membrane (white arrows) and in luminal  
286 space (black arrow). **C.** Top micrograph: HC in stroma of Ho-73. E: RBC in capillary. At  
287 bottom: enlargement shows PICALM in HC nucleus (arrows). **D.** Top micrograph: HC cell  
288 in the stroma of placenta Ho-71. Bottom image: enlargement shows PICALM in  
289 nucleoplasm in association with chromatin. **E.** PICALM is shown (arrows) at the junction  
290 (Ju), and plasma membrane of EC and in adjacent stroma (S) of fetal capillary from Ho-  
291 73. **F.** PICALM is shown (arrows) in cytoplasm and plasma membrane of EC of capillary  
292 from Ho-71, and in basal lamina (BL), stroma (S) and capillary lumen. The gold particle  
293 diameter is 10 nm.  
294



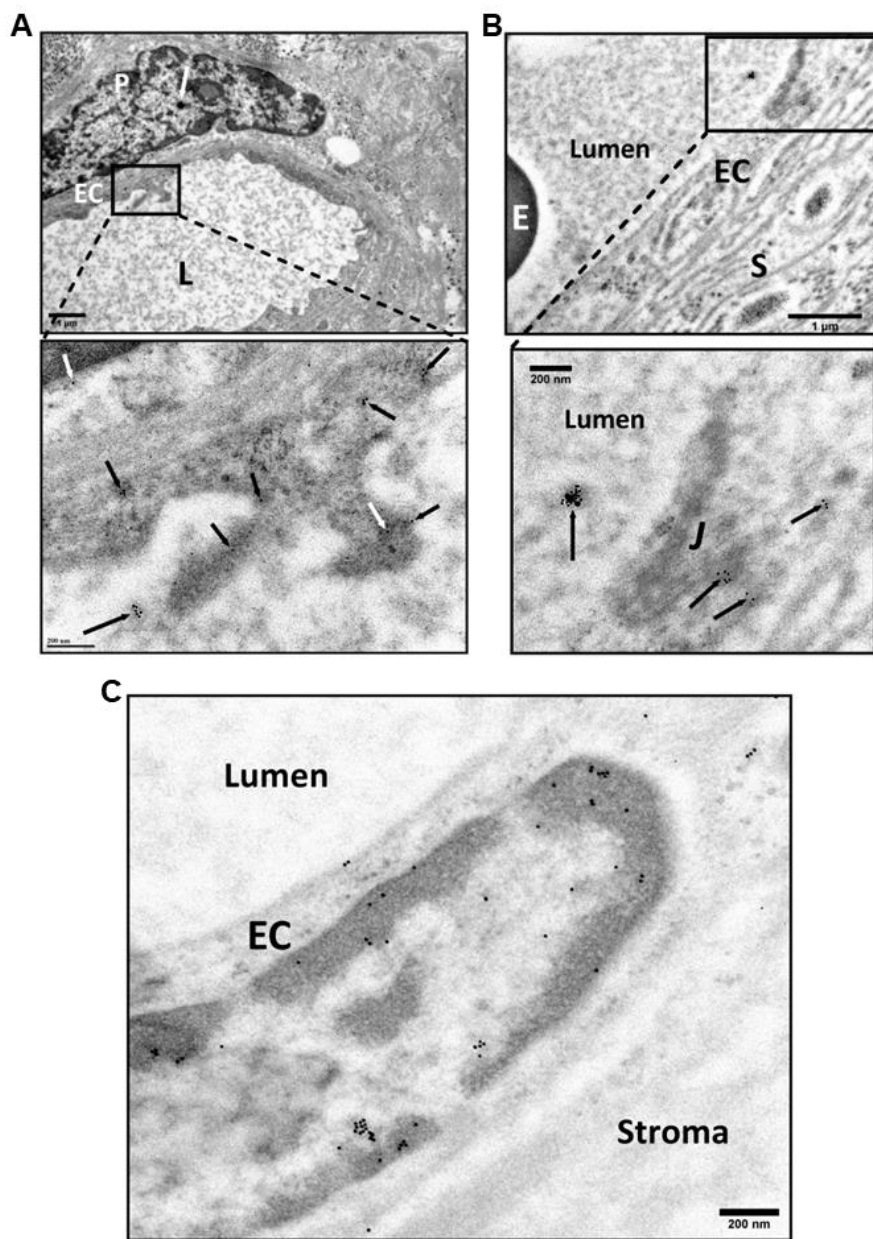

295  
296

297 **Fig. 6. Detection of Oxytocin Receptor (OT-R) in chorionic villi of placentas of**  
298 **normotensive Ho-71, and preeclamptic Ho-73 patients.** **A.** Top IGEM micrograph:  
299 Villus capillary from Ho-71. P: pericyte adjacent to the endothelial cell (EC); L: lumen.  
300 White arrow shows cluster of PICALM on P. Bottom: enlargement shows OT-R in  
301 endoplasmic reticulum (ER) and cytoplasm projections of EC into the lumen. (arrows). **B.**  
302 Top micrograph: Partial view of villus capillary from Ho-73, E: RBC; S: stroma. Bottom  
303 graph shows EC junction (J) and OT-R clusters on J, EC cytoplasm, and lumen (arrow).  
304 **C.** OT-R is seen in the nucleus of an EC from Ho-73. The gold particle diameter is 10 nm.

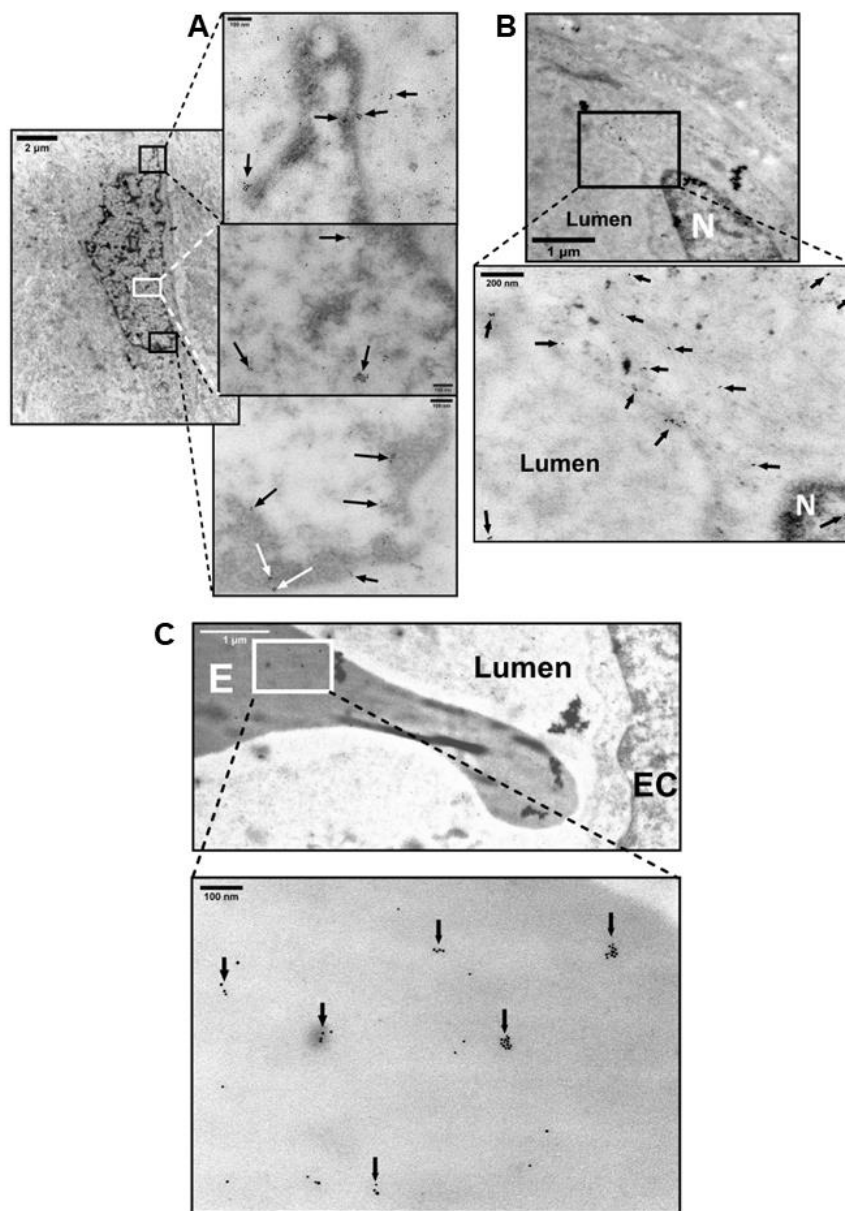

305

306 **Fig. 7. Detection of Vasopressin Receptor V1aR in chorionic villus of placenta Ho-**  
307 **72 (diabetic).** **A.** Composite IGEM image shows nucleus of HC in stroma on the left and  
308 enlargements of three demarcated regions of its nucleus on the right. V1aR clusters, 20-  
309 100 nm, in the nucleus are indicated by arrows. **B.** Top micrograph shows EC aspect of a  
310 villus capillary. Bottom image is enlargement that shows V1aR on EC membrane, nucleus,  
311 and stroma (arrows). **C.** Top micrograph shows aspect of EC of villus capillary; an RBC is  
312 seen in the lumen. Bottom image is enlargement that shows several 20-100 nm clusters  
313 of V1aR on surface of the RBC (arrows). The gold particle diameter is 10 nm.

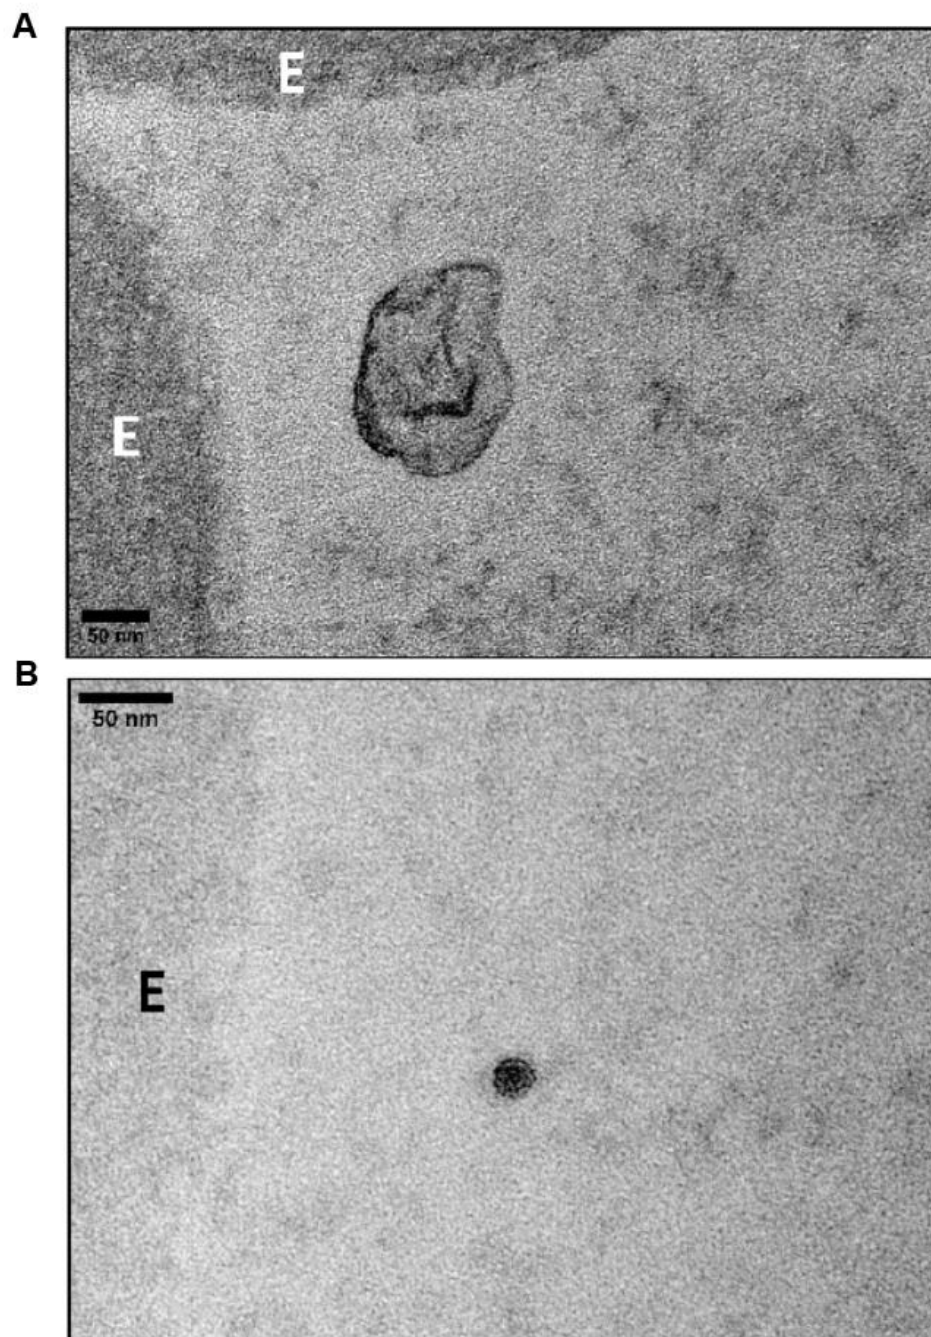

314

315 **Fig. 8. Transmission electron microscopy of osmicated chorionic villus from**  
316 **placenta Ho-73 (preeclamptic). A.** An exosome<sup>9</sup> is shown in the lumen with the  
317 characteristic lipid bilayer adjacent to RBC (E). **B.** A dense particle with a lipid bilayer,  
318 perhaps an exomere<sup>12</sup>, is shown in the lumen next to an RBC (E). Scale in A and B is 50  
319  $\mu\text{m}$ .

320  
321 **Statistical analysis of protein levels in placental extracts.** To estimate the protein  
322 levels of MDMX, PICALM, OT-R and V1aR, we analyzed by western blots 25 µg protein  
323 from each of the 44 placental extracts (Table 1). The intensity of the native-protein band,  
324 shown at the top of the representative western blots in Fig. 9, is relative to an internal  
325 control sample (Q1 or V1) taken as 100% (Table 5). Violin plots show the analysis of the  
326 mean protein levels (Fig. 9) among different clinical conditions. Precluded from the  
327 statistical analysis were VEGFR2, since its protein levels did not differ significantly among  
328 the 44 placentas analyzed in this study, and TRIM21 due to extensive degradation of its  
329 native 50-kDa form in our placental extracts.  
330

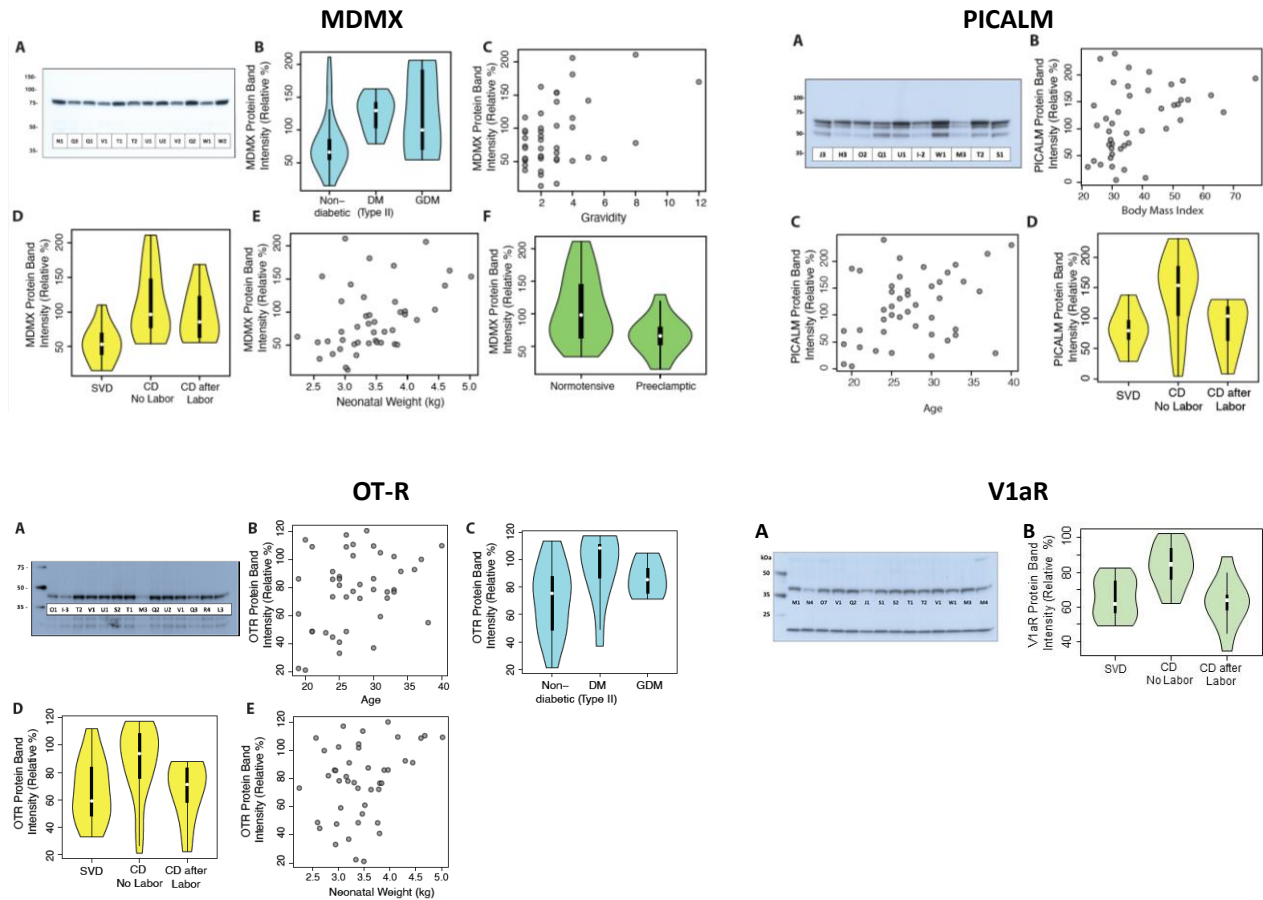

331

332 **Fig. 9. Representative western blots (A) of MDMX, PICALM, OT-R, and V1aR, and**  
 333 **violin plots of their relative protein levels associated with diabetes, gravidity,**  
 334 **neonatal weight, preeclampsia, BMI, or maternal age, as indicated in B-E. Western**  
 335 **blots show the molecular mass (kDa) and the placental extracts identified by a letter-**  
 336 **number code shown in Table 1. Internal control for MDMX and PICALM was sample Q1,**  
 337 **and sample V1 for OT-R and V1aR.**

338 Next, we performed univariable and multivariable analyses, shown in Tables 6-12,  
339 to test whether the mean protein levels of MDMX, PICALM, OT-R and V1aR, represented  
340 by western blot band intensity of placental extracts and relative to an internal reference  
341 sample Q1 or T1, varied as a function of maternal age, gravidity, gestational age, body  
342 mass index, race, preeclampsia, diabetic status, delivery mode, neonatal sex, and  
343 neonatal weight. Preeclamptic patients were compared to non-preeclamptic, and diabetic  
344 to non-diabetic patients.

345 **Univariable analysis of protein levels.** Protein expression units are the percent values  
346 relative to an internal control sample taken as 100% (Table 5).

347 MDMX protein levels were associated with diabetes with an increase of 47.63 units  
348 (95% CI 14.27, 90.00) among those with Type II diabetes and 47.91 (95% CI 5.51, 90.32)  
349 among those with gestational diabetes mellitus (GDM) compared to those without  
350 diabetes, and gravidity with an increase of 9.66 (95% CI 3.59, 15.70) with each unit  
351 increase in gravidity, neonatal weight (an increase of 0.03 (95% CI 0.01, 0.06) for each  
352 increase in grams), and preeclampsia (-44.13 (95% CI -71.63, -16.64). Regarding the  
353 mode of delivery, cesarean delivery, CD, prior to the onset of labor was associated with  
354 an increase of 56.16 (95% CI 24.13, 88.18) compared to those with SVD. See Table 6 for  
355 full results. Recently, CD163 expression in Hofbauer cells was associated with BMI,  
356 gravidity, and fetal birthweight<sup>41</sup>.

357 Increased PICALM levels were associated with maternal age with an increase of  
358 3.68 (95% CI 0.28, 7.08) in intensity for each year increase, and body mass index with an  
359 increase of 2.06 (95% CI 0.66, 3.45) for each unit increase. Regarding the mode of  
360 delivery, CD prior to the onset of labor had an increase of 59.96 (19.24, 100.68) compared  
361 to those with SVD. See Table 7 for full results.

362 OT-R protein levels were associated with maternal age, an increase of 1.56 (95%  
363 CI 0.13, 2.99) for each year of age, and diabetes with an increase of 24.16 (95% CI 5.47,  
364 42.85) among those with Type II diabetes compared to those without diabetes. Neonatal  
365 weight was associated with an increase of 0.01 (95% CI  $8.36 \times 10^{-4}$ , 0.03) for each increase  
366 in grams. See Table 8 for full results.

367 V1aR protein levels were statistically significantly associated with mode of delivery,  
368 CD prior to onset of labor 20.36 (95% CI 10.58, 30.13) compared to SVD. See Table 9 for

369 full results. No associations were found for race, neonatal sex, or gestational age between  
370 35-42 weeks for any outcome.

371  
372 **Multivariable analysis of protein levels.** A multivariable model considered  
373 simultaneously all variables that were statistically significant in univariable analysis.  
374 MDMX protein levels showed a statistically significant association with gravidity 7.19  
375 (95% CI 1.24, 13.14), and preeclampsia -40.61 (95% CI -66.18, -15.04) as shown on Table  
376 10. There were no significant associations for PICALM or OT-R as shown in Tables 11-  
377 12. The best fit model for V1aR included only an intercept (no covariate).

378 To account for the spread in the replicate measurements of MDMX, PICALM, OT-  
379 and V1aR (Table 5), we carried out the bootstrapping analysis shown in Tables 14-19.  
380 The statistical results were robust to bootstrapped resampling (n=1000) of data points  
381 included in the analyses.

382 We also looked at the correlation of MDMX, PICALM, OT-R and V1aR protein levels  
383 with each other and found significant correlations between PICALM and OT-R (0.72 95%  
384 CI 0.54, 0.84,  $p < 2.7 \times 10^{-8}$ ), PICALM and V1aR (0.41 95% CI 0.12, 0.63,  $p < 0.006$ ), and OT-  
385 R and V1aR (0.47 95% CI 0.20, 0.67,  $p < 0.001$ ). MDMX was not correlated with PICALM,  
386 OT-R or V1aR.

## 387 388 **Discussion**

389 Mass spectrometry placed VEGFR2, MDMX and PICALM and their partners in the  
390 molecular landscape of chorionic villi of placentas at term. The co-immunoprecipitated  
391 proteins represent the most prevalent and stable complexes. IGEM provided a detailed  
392 map of VEGFR2, MDMX, PICALM, OT-R and V1aR in the villi, and hints about protein  
393 traffic, specifically, of placental exosomes transporting OT-R to the fetus. In future studies,  
394 IGEM can show if two proteins are within 10-20 Å of each other, with secondary antibodies  
395 labeled with gold particles of different size<sup>42</sup>, such as 6 nm and 12 nm, even though larger  
396 particles may occasionally eclipse the smaller ones.

397 A comprehensive statistical analysis of 44 placental extracts associated MDMX,  
398 PICALM, OT-R and V1aR protein levels with labor at term and a number of clinical  
399 parameters and gestational complications. Further studies may assign their binary protein

400 interactions into networks of signaling partnerships among patient groups with normal  
401 gestation and gestational complications.<sup>43</sup> The predominant expression of MDMX on fetal  
402 macrophages (HC)<sup>37</sup> and the association of MDMX levels in the villi with most of the clinical  
403 characteristics we tested, suggest that MDMX has a central role in comorbidities, that  
404 originate from deficient trophoblast proliferation,<sup>44</sup> and are linked to pre-existing conditions  
405 and environmental exposures.<sup>45</sup>

406

407 **MDMX immunoprecipitations.** We were puzzled that the immunoprecipitated MDMX had  
408 a molecular mass of 50 kDa, instead of 75 kDa in the placental extracts (Fig. 1, B and E).  
409 A possible explanation was offered by the discovery<sup>46</sup> that MDMX interacts with TRPM7,  
410 a bi-functional cation channel protein fused with a kinase domain. TRPM7 is a master  
411 regulator of the cellular balance of divalent cations, that mediates the uptake of Zn<sup>2+</sup>, Mg<sup>2+</sup>  
412 and Ca<sup>2+</sup>,<sup>47</sup> and senses oxidative stress to release Zn<sup>2+</sup> from intracellular vesicles<sup>48</sup>.  
413 TRPM7 regulates MDMX levels by modulating Zn<sup>2+</sup> concentration, and induces the  
414 formation of faster moving forms of MDMX on SDS-PAGE gels<sup>46</sup>. These forms depend on  
415 the channel function of TRPM7 and proteasomal degradation. We hypothesize that  
416 placental TRPM7, which is downregulated in preeclampsia,<sup>49</sup> interacted with MDMX during  
417 the overnight incubation with the immunoprecipitation beads stripping MDMX of Zn<sup>2+</sup>.  
418 Proteasomal degradation was prevented by including MG-132 in our tissue-extraction and  
419 IP buffer. We missed detecting TRPM7 because it did not enter the top section of the 4-  
420 12% Bis-Tris NuPAGE gels we used to fractionate the IP proteins with and submit the 25-  
421 220 kDa strips for proteomic analysis (see Methods). TRPM7 has a theoretical mass of  
422 213 kDa and pI 8.1, but on SDS-PAGE gels it is shown at 230 kDa and was reported at  
423 245 kDa in BN electrophoresis.

424

425 **Autoantibody antigens and TRIM21.** Although our patients did not show symptoms of  
426 autoimmune diseases, a few of the immunoprecipitated proteins listed on Table 20 were  
427 also among the autoantigens detected by Neiman *et al.* in healthy adults<sup>50</sup>, such as the  
428 extensively studied autoantigens TRIM21/Ro(SS-A) and PDC-E2, also an autoantigen in  
429 primary biliary cholangitis and other autoimmune diseases. PDC-E2 would be held on the  
430 beads as a partner of VEGFR2. TRIM21 is also extracted from intervillous maternal



431 leucocytes based on their staining with TRIM21 (Fig. 2B). Maternal autoantigen-  
432 autoantibody complexes, with an affinity for proteins in the villous membrane fraction,  
433 would be trapped on the beads by Fc-receptor TRIM21 based on its high affinity for IgG<sup>26</sup>.  
434 Since TRIM21 has broad species specificity, it could bind to the sheep anti-rabbit Ab on  
435 the Dynabeads and the IP-bait, the anti-rabbit Ab the beads were charged with. If TRIM21  
436 clusters on the beads remain catalytically active, they could, in principle, retain VEGFR2,  
437 MDMX and PICALM, as substrates of ubiquitin ligases, along with other proteins, many  
438 not *in vivo* TRIM21 substrates, detected by mass spectrometry. Consequently, TRIM21  
439 can confound immunoprecipitations, performed according to our protocol, by retaining  
440 proteins unrelated to the bait-Ab. Based on the extensive TRIM21 literature, placental  
441 TRIM21 could participate in metabolic pathways as an E3 ubiquitin ligase,<sup>51,52</sup> and as Fc  
442 receptor defending against infections.

443

444 **Immunohistochemistry and immunogold electron microscopy.** The distribution of  
445 VEGFR2, MDMX and PICALM in the villi was shown by IHC (Fig. 2) and by IGEM which  
446 also showed the distribution of OT-R and V1aR (Figures 3-7). VEGFR2 was detected in  
447 the nucleus, as previously reported<sup>27,53</sup>, and in mitochondria, a novel observation to the  
448 best of our knowledge (Fig. 3, panels A, B and C). Translocation in the other direction,  
449 mitochondria to the nucleus, was shown for the entire pyruvate dehydrogenase complex  
450 to supply acetyl-CoA for histone acetylation<sup>54</sup>. VEGFR2 is distributed through relay  
451 networks in lipid rafts and endosomal trafficking<sup>55</sup> and SUMOylation holds VEGFR2 at the  
452 traffic control Golgi apparatus<sup>56</sup>. Gradients in receptor concentration may exist along the  
453 placental vascular tree, as was shown for the purinergic P2Y<sub>2</sub> receptor (pI=9.7)<sup>57</sup>.  
454 Distortion of receptor gradients in preeclampsia and diabetes could affect protein traffic  
455 and even expose proteins to degradation. Regarding the latter, it may be pertinent to  
456 consider the mechanism of action of estrogen receptor antagonists that decreased the  
457 estrogen receptor intra-nuclear mobility and subsequently induced its turnover<sup>58</sup>.

458 MDMX appeared in nuclear clusters (Fig. 4, A and B). PICALM was detected in  
459 nuclei (Fig. 5, B and C). The very basic OT-R and V1aR were also detected (Figures 6  
460 and 7). Surprisingly, clusters of V1aR became clearly visible on a fetal RBC after  
461 increasing gamma (Fig. 7, C). Since vasopressin receptors participate in erythropoiesis<sup>59</sup>

462 their presence on RBC was not very surprising. We hypothesize that in addition to non-  
463 traditional functions, such as critical immune sensors,<sup>60</sup> RBC transport V1aR to the  
464 endothelial cells of the villi<sup>25</sup>.

465 PICALM and OT-R were detected on endothelial cell projections into the fetal lumen  
466 (Figures 5A, 6A) where OT-R clusters were also observed (Fig. 6, A and B) matching the  
467 dimensions of microvesicles-exosomes<sup>10,11</sup>. Although we cannot prove that OT-R clusters  
468 are inside exosomes with the characteristic bi-lipid membranes, as seen in standard EM  
469 cellular morphology, we propose that fetal exosomes carry to the fetus the OT-R and other  
470 proteins produced in the placenta. A limitation of IGEM, from the exosome perspective, is  
471 that bi-lipid layers are greatly impaired during the processing of tissues because OsO<sub>4</sub> is  
472 omitted in a post-fixation step used to increase the visualization of such membranes. OsO<sub>4</sub>  
473 reacts strongly with lipid complexes, and while it enhances contrast for standard EM cell  
474 morphological imaging, it can oxidize many antigen epitopes in IGEM. Fig. 8 shows  
475 representative intraluminal vesicles<sup>9</sup> seen in the fetal capillary of the placenta sample that  
476 was processed with the OsO<sub>4</sub> post-fixational step included. Membranes are more clearly  
477 defined here, compared to the IGEM sample, representing exosomes or microvesicles<sup>9</sup> in  
478 the fetal lumen (Fig. 8, A and B). We noticed similarities between our IGEM Figures 5 and  
479 6 and transmission electron microscopy images in a study at two polluted cities in Mexico  
480 showing that environmental nanoparticles of Fe, Ti, Cu, Hg and Sn accumulated in HC  
481 and endothelial cells of chorionic villi sampled at term<sup>61</sup>.

482  
483 **Statistical analysis of protein levels and clinical presentations.** Our search for the  
484 function of the newly detected placental membrane proteins MDMX, PICALM, and of OT-  
485 R and V1aR, was accelerated by a statistical analysis of their protein levels, which  
486 revealed numerous associations with clinical characteristics of the 44 patients. MDMX,  
487 located predominantly in HC (Fig. 2C), took center stage based on its association with  
488 most of the clinical characteristics we tested. Although many of our statistical associations  
489 from 44 placentas are highly unlikely to be observed by chance, our conclusions could  
490 change by testing a larger number of placenta samples and integrating, after further  
491 research, protein isoforms and post-translational modifications of the newly detected  
492 proteins. But to what extent did proteins from intervillous blood, reflecting also the maternal

493 immune system,<sup>45</sup> contribute to the observed clinical associations? An initial answer was  
494 provided for MDMX by the statistical analyses showing that tissue-resident HC contributed  
495 most extensively since they predominantly express MDMX (Fig. 2).

496

497 **Diabetes.** In diabetic patients, higher MDMX levels (Table 6) seem to correspond to the  
498 higher number of cells stained with CD163<sup>62</sup>, a marker of HC<sup>39</sup>. It is not known if MDMX  
499 upregulation and higher HC numbers mark a metabolic shift towards diabetes. A diabetic  
500 atherosclerosis rat model showed upregulation of MDMX mRNA and protein levels<sup>63</sup>.  
501 MDMX was shown in cell cultures to serve as a nutrient sensor by inhibiting mTORC1<sup>64</sup>.  
502 HC could facilitate nutrient transportation in the villous stroma<sup>34</sup> linking placental MDMX to  
503 nutrient levels and metabolic networks. OT-R levels are higher in Type 2 diabetes (Table  
504 8), and there is an association of *OXTR* variants with insulin sensitivity and Type 2  
505 diabetes<sup>65</sup>.

506

507 **Preeclampsia.** Villous trophoblasts in pregnancies complicated by preeclampsia had  
508 higher p53 and lower MDM2 levels<sup>18</sup>. Although MDMX was not measured, we believe it  
509 would have been decreased also. Lower MDMX levels (Tables 6, 10) could reflect the  
510 decreased numbers of HC in preeclampsia<sup>40,41</sup>. What can cause the decrease of HC? In  
511 cancer, abnormal vascularity disrupts the penetration of immune cells,<sup>66</sup> and their function  
512 is hindered by the tumor microenvironment<sup>67,68</sup>. Here, defective placental vascularity and  
513 increased placental stiffness<sup>69</sup>, both changing the architecture of the villi, could have an  
514 adverse effect on HC levels. In preeclampsia, placental stiffness could be increased by  
515 higher levels of tissue transglutaminase/*TGM2* (Tables 3, 4) which catalyzes protein  
516 crosslinking<sup>32</sup>. MDMX could be involved in the reprogramming of fetal macrophages (HC)  
517 during preeclampsia and other gestational complications and labor. Drawing from the  
518 breast cancer literature<sup>70</sup>, downregulation of placental MDMX in preeclampsia could be  
519 linked to estrogen receptor- $\alpha$ <sup>71</sup> and lower estrogen levels<sup>72,73</sup>.

520 In preeclampsia large quantities of magnesium sulfate are prescribed to prevent  
521 seizures. A potentially relevant study of a blood-brain barrier (BBB) model of primary  
522 endothelial cells from human brain<sup>74</sup>, showed that TRPM7 mediated the entry of  
523 extracellular Mg<sup>2+</sup> into cells and that high Mg<sup>2+</sup> levels speeded up the clearance of A $\beta$  to

524 the blood side via BBB transcytosis and upregulation of PICALM and LRP-1 that is also  
525 expressed in HC<sup>75</sup>. It was shown recently that TRPM7 kinase activity induces amyloid- $\beta$   
526 degradation and clearance<sup>76</sup>. Among other mechanisms, the accumulation of placental  
527 A $\beta$ <sup>21</sup> could be related to TRPM7 and limiting PICALM-dependent transcytosis.

528  
529 **Gravidity.** Univariable and multivariable regression analysis found a significant  
530 association of gravidity with MDMX levels (Tables 6, 10). Gravidity was recently associated  
531 with HC levels determined by CD163 immunostaining<sup>41</sup>. While multigravida women have  
532 shorter telomeres and increased DNA methylation age,<sup>77</sup> a role of p53 and MDMX on  
533 telomere length is not established in normal human tissues, to the best of our knowledge.  
534 DNA methylation age is associated with MDMX and prenatal smoke exposure<sup>78</sup>. The  
535 gravidity-MDMX association, which registers in the villi, could reflect the cost of multiple  
536 pregnancies to the mother<sup>79</sup>.

537  
538 **PICALM, OT-R and V1aR.** The association of placental PICALM levels with BMI (Table  
539 7) is intriguing because the placenta functions in the absence of adipocytes. A potential  
540 precedent for such association was provided by a study on gastric bypass surgery where  
541 PICALM mRNA levels in the blood were decreased after a significant drop of BMI<sup>80</sup>.  
542 Furthermore, among the Alzheimer's risk nucleotide polymorphisms (SNP), a PICALM  
543 SNP is associated with obesity<sup>81</sup>.

544 The strong correlation of protein levels of PICALM with OT-R ( $p < 2.7 \times 10^{-8}$ ), PICALM  
545 with V1aR ( $p < 0.006$ ), and OT-R with V1aR ( $p < 0.001$ ) point to fundamental interactions by  
546 yet unknown mechanisms. MDMX was not correlated with PICALM, OT-R or V1aR.

547 Downregulation of OT-R in spontaneous vaginal deliveries (SVD) relative to CD  
548 prior to the onset of labor (Table 8), would be consistent with the higher oxytocin levels in  
549 SVD than CD. It is not known to what extent extravillous blood cells and exosomes may  
550 have supplied OT-R, and V1aR, detected in placental membrane extracts. Nevertheless,  
551 IGEM images of the chorionic villi support the hypothesis that the lipid-covered exosomes  
552 carry a cargo of the very basic, magnesium-dependent OT-R across the blood-brain  
553 barrier to interact also with fetal microglia<sup>82-84</sup>, the resident immune cells of the brain<sup>85</sup>. OT-  
554 R protein levels in venous and arterial blood from the umbilical cord may reveal differences

555 in bi-directional OT-R traffic in normal, preterm and postterm deliveries. In that case, OT-  
556 R protein levels and epigenetic modifications<sup>86</sup> may lead to therapeutic interventions with  
557 exosomes<sup>87</sup> prepared, ideally, with the transmembrane orientation<sup>12</sup> of OT-R in villous  
558 exosomes.

559

560 **Labor.** The decrease of MDMX in the membrane fraction of chorionic villi in SVD vs. CD  
561 prior to the onset of labor (Table 6), could be related to the decrease of immune cells in  
562 peripheral maternal blood with approaching labor<sup>88</sup>, and the molecular signature of the  
563 “immune clock”.<sup>45,89</sup> Lower MDMX levels could also indicate a molecular switch in late  
564 gestation, locally, to energy-preserving measures or other mechanisms involving uterine  
565 macrophages<sup>90</sup>. MDMX, PICALM, OT-R and V1aR could be components of the fetal and  
566 maternal immune system during pregnancy and as the fetus develops immunity in  
567 preparation for birth.<sup>91,92</sup> Concomitant downregulation of MDMX, PICALM, OT-R and  
568 V1aR occurred only in SVD compared to CD prior to the onset of labor (Tables 6-9)  
569 signifying a potential convergence of metabolic networks to prepare the uterus for the final  
570 act in pregnancy, delivery of the fetus.

571

## 572 **Materials and methods**

573

574 **Human Subjects.** All patients signed consent forms prior to their inclusion in the study  
575 according to the protocol approved by the Institutional Review Board of the University of  
576 South Florida and Tampa General Hospital. Placental samples were obtained from 44  
577 patients with singleton pregnancies, aged 19-40 and gestational ages ranging from 35-42  
578 weeks based on the dating criteria from the American College of Obstetricians and  
579 Gynecologists (ACOG) (<https://pubmed.ncbi.nlm.nih.gov/28426621/>) for women who  
580 delivered vaginally or by cesarean delivery (CD), between 7 AM to 4 PM, based on  
581 obstetric indications (Table 1). Patients were excluded if they had active viral infections or  
582 fetal growth restriction, defined as estimated fetal weight of <10<sup>th</sup>% per the Hadlock growth  
583 curve. Preeclampsia was diagnosed according to the criteria established in 2013 by ACOG  
584 (DOI: [10.1097/01.AOG.0000437382.03963.88](https://doi.org/10.1097/01.AOG.0000437382.03963.88)). Low risk pregnancy was defined by the  
585 absence of maternal co-morbidities including chronic hypertension defined as

586 hypertension prior to pregnancy or systolic blood pressure  $\geq 140$  mm Hg or diastolic blood  
587 pressure  $\geq 90$  mm Hg prior to 20 weeks' gestation, pregestational or gestational diabetes,  
588 smoking, renal disease, and autoimmune disease. Patients with preeclampsia with severe  
589 features defined by the 2013 ACOG Guidelines received magnesium sulfate for seizure  
590 prophylaxis during induction of labor or CD through 24h postpartum. The demographic  
591 Table 21 shows that 91% of study participants were 18-34 years old and 75% were  
592 multiparous. Most participants (91%) were  $\geq 37$  weeks' gestation. There was no risk of  
593 bias in the selection of placentas which was at random. Sample/patient IDs (e.g., H-1,  
594 J-1, etc.) are not known to anyone outside the research group, and are assigned  
595 identifiers not using any personally identifiable information.

596  
597 **Reagents.** Most of the reagents were purchased from Thermo Fisher Scientific  
598 (Waltham, MA, USA), MMP-200 metalloprotease inhibitor III, proteasome inhibitor  
599 MG-132, protease inhibitor cocktail III, marimastat, Hammarsten-grade casein, detergent  
600 ASB-14, Novagen S-protein HRP conjugate 69047-3, Novex 4-12% BT SDS-PAGE  
601 gels, CL-XPosure film, magnetic Dynabeads M-280 charged with sheep anti-rabbit  
602 antibodies, Maxisorp Nunc C-bottom 8-well strips, protein assay Pierce BCA 562 nm kit  
603 23225 (Pierce, Rockford, IL), and Protein Perfect HRP MW markers 69079-3/  
604 Millipore-Calbiochem (Billerica, MA). Additional reagents are provided in the sections  
605 below.

606  
607 **Antibodies (Protein target/vendor).** VEGFR2 (55B11) no. 2479/Cell Signaling  
608 (Danvers, MA), MDMX A300-287A/Bethyl Laboratories (Montgomery, TX),  
609 PDC-E2 SC-365276/Santa Cruz Biotechnology (Santa Cruz, CA), PICALM  
610 Sigma Prestige HPA019053, OT-R ABN1735/Millipore (Temecula, CA), V1aR  
611 MBS176788/MyBiosource (San Diego, CA), CD163 MA5-33091/InVitrogen-Thermo  
612 Fisher Scientific, TRIM21 Novus NBP1-33548 (Centennial, CO), Alexa-488 (green)  
613 and Alexa-64 (red) goat anti-rabbit/mouse conjugated secondary antibodies/Life  
614 Technologies (Eugene, OR), immunogold donkey-anti-rabbit secondary antibodies  
615 25702 (6 nm) and 25705 (10 nm) (Electron Microscopy Sciences (Hatfield, PA).

616  
**Placenta tissue collection, homogenization, and protein extraction with ASB-14**

Within 15 min of the delivery of the placenta,<sup>30</sup> samples were obtained from the fetal side of  
the placental bed at 4-5 cm from the umbilical cord and were placed on dry ice and then

617 stored at -80°C. Tissues were also fixed in formalin for IHC or in paraformaldehyde-tannic  
618 acid for IGEM. Frozen tissue samples were finely cut and placed, at 150 mg per mL, in  
619 homogenization buffer containing 50 mM sodium phosphate pH 7.6, 50 mM NaCl, 50 µM  
620 sodium o-vanadate, 10 mM NaF, 20 µM proteasome inhibitor MG-132, 10 µM marimastat  
621 and 6 µL protease inhibitor cocktail-III per mL. After homogenization at 4°C by three 15s  
622 bursts of a homogenizer with one-minute cooling in between, the homogenates were  
623 centrifuged for 1h at 100,000g. On top of the pellets was a thin pink fluffy layer, presumably  
624 of RBC membranes, which was included when the pellets were suspended in  
625 homogenization buffer containing 1% ASB-14 and then extracted overnight, due to  
626 logistical reasons, at 6-8°C by end-over-end rotation. The zwitterionic detergent ASB-14  
627 was superior in solubilizing membrane proteins to CHAPSO or n-octyl β-D-maltoside. After  
628 centrifugation at 100,000g for 1h, the supernatant solution was used in  
629 immunoprecipitations and western blots. We refrained from washing the membrane pellets  
630 in order to capture weak protein complexes. Protein levels of the membrane extracts were  
631 determined in quadruplicate at two dilutions with the Pierce BCA 562 nm kit. Final yield:  
632 10-15 mg of detergent-extracted proteins per g wet tissue. To determine the efficiency of  
633 protein extraction by ASB-14, the post-ASB-14 100,000g pellets were solubilized in SDS-  
634 DTT at 95°C and then probed in western blots. Extraction yield was 100% for VEGFR2,  
635 MDMX and PICALM, 86% for PDC-E2 and 64% for TOMM20, a marker for inner  
636 mitochondrial membranes.

637  
638 **Peptide synthesis to validate the OT-R and V1aR antibodies.** Fig. 10 shows OT-R  
639 peptides EGNRTAGPPRRNEA (within the OT-R immunogen range given for this  
640 antibody), AEAPEGAAAGDGGRVA (outside the OT-R immunogen range) and V1aR  
641 immunogen peptide HPLKTLQQPARRSRLMIAA to validate the OT-R Millipore ABN1735  
642 (0.5 µg/µL) and V1aR MyBioSource MBS176788 (0.5 µg/µL) antibodies. The peptides  
643 were synthesized on 100 mg Rink Amide-MBHA resin (0.65 mmol/g) at room temperature  
644 under air using standard solid phase peptide synthesis protocol.

645

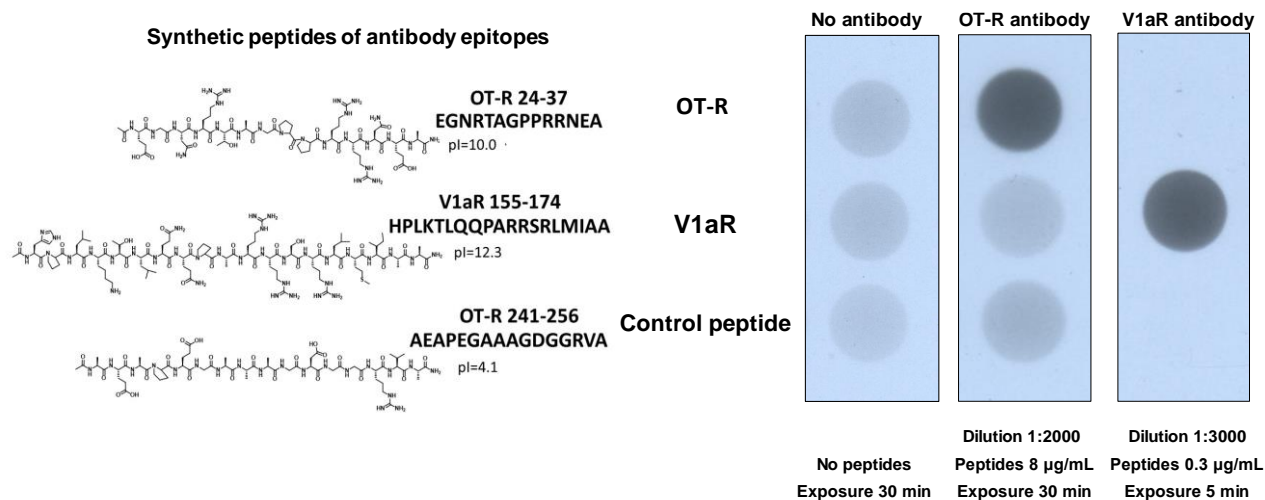

646

647 **Fig. 10. Validation of OT-R and V1aR antibodies.** The synthesized peptides and their pI  
 648 are shown next to the scans of the coated Nunc C-bottom strips probed with the antibodies  
 649 being validated.

650 **Validation method for OT-R and V1aR antibodies.** Maxisorp Nunc C-bottom strips were  
 651 coated overnight at 4°C with the indicated amounts of synthetic peptides (Fig. 10)  
 652 dissolved in sodium carbonate buffer pH 9.6<sup>93</sup>. After blocking, as in western blot  
 653 experiments, the OT-R and V1aR antibodies were added for 2h at room temperature at  
 654 the indicated dilution followed by the secondary anti-rabbit antibody conjugated with  
 655 horseradish peroxidase. Detection of bound OT-R or V1aR antibodies was conducted by  
 656 ECL on films exposed for the indicated times. The OT-R and V1aR antibodies bound only  
 657 to peptide sequences used to raise them.

658

659 **Immunoprecipitations.** Each immunoprecipitation of the 4-6 placental extracts, shown in  
 660 Table 3-5, was carried out in one batch. Half mL of pellicular support M-280 Dynabeads  
 661 was washed in homogenization buffer containing 1% ASB-14 and charged separately at  
 662 room temperature for 2h with 0.9 µg VEGFR2, 15 µg MDMX or 7.5 µg PICALM antibody.  
 663 Three mg of ASB14-extracted placental membranes from each placenta were mixed  
 664 separately with the beads, overnight for logistical reasons, at 6-8°C. Most proteins  
 665 adhering to the beads were removed by washing four times with homogenization buffer



666 containing 1% ASB-14 and once with detergent-free buffer. Bound proteins were eluted at  
667 95°C with 100 mM Tris-HCl pH 7.6, 4% SDS (w/v) and 100 mM DTT. Eluted proteins were  
668 fractionated on 4-12% Bis-Tris NuPAGE gels. After Coomassie blue staining, gel strips  
669 from 25-220 kDa were submitted for mass spectrometric analysis.

670

671 **Mass spectrometry.** Samples were submitted and analyzed in a double-blinded fashion.  
672 Immunoprecipitated proteins were digested with Trypsin/Lys-C overnight at 37°C as  
673 described<sup>94</sup>. Each group of immunoprecipitated samples was analyzed with a new trap  
674 and HPLC column. Peptides were dried in a vacuum concentrator and resuspended in  
675 0.1% formic acid for LC-MS/MS analysis. Peptides were separated with a C18 reversed-  
676 phase-HPLC column on an Ultimate3000 UHPLC with a 60-min gradient and analyzed on  
677 a Q-Exactive Plus using data-dependent acquisition. Raw data files were processed in  
678 MaxQuant ([www.maxquant.org](http://www.maxquant.org)) and searched against the UniprotKB human protein  
679 sequence database. Search parameters included constant modification of cysteine by  
680 carbamidomethylation and the variable modification, methionine oxidation. Proteins were  
681 identified using the filtering criteria of 1% protein and peptide false discovery rate.

682

683 **Western blot analysis.** 25 µg of protein from placental extracts were resolved on 4-12%  
684 Bis-Tris NuPAGE gels, transferred to PVDF membranes and blocked overnight at room  
685 temperature in 1% Hammarsten-grade casein or 5% Difco skimmed milk powder. MDMX,  
686 PICALM, OT-R or V1aR primary antibody dilutions ranged from 1:800 to 1:10000. PVDF  
687 membranes incubated with ECL reagents were exposed to film for 1-20s. Films were  
688 scanned in the transmittance mode (Epson Perfection 3200 Photo, Epson America, Los  
689 Alamitos, CA, USA). The intensity of the top band (Fig. 9) was measured with Li-Cor Image  
690 Studio Lite software (Lincoln, Nebraska, USA) and chosen from a film exposed at the linear  
691 portion of the correlation between band intensity and film exposure time before films were  
692 overexposed. In the statistical analyses we used the mean intensity from 3.6 blots, on the  
693 average, and relative to an internal control sample Q1 or V1 (Table 5).

694

695 **Immunohistochemistry.** 4 µm formalin-fixed paraffin embedded tissue sections were  
696 processed for IHC and stained with VEGFR2 (1:50), MDMX (1:500) or PICALM (1:1000)

697 antibodies. Slides were exposed with diaminobenzidine tetrahydrochloride dehydrate as a  
698 chromogen and counterstained with hematoxylin before permanent mounting.

699  
700 **Immunogold electron microscopy.** Tissue samples were promptly fixed in buffered 4%  
701 paraformaldehyde and kept overnight at 4°C and then immersed in 0.75% buffered  
702 solution of tannic acid for 2h at room temperature. Samples were rinsed in filtered glass-  
703 distilled water, dehydrated through a series of increasing ethanol concentration, infiltrated,  
704 and embedded in LRW acrylic resin. Selected blocks were sectioned at 90-100 nm and  
705 mounted on formvar coated copper grids. The immunogold reaction was performed by  
706 incubating grids in standard blocking solution for 30 min at room temperature and  
707 transferring to either 1:100 MDMX rabbit Ab, 1:400 PICALM rabbit Ab, 1:100 VEGFR2  
708 rabbit Ab or 1:600 OT-R or V1aR rabbit Ab for an overnight incubation at 4°C. After  
709 washing in PBS, gold-conjugated donkey anti-rabbit Ab 25703 (Electron Microscopy  
710 Sciences, Hatfield, PA), was applied at 1:50 dilution for 90 min at room temperature. The  
711 diameter of the gold particles (Electron Microscopy Sciences, Hatfield, PA) was 6 nm in  
712 VEGFR2 and MDMX and 10 nm in PICALM and OT-R experiments. Excess secondary  
713 antibody was removed by washing with glass-distilled water and the grids were further  
714 treated with 2% aqueous uranyl acetate added for contrast. In control experiments  
715 excluding the primary antibody, 1-2 gold particles were detected throughout the grids. In  
716 morphological analysis by transmission electron microscopy, tissues were fixed in 2%  
717 OsO<sub>4</sub>, after 2.5% glutaraldehyde fixation and prior to the dehydration and resin infiltration  
718 steps. Images were obtained with a JEM-1400 transmission electron microscope (JEOL,  
719 Peabody, MA) and Orius-832 camera (Gatan Inc., Pleasanton, CA).

720  
721 **Whole mount immunofluorescence (WMIF).** Small samples (2x2x2 mm) of placental  
722 tissues ,were fixed in 1 mL 90% methanol for 2h at 4°C according to Bushway et al.<sup>95</sup> with  
723 modifications. After washing with PBS, the samples were blocked for 2h at 4°C with 1%  
724 Hammarsten-grade casein in PBS containing 0.02% Thimerosal. After washing with 0.5%  
725 Casein in PBS, antibodies to VEGFR2 and PDC-E2 were added at 1:400 dilution and  
726 incubated overnight at 4°C, followed by washing with 0.5% Casein-PBS containing 0.3%  
727 Triton-X and incubation with the secondary antibodies at 1:100 dilutions. WMIF slides were

728 observed with a Leica TCS SP5 AOBS laser scanning confocal microscope through a  
729 40X/1.3NA Plan Achromat oil immersion objective lens (Leica Microsystems CMS  
730 GmbH, Germany). 405 Diode, Argon 488 and He-Ne 647 laser lines were applied to excite  
731 the samples and tunable emissions were used to minimize crosstalk between  
732 fluorochromes. Images were captured with photomultiplier detectors and prepared with the  
733 LAS AF software version 2.7 (Leica Microsystems CMS GmbH, Germany). A 3D projected  
734 image was created by Z-stack of images taken at 1.0-0.5-micron intervals to create a  
735 movie by Imaris version 7.6 (Bitplane AG, Switzerland) ( video).

736

737 **Statistical analysis.** The protein levels of MDMX, PICALM, OT-R and V1aR were  
738 analyzed for univariable and multivariable associations by linear regression using the R  
739 statistical program (<https://www.r-project.org>, 4.1.3). Parsimonious multivariable models  
740 were selected using Akaike's Information Criteria with a stepwise selection procedure  
741 (StepAIC in the MASS package of R) and were run with covariates that were identified as  
742 statistically significant in univariable analysis. A p-value of less than 0.05 was considered  
743 statistically significant. Violin plots were made by R statistical program, and data Figures  
744 and graphs were assembled using Fiji ImageJ, GraphPad Prism 9.4.0, Adobe Illustrator  
745 and Windows Office365 software. To test the robustness of results to the specific  
746 datapoints included in the analysis, bootstrapped resampling (with replacement) was used  
747 to generate 1000 replicate datasets, upon which regression analyses were redone.  
748 Results of bootstrapped resampled analyses were summarized and compared to the full  
749 dataset to characterize consistency of point estimates and patterns of statistical  
750 significance. Pearson correlation coefficients were used to characterize correlation of  
751 protein measurements with each other.

752

### 753 **Acknowledgements**

754 This study was supported by the Department of Obstetrics and Gynecology at the  
755 University of South Florida and research funds from Tampa General Hospital (AEA) and  
756 the Teasley Foundation (TJR). The WMIF images were obtained by the Analytic  
757 Microscopy Core Facility at the H. Lee Moffitt Cancer Center & Research Institute, an NCI  
758 designated Comprehensive Cancer Center (P30-CA076292). We thank Umit A. Kayisli for

759 advice on IHC, and Santo V. Nicosia and Greg Arsenis for reading the manuscript and  
760 comments.

761

## 762 **Author contributions**

763 JCMT conceived the study, performed most wet chemistry experiments, and wrote the first  
764 draft of the manuscript in consultation with VNU and RRM. SJH, RGS, and EPN recruited  
765 patients, collected, and interpreted clinical data in consultation with TSS, TJR, AEA, and  
766 MLA. DC performed proteomic analyses. MO assisted in the analysis of western blot data  
767 and confocal and WMIF experiments. SA and NS performed IHC experiments. AG  
768 performed and interpreted IGEM. PS and JC synthesized OT-R and V1aR peptides. DATC  
769 performed analyses and statistical data presentation. All authors critically read and  
770 approved the manuscript.

771

## 772 **Competing interests**

773 DATC declares a grant from Merck for research unrelated to this manuscript. The  
774 remaining authors declare no competing interests.

775

## 776 **Data availability**

777 The video of the chorionic villi is deposited at

778 [https://nam04.safelinks.protection.outlook.com/?url=https%3A%2F%2Fzenodo.org%2Frecord%2F8160169%3Ftoken%3DeyJkYXRhbjp7InJlY2lkjo4MTYwMTY5fSwiaWQiOjM1ODEzLCJybMqiOiJjMTIkOTM2NCJ9.2OSYKMRxBpqO7afBKem\\_S8HdQJgmbtnahLFTgJ\\_5hoiK3wxcB2fvuyqEPJ0PeTtF\\_r9f9Zuocr6LcfXPs2-gw&data=05%7C01%7Ctsibris%40usf.edu%7C02564875fb61480dab4f08db87ae6fdb%7C741bf7dee2e546df8d6782607df9deaa%7C0%7C0%7C638252955485880125%7CUnknown%7CTWFpbGZsb3d8eyJWljoic4wLjAwMDAiLCJQIjoiV2luMzliLCJBTiI6Ikk1haWwiLCJXVCi6Mn0%3D%7C3000%7C%7C%7C&sdata=iukZjIFovoliQAdfd566alnMH33jLMz3TV%2BDqPv5Trk%3D&reserved=0](https://nam04.safelinks.protection.outlook.com/?url=https%3A%2F%2Fzenodo.org%2Frecord%2F8160169%3Ftoken%3DeyJkYXRhbjp7InJlY2lkjo4MTYwMTY5fSwiaWQiOjM1ODEzLCJybMqiOiJjMTIkOTM2NCJ9.2OSYKMRxBpqO7afBKem_S8HdQJgmbtnahLFTgJ_5hoiK3wxcB2fvuyqEPJ0PeTtF_r9f9Zuocr6LcfXPs2-gw&data=05%7C01%7Ctsibris%40usf.edu%7C02564875fb61480dab4f08db87ae6fdb%7C741bf7dee2e546df8d6782607df9deaa%7C0%7C0%7C638252955485880125%7CUnknown%7CTWFpbGZsb3d8eyJWljoic4wLjAwMDAiLCJQIjoiV2luMzliLCJBTiI6Ikk1haWwiLCJXVCi6Mn0%3D%7C3000%7C%7C%7C&sdata=iukZjIFovoliQAdfd566alnMH33jLMz3TV%2BDqPv5Trk%3D&reserved=0).

788 All MS raw files and corresponding results files will be deposited to the ProteomeXchange  
789 Consortium via the PRIDE partner repository.

790

791  
792  
793  
794  
795  
796  
797  
798  
799  
800  
801  
802  
803  
804  
805  
806  
807  
808  
809  
810  
811  
812  
813  
814  
815  
816  
817  
818  
819  
820  
821  
822  
823  
824  
825  
826  
827  
828  
829  
830  
831  
832  
833  
834  
835  
836

## REFERENCES

- 1 Burton, G. J. & Fowden, A. L. The placenta: a multifaceted, transient organ. *Philos Trans R Soc Lond B Biol Sci* **370**, 20140066 (2015). <https://doi.org/10.1098/rstb.2014.0066>
- 2 Burton, G. J., Redman, C. W., Roberts, J. M. & Moffett, A. Pre-eclampsia: pathophysiology and clinical implications. *BMJ* **366**, l2381 (2019). <https://doi.org/10.1136/bmj.l2381>
- 3 Aplin, J. D., Myers, J. E., Timms, K. & Westwood, M. Tracking placental development in health and disease. *Nat Rev Endocrinol* **16**, 479-494 (2020). <https://doi.org/10.1038/s41574-020-0372-6>
- 4 Shibuya, M. VEGFR and type-V RTK activation and signaling. *Cold Spring Harbor perspectives in biology* **5**, a009092 (2013). <https://doi.org/10.1101/cshperspect.a009092>
- 5 Peach, C. J. *et al.* Molecular Pharmacology of VEGF-A Isoforms: Binding and Signalling at VEGFR2. *Int J Mol Sci* **19** (2018). <https://doi.org/10.3390/ijms19041264>
- 6 Simons, M., Gordon, E. & Claesson-Welsh, L. Mechanisms and regulation of endothelial VEGF receptor signalling. *Nature reviews. Molecular cell biology* **17**, 611-625 (2016). <https://doi.org/10.1038/nrm.2016.87>
- 7 Qu, H. & Khalil, R. A. Vascular mechanisms and molecular targets in hypertensive pregnancy and preeclampsia. *Am J Physiol Heart Circ Physiol* **319**, H661-H681 (2020). <https://doi.org/10.1152/ajpheart.00202.2020>
- 8 Roberts, J. M. *et al.* Subtypes of Preeclampsia: Recognition and Determining Clinical Usefulness. *Hypertension* **77**, 1430-1441 (2021). <https://doi.org/10.1161/HYPERTENSIONAHA.120.14781>
- 9 Mincheva-Nilsson, L. Immunosuppressive Protein Signatures Carried by Syncytiotrophoblast-Derived Exosomes and Their Role in Human Pregnancy. *Front Immunol* **12**, 717884 (2021). <https://doi.org/10.3389/fimmu.2021.717884>
- 10 Ormazabal, V., Nair, S., Carrion, F., McIntyre, H. D. & Salomon, C. The link between gestational diabetes and cardiovascular diseases: potential role of extracellular vesicles. *Cardiovasc Diabetol* **21**, 174 (2022). <https://doi.org/10.1186/s12933-022-01597-3>
- 11 Morelli, A. E. & Sadovsky, Y. Extracellular vesicles and immune response during pregnancy: A balancing act. *Immunol Rev* (2022). <https://doi.org/10.1111/imr.13074>
- 12 Kugeratski, F. G., Santi, A. & Zanivan, S. Extracellular vesicles as central regulators of blood vessel function in cancer. *Science signaling* **15**, eaaz4742 (2022). <https://doi.org/10.1126/scisignal.aaz4742>
- 13 Uhlen, M. *et al.* Proteomics. Tissue-based map of the human proteome. *Science* **347**, 1260419 (2015). <https://doi.org/10.1126/science.1260419>
- 14 Wang, D. *et al.* A deep proteome and transcriptome abundance atlas of 29 healthy human tissues. *Mol Syst Biol* **15**, e8503 (2019). <https://doi.org/10.15252/msb.20188503>
- 15 Di Meo, A. *et al.* Proteomic Profiling of the Human Tissue and Biological Fluid Proteome. *J Proteome Res* **20**, 444-452 (2021). <https://doi.org/10.1021/acs.jproteome.0c00502>
- 16 Manna, S. *et al.* A proteomic profile of the healthy human placenta. *Clin Proteomics* **20**, 1 (2023). <https://doi.org/10.1186/s12014-022-09388-4>
- 17 Klein, A. M., de Queiroz, R. M., Venkatesh, D. & Prives, C. The roles and regulation of MDM2 and MDMX: it is not just about p53. *Genes Dev* (2021). <https://doi.org/10.1101/gad.347872.120>
- 18 Sharp, A. N. *et al.* Preeclampsia is associated with alterations in the p53-pathway in villous trophoblast. *PLoS One* **9**, e87621 (2014). <https://doi.org/10.1371/journal.pone.0087621>
- 19 Tebar, F., Bohlander, S. K. & Sorkin, A. Clathrin assembly lymphoid myeloid leukemia (CALM) protein: localization in endocytic-coated pits, interactions with clathrin, and the impact of

- 837 overexpression on clathrin-mediated traffic. *Mol Biol Cell* **10**, 2687-2702 (1999).  
838 <https://doi.org/10.1091/mbc.10.8.2687>
- 839 20 Ando, K. *et al.* PICALM and Alzheimer's Disease: An Update and Perspectives. *Cells* **11** (2022).  
840 <https://doi.org/10.3390/cells11243994>
- 841 21 Buhimschi, I. A. *et al.* Protein misfolding, congophilia, oligomerization, and defective amyloid  
842 processing in preeclampsia. *Science translational medicine* **6**, 245ra292 (2014).  
843 <https://doi.org/10.1126/scitranslmed.3008808>
- 844 22 Meyerowitz, J. G. *et al.* The oxytocin signaling complex reveals a molecular switch for cation  
845 dependence. *Nat Struct Mol Biol* (2022). <https://doi.org/10.1038/s41594-022-00728-4>
- 846 23 Jurek, B. & Neumann, I. D. The Oxytocin Receptor: From Intracellular Signaling to Behavior. *Physiol*  
847 *Rev* **98**, 1805-1908 (2018). <https://doi.org/10.1152/physrev.00031.2017>
- 848 24 Dekan, Z. *et al.* Nature-inspired dimerization as a strategy to modulate neuropeptide  
849 pharmacology exemplified with vasopressin and oxytocin. *Chem Sci* **12**, 4057-4062 (2021).  
850 <https://doi.org/10.1039/d0sc05501h>
- 851 25 Liu, X., Luo, D., Zhang, J. & Du, L. Distribution and relative expression of vasoactive receptors on  
852 arteries. *Sci Rep* **10**, 15383 (2020). <https://doi.org/10.1038/s41598-020-72352-5>
- 853 26 Zeng, J. *et al.* Target-induced clustering activates Trim-Away of pathogens and proteins. *Nat Struct*  
854 *Mol Biol* **28**, 278-289 (2021). <https://doi.org/10.1038/s41594-021-00560-2>
- 855 27 Domingues, I., Rino, J., Demmers, J. A., de Lanerolle, P. & Santos, S. C. VEGFR2 translocates to the  
856 nucleus to regulate its own transcription. *PLoS One* **6**, e25668 (2011).  
857 <https://doi.org/10.1371/journal.pone.0025668>
- 858 28 Collier, A. Y., Smith, L. A. & Karumanchi, S. A. Review of the immune mechanisms of preeclampsia  
859 and the potential of immune modulating therapy. *Hum Immunol* **82**, 362-370 (2021).  
860 <https://doi.org/10.1016/j.humimm.2021.01.004>
- 861 29 Streicher, K. *et al.* The plasma cell signature in autoimmune disease. *Arthritis & rheumatology*  
862 *(Hoboken, N.J.)* **66**, 173-184 (2014). <https://doi.org/10.1002/art.38194>
- 863 30 Gafencu, A., Heltianu, C., Burlacu, A., Hunziker, W. & Simionescu, M. Investigation of IgG receptors  
864 expressed on the surface of human placental endothelial cells. *Placenta* **24**, 664-676 (2003).  
865 [https://doi.org/10.1016/s0143-4004\(03\)00041-9](https://doi.org/10.1016/s0143-4004(03)00041-9)
- 866 31 Hu, L. *et al.* Identification of a novel heterogeneous nuclear ribonucleoprotein A2B1 (hnRNP A2B1)  
867 ligand that disrupts HnRNP A2B1/nucleic acid interactions to inhibit the MDMX-p53 axis in gastric  
868 cancer. *Pharmacol Res* **189**, 106696 (2023). <https://doi.org/10.1016/j.phrs.2023.106696>
- 869 32 Liu, C., Kellems, R. E. & Xia, Y. Inflammation, Autoimmunity, and Hypertension: The Essential Role  
870 of Tissue Transglutaminase. *Am J Hypertens* **30**, 756-764 (2017).  
871 <https://doi.org/10.1093/ajh/hpx027>
- 872 33 Reyes, L. & Golos, T. G. Hofbauer Cells: Their Role in Healthy and Complicated Pregnancy. *Front*  
873 *Immunol* **9**, 2628 (2018). <https://doi.org/10.3389/fimmu.2018.02628>
- 874 34 Zulu, M. Z., Martinez, F. O., Gordon, S. & Gray, C. M. The Elusive Role of Placental Macrophages:  
875 The Hofbauer Cell. *J Innate Immun* **11**, 447-456 (2019). <https://doi.org/10.1159/000497416>
- 876 35 Semmes, E. C. & Coyne, C. B. Innate immune defenses at the maternal-fetal interface. *Curr Opin*  
877 *Immunol* **74**, 60-67 (2021). <https://doi.org/10.1016/j.coi.2021.10.007>
- 878 36 Fakonti, G., Pantazi, P., Bokun, V. & Holder, B. Placental Macrophage (Hofbauer Cell) Responses to  
879 Infection During Pregnancy: A Systematic Scoping Review. *Front Immunol* **12**, 756035 (2021).  
880 <https://doi.org/10.3389/fimmu.2021.756035>
- 881 37 Ning, J., Zhang, M., Cui, D. & Yang, H. The pathologic changes of human placental macrophages in  
882 women with hyperglycemia in pregnancy. *Placenta* **130**, 60-66 (2022).  
883 <https://doi.org/10.1016/j.placenta.2022.11.004>

- 884 38 Girsch, J. H. *et al.* Host-Viral Interactions at the Maternal-Fetal Interface. What We Know and What  
885 We Need to Know. *Frontiers (Boulder)* **2** (2022). <https://doi.org/10.3389/fviro.2022.833106>
- 886 39 Lasch, M. *et al.* Isolation of Decidual Macrophages and Hofbauer Cells from Term Placenta-  
887 Comparison of the Expression of CD163 and CD80. *Int J Mol Sci* **23** (2022).  
888 <https://doi.org/10.3390/ijms23116113>
- 889 40 Mercnik, M. H., Schliefssteiner, C., Fluhr, H. & Wadsack, C. Placental macrophages present distinct  
890 polarization pattern and effector functions depending on clinical onset of preeclampsia. *Front*  
891 *Immunol* **13**, 1095879 (2022). <https://doi.org/10.3389/fimmu.2022.1095879>
- 892 41 Mittelberger, J. *et al.* The programmed cell death protein 1 (PD1) and the programmed cell death  
893 ligand 1 (PD-L1) are significantly downregulated on macrophages and Hofbauer cells in the  
894 placenta of preeclampsia patients. *Journal of reproductive immunology* **157**, 103949 (2023).  
895 <https://doi.org/10.1016/j.jri.2023.103949>
- 896 42 Zinn, V. Z., Khatri, A., Mednieks, M. I. & Hand, A. R. Localization of cystic fibrosis transmembrane  
897 conductance regulator signaling complexes in human salivary gland striated duct cells. *Eur J Oral*  
898 *Sci* **123**, 140-148 (2015). <https://doi.org/10.1111/eos.12184>
- 899 43 Maron, B. A. *et al.* Individualized interactomes for network-based precision medicine in  
900 hypertrophic cardiomyopathy with implications for other clinical pathophenotypes. *Nat Commun*  
901 **12**, 873 (2021). <https://doi.org/10.1038/s41467-021-21146-y>
- 902 44 Burton, G. J. & Jauniaux, E. The human placenta: new perspectives on its formation and function  
903 during early pregnancy. *Proc Biol Sci* **290**, 20230191 (2023).  
904 <https://doi.org/10.1098/rspb.2023.0191>
- 905 45 Ozen, M. *et al.* Omics approaches: interactions at the maternal-fetal interface and origins of child  
906 health and disease. *Pediatr Res*, 1-10 (2022). <https://doi.org/10.1038/s41390-022-02335-x>
- 907 46 Wang, H. *et al.* The ion channel TRPM7 regulates zinc depletion-induced MDMX degradation. *J Biol*  
908 *Chem*, 101292 (2021). <https://doi.org/10.1016/j.jbc.2021.101292>
- 909 47 Nadezhdin, K. D. *et al.* Structural mechanisms of TRPM7 activation and inhibition. *Nat Commun* **14**,  
910 2639 (2023). <https://doi.org/10.1038/s41467-023-38362-3>
- 911 48 Abiria, S. A. *et al.* TRPM7 senses oxidative stress to release Zn(2+) from unique intracellular vesicles.  
912 *Proc Natl Acad Sci U S A* **114**, E6079-E6088 (2017). <https://doi.org/10.1073/pnas.1707380114>
- 913 49 Yang, H., Kim, T. H., Lee, G. S., Hong, E. J. & Jeung, E. B. Comparing the expression patterns of  
914 placental magnesium/phosphorus-transporting channels between healthy and preeclamptic  
915 pregnancies. *Mol Reprod Dev* **81**, 851-860 (2014). <https://doi.org/10.1002/mrd.22353>
- 916 50 Neiman, M. *et al.* Individual and stable autoantibody repertoires in healthy individuals.  
917 *Autoimmunity* **52**, 1-11 (2019). <https://doi.org/10.1080/08916934.2019.1581774>
- 918 51 Cheng, J. *et al.* TRIM21 and PHLDA3 negatively regulate the crosstalk between the PI3K/AKT  
919 pathway and PPP metabolism. *Nat Commun* **11**, 1880 (2020). <https://doi.org/10.1038/s41467-020-15819-3>
- 920
- 921 52 Park, J. S. *et al.* Mechanical regulation of glycolysis via cytoskeleton architecture. *Nature* **578**, 621-  
922 626 (2020). <https://doi.org/10.1038/s41586-020-1998-1>
- 923 53 Silva, J. A. F., Qi, X., Grant, M. B. & Boulton, M. E. Spatial and temporal VEGF receptor intracellular  
924 trafficking in microvascular and macrovascular endothelial cells. *Sci Rep* **11**, 17400 (2021).  
925 <https://doi.org/10.1038/s41598-021-96964-7>
- 926 54 Sutendra, G. *et al.* A nuclear pyruvate dehydrogenase complex is important for the generation of  
927 acetyl-CoA and histone acetylation. *Cell* **158**, 84-97 (2014).  
928 <https://doi.org/10.1016/j.cell.2014.04.046>
- 929 55 Kofler, N. *et al.* The Rab-effector protein RABEP2 regulates endosomal trafficking to mediate  
930 vascular endothelial growth factor receptor-2 (VEGFR2)-dependent signaling. *J Biol Chem* **293**,  
931 4805-4817 (2018). <https://doi.org/10.1074/jbc.M117.812172>

- 932 56 Zhou, H. J. *et al.* SUMOylation of VEGFR2 regulates its intracellular trafficking and pathological  
933 angiogenesis. *Nat Commun* **9**, 3303 (2018). [https://doi.org:10.1038/s41467-018-05812-2](https://doi.org/10.1038/s41467-018-05812-2)
- 934 57 Buvinic, S. *et al.* P2Y1 and P2Y2 receptor distribution varies along the human placental vascular  
935 tree: role of nucleotides in vascular tone regulation. *The Journal of physiology* **573**, 427-443 (2006).  
936 [https://doi.org:10.1113/jphysiol.2006.105882](https://doi.org/10.1113/jphysiol.2006.105882)
- 937 58 Guan, J. *et al.* Therapeutic Ligands Antagonize Estrogen Receptor Function by Impairing Its  
938 Mobility. *Cell* **178**, 949-963 e918 (2019). [https://doi.org:10.1016/j.cell.2019.06.026](https://doi.org/10.1016/j.cell.2019.06.026)
- 939 59 Mayer, B. *et al.* Vasopressin stimulates the proliferation and differentiation of red blood cell  
940 precursors and improves recovery from anemia. *Science translational medicine* **9** (2017).  
941 [https://doi.org:10.1126/scitranslmed.aao1632](https://doi.org/10.1126/scitranslmed.aao1632)
- 942 60 Lam, L. K. M. *et al.* DNA binding to TLR9 expressed by red blood cells promotes innate immune  
943 activation and anemia. *Science translational medicine* **13**, eabj1008 (2021).  
944 [https://doi.org:10.1126/scitranslmed.abj1008](https://doi.org/10.1126/scitranslmed.abj1008)
- 945 61 Calderon-Garciduenas, L. *et al.* Environmental Nanoparticles Reach Human Fetal Brains.  
946 *Biomedicines* **10** (2022). [https://doi.org:10.3390/biomedicines10020410](https://doi.org/10.3390/biomedicines10020410)
- 947 62 Kerby, A. *et al.* Placental Morphology and Cellular Characteristics in Stillbirths in Women With  
948 Diabetes and Unexplained Stillbirths. *Arch Pathol Lab Med* **145**, 82-89 (2021).  
949 [https://doi.org:10.5858/arpa.2019-0524-OA](https://doi.org/10.5858/arpa.2019-0524-OA)
- 950 63 Li, Y. *et al.* MicroRNA profiling of diabetic atherosclerosis in a rat model. *Eur J Med Res* **23**, 55  
951 (2018). [https://doi.org:10.1186/s40001-018-0354-5](https://doi.org/10.1186/s40001-018-0354-5)
- 952 64 Mancini, F. *et al.* MDM4 actively restrains cytoplasmic mTORC1 by sensing nutrient availability.  
953 *Mol Cancer* **16**, 55 (2017). [https://doi.org:10.1186/s12943-017-0626-7](https://doi.org/10.1186/s12943-017-0626-7)
- 954 65 Amin, M., Wu, R. & Gragnoli, C. Novel Risk Variants in the Oxytocin Receptor Gene (OXTR) Possibly  
955 Linked to and Associated with Familial Type 2 Diabetes. *Int J Mol Sci* **24** (2023).  
956 [https://doi.org:10.3390/ijms24076282](https://doi.org/10.3390/ijms24076282)
- 957 66 Huang, Y. *et al.* Improving immune-vascular crosstalk for cancer immunotherapy. *Nat Rev Immunol*  
958 **18**, 195-203 (2018). [https://doi.org:10.1038/nri.2017.145](https://doi.org/10.1038/nri.2017.145)
- 959 67 Kao, K. C., Vilbois, S., Tsai, C. H. & Ho, P. C. Metabolic communication in the tumour-immune  
960 microenvironment. *Nat Cell Biol* **24**, 1574-1583 (2022). [https://doi.org:10.1038/s41556-022-](https://doi.org/10.1038/s41556-022-01002-x)  
961 [01002-x](https://doi.org/10.1038/s41556-022-01002-x)
- 962 68 Zheng, W. *et al.* Manipulation of the crosstalk between tumor angiogenesis and  
963 immunosuppression in the tumor microenvironment: Insight into the combination therapy of anti-  
964 angiogenesis and immune checkpoint blockade. *Front Immunol* **13**, 1035323 (2022).  
965 [https://doi.org:10.3389/fimmu.2022.1035323](https://doi.org/10.3389/fimmu.2022.1035323)
- 966 69 Spiliopoulos, M. *et al.* Characterizing placental stiffness using ultrasound shear-wave elastography  
967 in healthy and preeclamptic pregnancies. *Arch Gynecol Obstet* **302**, 1103-1112 (2020).  
968 [https://doi.org:10.1007/s00404-020-05697-x](https://doi.org/10.1007/s00404-020-05697-x)
- 969 70 Mancini, F., Giorgini, L., Teveroni, E., Pontecorvi, A. & Moretti, F. Role of Sex in the Therapeutic  
970 Targeting of p53 Circuitry. *Front Oncol* **11**, 698946 (2021).  
971 [https://doi.org:10.3389/fonc.2021.698946](https://doi.org/10.3389/fonc.2021.698946)
- 972 71 Swetzig, W. M., Wang, J. & Das, G. M. Estrogen receptor alpha (ERalpha/ESR1) mediates the p53-  
973 independent overexpression of MDM4/MDMX and MDM2 in human breast cancer. *Oncotarget* **7**,  
974 16049-16069 (2016). [https://doi.org:10.18632/oncotarget.7533](https://doi.org/10.18632/oncotarget.7533)
- 975 72 Berkane, N. *et al.* From Pregnancy to Preeclampsia: A Key Role for Estrogens. *Endocr Rev* **38**, 123-  
976 144 (2017). [https://doi.org:10.1210/er.2016-1065](https://doi.org/10.1210/er.2016-1065)
- 977 73 Jobe, S. O., Tyler, C. T. & Magness, R. R. Aberrant synthesis, metabolism, and plasma accumulation  
978 of circulating estrogens and estrogen metabolites in preeclampsia implications for vascular



- 979 dysfunction. *Hypertension* **61**, 480-487 (2013).  
980 <https://doi.org/10.1161/HYPERTENSIONAHA.111.201624>
- 981 74 Zhu, D., Su, Y., Fu, B. & Xu, H. Magnesium Reduces Blood-Brain Barrier Permeability and Regulates  
982 Amyloid-beta Transcytosis. *Mol Neurobiol* **55**, 7118-7131 (2018). [https://doi.org/10.1007/s12035-](https://doi.org/10.1007/s12035-018-0896-0)  
983 [018-0896-0](https://doi.org/10.1007/s12035-018-0896-0)
- 984 75 Hentschke, M. R. *et al.* Is the atherosclerotic phenotype of preeclamptic placentas due to altered  
985 lipoprotein concentrations and placental lipoprotein receptors? Role of a small-for-gestational-age  
986 phenotype. *J Lipid Res* **54**, 2658-2664 (2013). <https://doi.org/10.1194/jlr.M036699>
- 987 76 Zhang, S., Cao, F., Li, W. & Abumaria, N. TRPM7 kinase activity induces amyloid-beta degradation  
988 to reverse synaptic and cognitive deficits in mouse models of Alzheimer's disease. *Science signaling*  
989 **16**, eade6325 (2023). <https://doi.org/10.1126/scisignal.ade6325>
- 990 77 Ryan, C. P. *et al.* Reproduction predicts shorter telomeres and epigenetic age acceleration among  
991 young adult women. *Sci Rep* **8**, 11100 (2018). <https://doi.org/10.1038/s41598-018-29486-4>
- 992 78 Richmond, R. C., Suderman, M., Langdon, R., Relton, C. L. & Davey Smith, G. DNA methylation as a  
993 marker for prenatal smoke exposure in adults. *Int J Epidemiol* **47**, 1120-1130 (2018).  
994 <https://doi.org/10.1093/ije/dyy091>
- 995 79 Ryan, C. P. *et al.* Immune cell type and DNA methylation vary with reproductive status in women:  
996 possible pathways for costs of reproduction. *Evol Med Public Health* **10**, 47-58 (2022).  
997 <https://doi.org/10.1093/emph/eoac003>
- 998 80 Ghanim, H. *et al.* Reduction in inflammation and the expression of amyloid precursor protein and  
999 other proteins related to Alzheimer's disease following gastric bypass surgery. *J Clin Endocrinol*  
1000 *Metab* **97**, E1197-1201 (2012). <https://doi.org/10.1210/jc.2011-3284>
- 1001 81 Hinney, A. *et al.* Genetic variation at the CELF1 (CUGBP, elav-like family member 1 gene) locus is  
1002 genome-wide associated with Alzheimer's disease and obesity. *Am J Med Genet B Neuropsychiatr*  
1003 *Genet* **165B**, 283-293 (2014). <https://doi.org/10.1002/ajmg.b.32234>
- 1004 82 Behura, S. K. *et al.* The brain-placental axis: Therapeutic and pharmacological relevancy to  
1005 pregnancy. *Pharmacol Res* **149**, 104468 (2019). <https://doi.org/10.1016/j.phrs.2019.104468>
- 1006 83 Mairesse, J. *et al.* Oxytocin receptor agonist reduces perinatal brain damage by targeting microglia.  
1007 *Glia* **67**, 345-359 (2019). <https://doi.org/10.1002/glia.23546>
- 1008 84 Shook, L. L., Sullivan, E. L., Lo, J. O., Perlis, R. H. & Edlow, A. G. COVID-19 in pregnancy: implications  
1009 for fetal brain development. *Trends Mol Med* **28**, 319-330 (2022).  
1010 <https://doi.org/10.1016/j.molmed.2022.02.004>
- 1011 85 Lazarov, T., Juarez-Carreño, S., Cox, N. & Geissmann, F. Physiology and diseases of tissue-resident  
1012 macrophages. *Nature* **618**, 698-707 (2023). <https://doi.org/10.1038/s41586-023-06002-x>
- 1013 86 Erickson, E. N., Myatt, L., Danoff, J. S., Krol, K. M. & Connelly, J. J. Oxytocin receptor DNA  
1014 methylation is associated with exogenous oxytocin needs during parturition and postpartum  
1015 hemorrhage. *Commun Med (Lond)* **3**, 11 (2023). <https://doi.org/10.1038/s43856-023-00244-6>
- 1016 87 Liang, Y., Duan, L., Lu, J. & Xia, J. Engineering exosomes for targeted drug delivery. *Theranostics* **11**,  
1017 3183-3195 (2021). <https://doi.org/10.7150/thno.52570>
- 1018 88 Stelzer, I. A. *et al.* Integrated trajectories of the maternal metabolome, proteome, and immunome  
1019 predict labor onset. *Science translational medicine* **13** (2021).  
1020 <https://doi.org/10.1126/scitranslmed.abd9898>
- 1021 89 Aghaeepour, N. *et al.* An immune clock of human pregnancy. *Sci Immunol* **2** (2017).  
1022 <https://doi.org/10.1126/sciimmunol.aan2946>
- 1023 90 Gomez-Lopez, N. *et al.* Macrophages exert homeostatic actions in pregnancy to protect against  
1024 preterm birth and fetal inflammatory injury. *JCI Insight* **6** (2021).  
1025 <https://doi.org/10.1172/jci.insight.146089>

- 1026 91 Rackaityte, E. & Halkias, J. Mechanisms of Fetal T Cell Tolerance and Immune Regulation. *Front*  
1027 *Immunol* **11**, 588 (2020). <https://doi.org/10.3389/fimmu.2020.00588>
- 1028 92 Miller, D. *et al.* Single-Cell Immunobiology of the Maternal-Fetal Interface. *J Immunol* **209**, 1450-  
1029 1464 (2022). <https://doi.org/10.4049/jimmunol.2200433>
- 1030 93 Braitbard, O., Glickstein, H., Bishara-Shieban, J., Pace, U. & Stein, W. D. Competition between  
1031 bound and free peptides in an ELISA-based procedure that assays peptides derived from protein  
1032 digests. *Proteome Sci* **4**, 12 (2006). <https://doi.org/10.1186/1477-5956-4-12>
- 1033 94 Shevchenko, A., Tomas, H., Havlis, J., Olsen, J. V. & Mann, M. In-gel digestion for mass  
1034 spectrometric characterization of proteins and proteomes. *Nat Protoc* **1**, 2856-2860 (2006).  
1035 <https://doi.org/10.1038/nprot.2006.468>
- 1036 95 Bushway, M. E. *et al.* Morphological and phenotypic analyses of the human placenta using whole  
1037 mount immunofluorescence. *Biol Reprod* **90**, 110 (2014).  
1038 <https://doi.org/10.1095/biolreprod.113.115915>

**Table 1.**

**Clinical characteristics of 47 patients in the study group.**

**A.** Patient samples were labelled with a code consisting of a letter and 1, 2, 5, 6, 7 for non-preeclamptic, 3, 4 for preeclamptic patients or a Ho-number. **B.** Patients Ho-71, Ho-72 and Ho-73 provided placental samples for immunogold electron microscopy.

| A       |           |         |                         |            |      |      |              |    |               |                      |         |                     |
|---------|-----------|---------|-------------------------|------------|------|------|--------------|----|---------------|----------------------|---------|---------------------|
| Patient | Age Range | Gravida | Gestational Age (weeks) | BMI in L&D | Race | cHTN | Preeclampsia | DM | Delivery Mode | Pitocin pre-delivery | Sex F=1 | Neonatal weight (g) |
| H1      | 21-25     | 1       | 38.0                    | 30.0       | 6    | 0    | 0            | 0  | 1             | 1                    | 1       | 2,940               |
| H2      | 21-25     | 2       | 37.0                    | 24.0       | 8    | 0    | 0            | 0  | 1             | NA                   | 2       | 2,590               |
| H3      | 31-35     | 2       | 37.0                    | 32.0       | 8    | 0    | 1            | 0  | 1             | NA                   | 1       | 3,040               |
| I-1     | 21-25     | 3       | 38.0                    | 34.0       | 2    | 0    | 0            | 0  | 3             | 1                    | 2       | 2,631               |
| I-2     | 21-25     | 1       | 42.0                    | 30.0       | 1    | 0    | 0            | 0  | 1             | 1                    | 2       | 3,759               |
| I-3     | 26-30     | 8       | 35.0                    | 34.0       | 2    | 0    | 1            | 2  | 2             | 0                    | 2       | 3,195               |
| I-4     | 18-20     | 1       | 36.6                    | 41.0       | 8    | 0    | 1            | 0  | 3             | 0                    | 1       | 3,335               |
| J-1     | 26-30     | 2       | 39.0                    | 25.0       | 8    | 0    | 0            | 0  | 3             | 0                    | 2       | 3,300               |
| J-2     | 36-40     | 2       | 37.4                    | 22.0       | 1    | 0    | 0            | 0  | 1             | 1                    | 1       | 3,460               |
| J-3     | 26-30     | 3       | 38.5                    | 28.0       | 1    | 0    | 1            | 3  | 3             | 1                    | 2       | 3,630               |
| L1      | 21-25     | 1       | 39.0                    | 24.0       | 3    | 0    | 0            | 0  | 3             | 0                    | 1       | 3,147               |
| L2      | 18-20     | 1       | 39.0                    | 29.0       | 6    | 0    | 0            | 0  | 1             | 1                    | 1       | 2,920               |
| L3      | 21-25     | 3       | 35.0                    | 30.0       | 2    | 0    | 1            | 0  | 2             | 0                    | 2       | 2,235               |
| L4      | 26-30     | 3       | 40.0                    | 29.0       | 8    | 0    | 1            | 0  | 1             | NA                   | 1       | 3,010               |
| M1      | 21-25     | 3       | 40.1                    | 55.0       | 2    | 0    | 0            | 0  | 2             | 0                    | 1       | 3,795               |
| M3      | 18-20     | 2       | 37.0                    | 31.3       | 8    | 0    | 1            | 0  | 2             | 0                    | 1       | 3,490               |
| M4      | 26-30     | 1       | 40.1                    | 39.8       | 8    | 0    | 1            | 0  | 1             | 1                    | 2       | 3,380               |
| N1      | 31-35     | 4       | 39.1                    | 30.0       | 8    | 0    | 0            | 2  | 2             | 0                    | 2       | 3,800               |
| N2      | 31-35     | 2       | 39.3                    | 32.8       | 8    | 0    | 0            | 0  | 2             | 0                    | 1       | 3,180               |
| N3      | 31-35     | 2       | 39.0                    | 35.5       | 8    | 0    | 1            | 0  | 2             | 0                    | 2       | 3,390               |
| N4      | 18-20     | 2       | 36.4                    | 29.5       | 1    | 0    | 1            | 0  | 3             | 1                    | 2       | 3,510               |
| O1      | 21-25     | 2       | 39.3                    | 26.2       | 1    | 0    | 0            | 0  | 4             | 1                    | 1       | 2,960               |
| O2      | 21-25     | 1       | 38.4                    | 34.8       | 1    | 0    | 0            | 0  | 1             | 1                    | 1       | 2,940               |
| O3      | 26-30     | 1       | 37.1                    | 29.5       | 1    | 0    | 1            | 0  | 1             | 1                    | 1       | 2,800               |
| O4      | 21-25     | 3       | 40.3                    | 52.5       | 1    | 0    | 1            | 0  | 3             | 1                    | 2       | 3,575               |
| O5      | 36-40     | 4       | 39.1                    | 50.4       | 8    | 0    | 0            | 3  | 2             | 0                    | 2       | 4,295               |
| O7      | 32-35     | 12      | 39.3                    | 35.2       | 2    | 0    | 0            | 0  | 2             | 0                    | 1       | 3,780               |
| Q1      | 21-25     | 2       | 37.0                    | 47.8       | 1    | 0    | 0            | 3  | 2             | 0                    | 1       | 3,885               |
| Q2      | 31-35     | 4       | 39.1                    | 35.8       | 2    | 0    | 0            | 3  | 2             | 0                    | 1       | 3,390               |
| Q3      | 26-30     | 2       | 37.2                    | 66.7       | 1    | 1    | 1            | 0  | 3             | 1                    | 2       | 3,375               |
| Q4      | 31-35     | 4       | 39.1                    | 77.2       | 2    | 0    | 1            | 3  | 2             | 0                    | 2       | 3,835               |
| R3      | 21-25     | 1       | 37.6                    | 49.5       | 1    | 1    | 1            | 0  | 1             | 1                    | 2       | 2,560               |
| R4      | 26-30     | 4       | 39.1                    | 29.8       | 2    | 0    | 1            | 2  | 3             | 1                    | 1       | 3,960               |
| R5      | 21-25     | 6       | 39.0                    | 30.9       | 2    | 0    | 0            | 0  | 2             | 0                    | 1       | 3,205               |
| S1      | 26-30     | 2       | 37.4                    | 46.2       | 8    | 0    | 0            | 2  | 2             | 0                    | 2       | 4,675               |
| S2      | 26-30     | 3       | 37.5                    | 42.2       | 1    | 0    | 0            | 2  | 2             | 0                    | 1       | 4,600               |
| T1      | 26-30     | 5       | 38.0                    | 41.9       | 1    | 0    | 0            | 2  | 2             | 0                    | 1       | 3,090               |
| T2      | 26-30     | 1       | 39.1                    | 53.3       | 1    | 0    | 0            | 2  | 2             | 0                    | 2       | 3,960               |
| U1      | 31-35     | 3       | 37.1                    | 62.6       | 2    | 1    | 0            | 2  | 2             | 0                    | 2       | 4,440               |
| U2      | 26-30     | 3       | 37.1                    | 52.7       | 1    | 1    | 0            | 2  | 2             | 0                    | 2       | 5,020               |
| V1      | 36-40     | 5       | 37.1                    | 35.5       | 2    | 1    | 0            | 0  | 2             | 0                    | 2       | 2,720               |
| V2      | 36-40     | 2       | 38.4                    | 26.1       | 1    | 0    | 0            | 0  | 2             | 0                    | 2       | 4,150               |
| W1      | 18-20     | 1       | 39.2                    | 30.5       | 1    | 0    | 0            | 0  | 2             | 0                    | 2       | 3,470               |
| W2      | 26-30     | 8       | 37.0                    | 51.7       | 2    | 1    | 0            | 0  | 2             | 0                    | 1       | 3,000               |
| B       |           |         |                         |            |      |      |              |    |               |                      |         |                     |
| Ho-71   | 31-35     | 6       | 37.1                    | N/A        | 2    | 0    | 0            | 0  | 2             | 0                    | 1       | 3,195               |
| Ho-72   | 26-30     | 1       | 39.3                    | 29.4       | 2    |      | 0            | 3  | 2             | NA                   | 1       | 3,400               |
| Ho-73   | 26-30     | 1       | 37.0                    | 29.1       | 8    | 0    | 1            | 0  | 1             | 1                    | 2       | 2,780               |

Abbreviations: *Race*: White 1, Black 2, Asian 3, Hispanic 8, unknown 6. *Chronic hypertension*: cHTN 1. *Preeclampsia* 1. *Diabetes (DM)*: Type-1 1, Type-2 2, Gestational 3. *Delivery mode*: Spontaneous vaginal delivery (SVD) 1, Cesarean delivery (CD) prior to the onset of labor 2, CD after the onset of labor 3, Vaginal birth after CD (VBAC) 4. *Pitocin pre-delivery* 1. *Fetal sex*: Female 1, Male 2. *L&D*: Labor and delivery suite. *NA*, not available. The number of patients in each category were as follows: Diabetes: 30 no, Type-2 9, Gestational 5. Preeclampsia: 28 no, 16 yes. Delivery Mode: SVD 12; CD prior to the onset of labor 23; CD after the onset of labor 9; VBAC 1.

**Table 2**

**Proteins identified in VEGFR2 immunoprecipitations.**

Placental extracts O4, O5, U1, and O7 were immunoprecipitated in one experiment.

| Majority Protein ID | Protein                                           | Gene         | Total Intensity | Intensity VEGFR2 O4 | Intensity VEGFR2 O5 | Intensity VEGFR2 U1 | Intensity VEGFR2 O7 | Peptides |
|---------------------|---------------------------------------------------|--------------|-----------------|---------------------|---------------------|---------------------|---------------------|----------|
| P01857              | Ig gamma-1 chain C region                         | IGHG1        | 24,993,000,000  | 8,554,400,000       | 4,872,000,000       | 4,017,600,000       | 7,549,400,000       | 16       |
| O15151-5            | Protein Mdm4                                      | MDM4         | 14,682,000,000  | 14,638,000,000      | 0                   | 21,714,000          | 22,289,000          | 14       |
| P01834              | Ig kappa chain C region                           | IGKC         | 11,450,000,000  | 1,978,700,000       | 1,363,300,000       | 2,438,900,000       | 5,668,800,000       | 7        |
| A0A0B4J231          | Immunoglobulin lambda-like polypeptide 5;Ig lam   | IGLL5        | 10,336,000,000  | 1,336,300,000       | 2,654,400,000       | 2,053,600,000       | 4,291,800,000       | 4        |
| P01871              | Ig mu chain C region                              | IGHM         | 4,544,300,000   | 2,132,500,000       | 923,280,000         | 706,680,000         | 781,900,000         | 16       |
| P20073-2            | Annexin A7                                        | ANXA7        | 3,045,300,000   | 1,631,900,000       | 402,390,000         | 522,590,000         | 488,400,000         | 19       |
| P01624              | Ig kappa chain V-III region POM                   | IGKV3D-15    | 2,885,700,000   | 707,630,000         | 775,800,000         | 20,798,000          | 1,381,500,000       | 2        |
| A0A286YES1          | Ig gamma-3 chain C region                         | IGHG3        | 2,266,900,000   | 1,322,900,000       | 493,150,000         | 239,480,000         | 211,400,000         | 14       |
| Q9Y6R7              | IgGFc-binding protein                             | FCGBP        | 1,815,700,000   | 1,201,900,000       | 310,570,000         | 246,590,000         | 56,630,000          | 50       |
| J3KT55              | Protein-tyrosine-phosphatase;Receptor-type tyro   | PTPRM        | 1,604,700,000   | 511,350,000         | 129,960,000         | 380,380,000         | 582,970,000         | 1        |
| P01701              | Ig lambda chain V-I region NEW                    | IGLV1-51     | 1,311,400,000   | 193,890,000         | 242,130,000         | 234,850,000         | 640,570,000         | 3        |
| P50995-2            | Annexin A11                                       | ANXA11       | 984,170,000     | 401,780,000         | 125,800,000         | 283,580,000         | 173,010,000         | 18       |
| P01583              | Ig kappa chain V-I region AU                      | IGKV1D-33    | 948,420,000     | 223,440,000         | 220,510,000         | 138,140,000         | 366,330,000         | 2        |
| P01709              | Ig lambda chain V-II region MGC;                  | IGLV2-8      | 640,270,000     | 48,724,000          | 120,690,000         | 169,210,000         | 301,660,000         | 2        |
| P05783              | Keratin, type I cytoskeletal 18                   | KRT18        | 610,030,000     | 342,270,000         | 114,070,000         | 75,571,000          | 78,111,000          | 19       |
| P35968              | Vascular endothelial growth factor receptor 2     | KDR          | 571,130,000     | 132,550,000         | 167,190,000         | 146,080,000         | 125,310,000         | 28       |
| A0A286YEV4          | Ig gamma-2 chain C region                         | IGHG2        | 460,180,000     | 213,440,000         | 63,593,000          | 99,658,000          | 83,492,000          | 13       |
| A0A286YEV1          | Ig alpha-1 chain C region                         | IGHA1        | 403,780,000     | 211,760,000         | 52,913,000          | 85,992,000          | 53,116,000          | 6        |
| Q8WZ42              | Titin                                             | TTN          | 396,070,000     | 215,440,000         | 31,243,000          | 97,005,000          | 52,381,000          | 2        |
| A0A075B6K4          | Ig lambda chain V-IV region Bau                   | IGLV3-10     | 353,630,000     | 0                   | 105,060,000         | 0                   | 248,570,000         | 1        |
| P01602              | Ig kappa chain V-I region HK102                   | IGKV1-5      | 352,740,000     | 23,518,000          | 98,394,000          | 83,336,000          | 147,490,000         | 1        |
| P07355              | Annexin A2;Annexin;Putative annexin A2-like pro   | ANXA2        | 310,810,000     | 50,471,000          | 50,738,000          | 48,427,000          | 161,170,000         | 9        |
| PODP08              | Ig heavy chain V-II region NEWM;Ig heavy chain    | IGHV4-61     | 304,360,000     | 139,200,000         | 44,252,000          | 64,988,000          | 55,917,000          | 2        |
| A0A4W8ZXM2          | Immunoglobulin heavy variable 3-72                | IGHV3-72     | 293,310,000     | 149,140,000         | 29,272,000          | 50,152,000          | 64,749,000          | 3        |
| A0A140T8W4          | Ras/Rap GTPase-activating protein SynGAP          | SYNGAP1      | 288,030,000     | 44,004,000          | 63,931,000          | 66,499,000          | 113,600,000         | 1        |
| P01619              | Ig kappa chain V-III region B6                    | IGKV3D-20    | 270,720,000     | 61,855,000          | 116,270,000         | 75,359,000          | 17,241,000          | 3        |
| A0A0C4DH42          | Ig heavy chain V-III region BUT;Ig heavy chain V  | IGHV3-66     | 262,750,000     | 165,010,000         | 39,894,000          | 44,120,000          | 13,734,000          | 3        |
| A0A087WW87          | Ig kappa chain V-II region FR;Ig kappa chain V-II | IGKV2-40     | 253,710,000     | 36,751,000          | 64,720,000          | 43,474,000          | 108,760,000         | 3        |
| P59666              | Neutrophil defensin 3;HP 3-56;Neutrophil defens   | DEFA3        | 216,520,000     | 69,150,000          | 64,470,000          | 3,576,200           | 79,326,000          | 3        |
| P69905              | Hemoglobin subunit alpha                          | HBA1         | 215,170,000     | 0                   | 0                   | 7,679,400           | 207,490,000         | 3        |
| P68871              | Hemoglobin subunit beta;LVV-hemorphin-7;Spin      | HBB          | 212,010,000     | 31,855,000          | 0                   | 8,761,200           | 171,400,000         | 5        |
| A0A2R8Y804          | Catenin beta-1                                    | CTNNA1       | 209,290,000     | 166,480,000         | 20,293,000          | 22,516,000          | 0                   | 1        |
| H0Y2X5              | Aldehyde dehydrogenase family 1 member A3         | ALDH1A3      | 208,040,000     | 81,161,000          | 28,288,000          | 92,767,000          | 5,824,900           | 1        |
| P0DOY3              | Ig lambda-6 chain C region;Ig lambda-7 chain C    | IGLC6        | 206,310,000     | 71,942,000          | 14,393,000          | 49,459,000          | 70,513,000          | 3        |
| P17931              | Galectin-3;Galectin                               | LGALS3       | 177,750,000     | 8,812,900           | 12,846,000          | 37,357,000          | 118,730,000         | 4        |
| P60709              | Actin, cytoplasmic 1;Actin, cytoplasmic 1, N-term | ACTB         | 169,720,000     | 77,252,000          | 11,135,000          | 41,447,000          | 39,882,000          | 7        |
| PODP03              | Ig heavy chain V-III region CAM;Ig heavy chain V  | IGHV3-23     | 161,210,000     | 84,420,000          | 37,310,000          | 16,539,000          | 22,945,000          | 3        |
| P08670              | Vimentin                                          | VIM          | 138,160,000     | 72,126,000          | 18,191,000          | 31,138,000          | 16,707,000          | 14       |
| A0A0A0MRZ8          | Ig kappa chain V-III region VG                    | IGKV3D-11    | 111,170,000     | 34,909,000          | 76,260,000          | 0                   | 0                   | 1        |
| A0A075B6K5          | Ig lambda chain V-III region LOI                  | IGLV3-9      | 96,087,000      | 25,060,000          | 23,281,000          | 14,993,000          | 32,753,000          | 1        |
| A0A286YFJ8          | Ig gamma-4 chain C region                         | IGHG4        | 87,485,000      | 47,260,000          | 30,192,000          | 1,565,900           | 8,467,600           | 9        |
| A0A075B6Z5          | T cell receptor alpha joining 4                   | TRAJ4        | 81,903,000      | 16,074,000          | 21,003,000          | 0                   | 44,826,000          | 1        |
| Q96Q89-4            | Kinesin-like protein KIF20B                       | KIF20B       | 80,885,000      | 35,045,000          | 8,063,900           | 37,776,000          | 0                   | 1        |
| P31942-3            | Heterogeneous nuclear ribonucleoprotein H3        | HNRNPH3      | 80,200,000      | 14,536,000          | 9,591,700           | 10,848,000          | 45,224,000          | 4        |
| PODP01              | Ig heavy chain V-I region HG3;Ig heavy chain V-I  | IGHV1-3      | 75,366,000      | 33,904,000          | 12,319,000          | 16,686,000          | 12,457,000          | 1        |
| C9JA05              | Immunoglobulin J chain                            | JCHAIN       | 74,956,000      | 6,239,800           | 24,681,000          | 8,971,600           | 35,063,000          | 1        |
| A6N108              | Putative methyl-CpG-binding domain protein 3-lik  | MBD3L5       | 72,585,000      | 0                   | 0                   | 72,585,000          | 0                   | 1        |
| Q43866              | CD5 antigen-like                                  | CD5L         | 67,251,000      | 6,765,200           | 12,049,000          | 0                   | 48,437,000          | 3        |
| A0A075B6H9          | Immunoglobulin lambda variable 4-69               | IGLV4-69     | 66,271,000      | 0                   | 23,139,000          | 15,467,000          | 27,664,000          | 1        |
| A0A0C4DH31          | Ig heavy chain V-I region V35                     | IGHV1-18     | 66,003,000      | 33,480,000          | 6,768,000           | 14,275,000          | 11,480,000          | 1        |
| Q8I241              | Ras and EF-hand domain-containing protein         | RASEF        | 63,614,000      | 0                   | 0                   | 0                   | 63,614,000          | 2        |
| Q5JTQ6              | Alpha-catulin                                     | CTNNA1       | 57,823,000      | 0                   | 0                   | 0                   | 57,823,000          | 1        |
| S4R460              | Immunoglobulin heavy variable 3/OR16-9            | IGHV3OR16-9  | 55,031,000      | 38,287,000          | 3,882,000           | 8,163,400           | 4,697,800           | 3        |
| P31943              | Heterogeneous nuclear ribonucleoprotein H;Hete    | HNRNPH1      | 53,003,000      | 27,450,000          | 6,928,200           | 12,581,000          | 6,044,000           | 8        |
| P01700              | Ig lambda chain V-I region HA                     | IGLV1-47     | 52,593,000      | 4,428,100           | 9,274,400           | 10,578,000          | 28,313,000          | 2        |
| P69892              | Hemoglobin subunit gamma-2;Hemoglobin subur       | HBG2         | 51,210,000      | 4,832,700           | 6,432,400           | 4,039,100           | 35,906,000          | 2        |
| Q01469              | Fatty acid-binding protein, epidermal             | FABP5        | 49,218,000      | 9,923,200           | 8,054,700           | 6,476,700           | 24,764,000          | 1        |
| A0A0C4DH38          | Immunoglobulin heavy variable 5-51                | IGHV5-51     | 47,777,000      | 21,306,000          | 9,176,600           | 9,526,200           | 7,768,200           | 2        |
| P06312              | Ig kappa chain V-IV region                        | IGKV4-1      | 45,342,000      | 3,210,900           | 8,777,500           | 9,179,900           | 24,174,000          | 2        |
| A0A075B7B8          | Immunoglobulin heavy variable 3/OR16-12           | IGHV3OR16-12 | 42,463,000      | 23,390,000          | 6,964,700           | 8,836,000           | 3,272,300           | 2        |
| D6RF44              | Heterogeneous nuclear ribonucleoprotein D0        | HNRNPD       | 42,167,000      | 25,423,000          | 6,531,800           | 3,981,200           | 6,231,100           | 2        |
| P12314              | High affinity immunoglobulin gamma Fc receptor    | FCGR1A       | 41,035,000      | 21,744,000          | 3,306,900           | 13,766,000          | 2,217,200           | 4        |
| A0A075B6I0          | Immunoglobulin lambda variable 8-61               | IGLV8-61     | 36,318,000      | 0                   | 15,369,000          | 0                   | 20,949,000          | 1        |
| P01023              | Alpha-2-macroglobulin                             | A2M          | 34,428,000      | 24,712,000          | 0                   | 5,408,900           | 4,307,000           | 9        |
| M0R1R1              | Serine/threonine-protein kinase PAK 4             | PAK4         | 33,472,000      | 0                   | 0                   | 33,472,000          | 0                   | 1        |
| A0A1C7CYZ1          | Mitogen-activated protein kinase 15               | MAPK15       | 33,062,000      | 6,944,400           | 14,185,000          | 7,347,000           | 4,586,000           | 1        |
| A0A0C4DGL8          | Haptoglobin;Haptoglobin alpha chain;Haptoglobi    | HP           | 32,080,000      | 0                   | 0                   | 0                   | 32,080,000          | 2        |
| P05109              | Protein S100-A8;Protein S100-A8, N-terminally p   | S100A8       | 29,241,000      | 14,931,000          | 0                   | 10,002,000          | 4,308,000           | 2        |
| Q03135              | Caveolin-1;Caveolin                               | CAV1         | 28,128,000      | 0                   | 0                   | 0                   | 28,128,000          | 2        |
| P01714              | Ig lambda chain V-III region SH                   | IGLV3-19     | 26,041,000      | 4,373,400           | 0                   | 0                   | 21,668,000          | 1        |
| P19474              | E3 ubiquitin-protein ligase TRIM21                | TRIM21       | 25,255,000      | 18,886,000          | 4,813,800           | 1,555,300           | 0                   | 4        |
| P62979              | Ubiquitin-40S ribosomal protein S27a;Ubiquitin;4  | RPS27A       | 25,055,000      | 1,656,300           | 2,801,700           | 7,174,300           | 13,423,000          | 2        |
| P81605              | Dermcidin;Survival-promoting peptide;DCD-1        | DCD          | 22,842,000      | 12,716,000          | 3,502,900           | 0                   | 6,623,700           | 2        |
| P52594-2            | Arf-GAP domain and FG repeat-containing protei    | ACFG1        | 22,167,000      | 16,991,000          | 2,315,700           | 2,860,400           | 0                   | 1        |
| A0A0C4DH35          | Probable non-functional immunoglobulin            | IGHV3-35     | 20,964,000      | 12,648,000          | 3,344,000           | 2,850,000           | 2,122,100           | 1        |
| Q86VF2-5            | Isoform 5 of Immunoglobulin-like                  | IGFN1        | 20,453,000      | 0                   | 0                   | 0                   | 20,453,000          | 1        |
| K7EJT5              | 60S ribosomal protein L22                         | RPL22        | 18,553,000      | 4,268,800           | 0                   | 0                   | 14,284,000          | 2        |
| A0A0A0MSV6          | Complement C1q subcomponent subunit B             | C1QB         | 18,258,000      | 0                   | 6,523,400           | 0                   | 11,734,000          | 2        |
| A0A075B6K0          | Ig lambda chain V-IV region Hii;Ig lambda chain   | IGLV3-16     | 18,172,000      | 0                   | 4,095,500           | 3,407,600           | 10,669,000          | 1        |
| P06702              | Protein S100-A9                                   | S100A9       | 17,656,000      | 10,525,000          | 0                   | 7,131,300           | 0                   | 2        |
| F8W0I9              | Microspherule protein 1                           | MCRS1        | 16,973,000      | 16,973,000          | 0                   | 0                   | 0                   | 1        |
| P48741              | Putative heat shock 70 kDa protein 7;Heat shock   | HSPA7        | 15,835,000      | 7,272,600           | 1,230,000           | 4,196,900           | 3,135,800           | 2        |

|            |                                                    |           |            |            |           |           |            |   |
|------------|----------------------------------------------------|-----------|------------|------------|-----------|-----------|------------|---|
| P04430     | Ig kappa chain V-I region BAN                      | IGKV1-16  | 15,155,000 | 0          | 1,349,600 | 3,349,700 | 10,456,000 | 1 |
| O75594     | Peptidoglycan recognition protein 1                | PGLYRP1   | 14,595,000 | 2,156,900  | 2,885,000 | 0         | 9,552,700  | 1 |
| P01599     | Ig kappa chain V-I region Gal                      | IGKV1-17  | 14,133,000 | 1,638,200  | 1,801,900 | 5,586,300 | 5,106,400  | 1 |
| A0A6Q8PHQ9 | Prelamin-A/C;Lamin-A/C                             | LMNA      | 13,477,000 | 10,473,000 | 0         | 990,760   | 2,014,100  | 3 |
| F8WCU1     | Coiled-coil domain-containing protein 150          | CCDC150   | 13,165,000 | 13,165,000 | 0         | 0         | 0          | 1 |
| P11021     | 78 kDa glucose-regulated protein                   | HSPA5     | 12,097,000 | 12,097,000 | 0         | 0         | 0          | 3 |
| P10515     | Dihydrolypolyllysine-residue acetyltransferase cor | DLAT      | 11,577,000 | 0          | 0         | 0         | 11,577,000 | 2 |
| A0A0C4DH73 | Ig kappa chain V-I region Daudi;Ig kappa chain v   | IGKV1-12  | 11,157,000 | 4,228,600  | 3,358,000 | 0         | 3,570,100  | 1 |
| Q02413     | Desmoglein-1                                       | DSG1      | 11,044,000 | 6,539,700  | 4,504,100 | 0         | 0          | 4 |
| A0A2R8Y851 | 40S ribosomal protein S29                          | RPS29     | 10,819,000 | 0          | 0         | 0         | 10,819,000 | 1 |
| E9PHT9     | Annexin;Annexin A5                                 | ANXA5     | 10,757,000 | 0          | 0         | 0         | 10,757,000 | 2 |
| P01766     | Ig heavy chain V-III region BRO                    | IGHV3-13  | 9,742,100  | 6,872,500  | 2,869,600 | 0         | 0          | 3 |
| I3L0Q1     | CREB-binding protein;Histone acetyltransferase     | CREBBP    | 9,408,100  | 9,408,100  | 0         | 0         | 0          | 2 |
| A0A0A0MT36 | Immunoglobulin kappa variable 6D-21                | IGKV6D-21 | 9,327,900  | 0          | 0         | 0         | 9,327,900  | 1 |
| P35030-5   | Trypsin-3                                          | PRSS3     | 8,538,700  | 4,010,200  | 0         | 0         | 4,528,500  | 1 |
| P02747     | Complement C1q subcomponent subunit C              | C1QC      | 8,466,800  | 0          | 6,587,500 | 1,879,200 | 0          | 2 |
| A0A0B4J1V0 | Immunoglobulin heavy variable 3-15                 | IGHV3-15  | 8,461,900  | 2,460,400  | 6,001,500 | 0         | 0          | 2 |
| C9JD14     | Guanine nucleotide-binding protein G(I)/G(S)/G(    | GNB4      | 8,022,200  | 0          | 0         | 0         | 8,022,200  | 1 |
| A0A0C4DH68 | Immunoglobulin kappa variable 2-24                 | IGKV2-24  | 7,515,800  | 7,515,800  | 0         | 0         | 0          | 2 |
| Q5T3N1     | Annexin;Annexin A1                                 | ANXA1     | 7,426,700  | 1,331,300  | 0         | 803,800   | 5,291,600  | 2 |
| A0A0A0MRA5 | Heterogeneous nuclear ribonucleoprotein U-like     | HNRNPUL1  | 6,653,000  | 6,653,000  | 0         | 0         | 0          | 3 |
| P0DP04     | Ig heavy chain V-III region DOB                    | IGHV3-43D | 6,600,800  | 0          | 3,028,100 | 3,572,700 | 0          | 3 |
| P02675     | Fibrinogen beta chain;Fibrinopeptide B;Fibrinoge   | FGB       | 6,128,300  | 6,128,300  | 0         | 0         | 0          | 2 |
| Q9NZT1     | Calmodulin-like protein 5                          | CALML5    | 6,023,300  | 1,202,800  | 0         | 4,408,400 | 412,040    | 3 |
| A0A0C4DH67 | Immunoglobulin kappa variable 1-8                  | IGKV1-8   | 5,877,100  | 2,421,000  | 3,456,100 | 0         | 0          | 1 |
| A0A2R8YD12 | Serpin B6                                          | SERPINB6  | 5,710,400  | 5,710,400  | 0         | 0         | 0          | 1 |
| A0A0A0MRQ5 | Peroxioredoxin-2;Peroxioredoxin-1                  | PRDX1     | 5,706,700  | 0          | 0         | 2,361,100 | 3,345,600  | 1 |
| Q5VVL7     | Lipoamide acyltransferase component of branche     | DBT       | 5,612,200  | 3,395,200  | 0         | 2,217,000 | 0          | 1 |
| P06310     | Ig kappa chain V-II region RPMI 6410               | IGKV2-30  | 5,336,000  | 0          | 0         | 2,017,100 | 3,318,900  | 2 |
| P50991     | T-complex protein 1 subunit delta                  | CCT4      | 4,474,800  | 0          | 0         | 0         | 4,474,800  | 1 |
| A0A0C4DH36 | Probable non-functional immunoglobulin heavy v     | IGHV3-38  | 4,238,600  | 0          | 4,238,600 | 0         | 0          | 2 |
| P47929     | Galectin-7                                         | LGALS7    | 4,195,800  | 0          | 0         | 1,755,800 | 2,440,000  | 3 |
| B4E1S2     | Annexin;Annexin A4                                 | ANXA4     | 4,022,500  | 0          | 0         | 0         | 4,022,500  | 1 |
| E7ETU5     | RNA-binding motif, single-stranded-interacting pr  | RBMS1     | 3,858,200  | 2,150,500  | 0         | 1,707,700 | 0          | 2 |
| I3L1P8     | Mitochondrial 2-oxoglutarate/malate carrier prote  | SLC25A11  | 3,820,000  | 0          | 0         | 0         | 3,820,000  | 1 |
| Q71U36-2   | Tubulin alpha-1A chain;Tubulin alpha-1B chain;T    | TUBA1A    | 3,782,000  | 3,782,000  | 0         | 0         | 0          | 2 |
| D6R9P3     | Heterogeneous nuclear ribonucleoprotein A/B        | HNRNPAB   | 3,571,200  | 3,120,400  | 0         | 450,800   | 0          | 2 |
| E9PJT1     | Phosphatidylinositol-binding clathrin assembly pr  | PICALM    | 3,561,800  | 3,561,800  | 0         | 0         | 0          | 1 |
| A0A0B4J1V6 | Immunoglobulin heavy variable 3-73                 | IGHV3-73  | 3,460,100  | 0          | 1,501,600 | 1,958,600 | 0          | 3 |
| P14923     | Junction plakoglobin                               | JUP       | 3,261,700  | 2,178,900  | 0         | 0         | 1,082,900  | 3 |
| Q5T749     | Keratinocyte proline-rich protein                  | KPRP      | 3,196,400  | 3,196,400  | 0         | 0         | 0          | 2 |
| P15924     | Desmoplakin                                        | DSP       | 2,976,300  | 0          | 2,479,300 | 0         | 497,000    | 3 |
| E9PKD2     | Nuclear pore complex protein Nup214                | NUP214    | 2,854,500  | 1,488,400  | 1,366,100 | 0         | 0          | 1 |
| B3KV94     | Lysine-specific demethylase 5B                     | KDM5B     | 2,598,600  | 0          | 2,598,600 | 0         | 0          | 1 |
| P78406     | mRNA export factor                                 | RAE1      | 2,408,100  | 2,408,100  | 0         | 0         | 0          | 1 |
| P17661     | Desmin                                             | DES       | 2,140,500  | 0          | 0         | 1,047,300 | 1,093,200  | 4 |
| P31994-5   | Low affinity immunoglobulin gamma Fc               | FCGR2B    | 2,042,300  | 0          | 2,042,300 | 0         | 0          | 1 |
| A0A087WT15 | N-acetylglucosaminylidiphosphodolichol             | ALG13     | 1,878,000  | 0          | 1,878,000 | 0         | 0          | 1 |
| P31944     | Caspase-14;Caspase-14 subunit p17, mature for      | CASP14    | 880,720    | 0          | 880,720   | 0         | 0          | 1 |
| A0A3B3ISA6 | Complement C4-A;Complement C4 beta chain;C4        | C4B       | 664,880    | 0          | 0         | 0         | 664,880    | 1 |

**Table 3**  
**Proteins identified in MDMX immunoprecipitations (IP).**  
 Protein extracts O1, O4, O6, O1, O4, and R4 were immunoprecipitated in one experiment.

| Unique to MDMX IP | Common to all IP | Majority protein ID | Protein                                                  | Gene         | Total Intensity | Intensity MDMX O1 | Intensity MDMX O4 | Intensity MDMX O6 | Intensity MDMX O1 | Intensity MDMX O4 | Intensity MDMX R4 | Peptides |
|-------------------|------------------|---------------------|----------------------------------------------------------|--------------|-----------------|-------------------|-------------------|-------------------|-------------------|-------------------|-------------------|----------|
|                   |                  | P01857              | Ig gamma-1 chain C region                                | IGHG1        | 172,120,000.00  | 22,238,000.00     | 2,879,300.00      | 4,953,400.00      | 85,828,000.00     | 8,388,500.00      | 47,830,000.00     | 17       |
|                   | Yes              | P68871              | Hemoglobin subunit beta                                  | HBH          | 49,360,000.00   | 2,016,400.00      | 36,158,000.00     | 924,450.00        | 902,880.00        | 6,065,100.00      | 3,293,300.00      | 14       |
|                   | Yes              | P69905              | Hemoglobin subunit alpha                                 | HBA1         | 46,601,000.00   | 3,529,000.00      | 26,425,000.00     | 1,616,500.00      | 1,416,300.00      | 6,485,900.00      | 7,128,000.00      | 15       |
|                   |                  | P20073-2            | Annexin A7                                               | ANXA7        | 25,375,000.00   | 5,386,800.00      | 1,897,400.00      | 6,836,600.00      | 2,658,100.00      | 3,368,800.00      | 5,226,900.00      | 31       |
|                   | Yes              | Q0Y6R7              | IgG-Fc-binding protein                                   | FCGBP        | 19,471,000.00   | 6,976,500.00      | 5,284,100.00      | 2,450,000.00      | 1,183,900.00      | 470,780.00        | 3,105,900.00      | 75       |
|                   |                  | P81805              | Dermicidin:Survival-promoting peptide:DCCD-1             | DCCD         | 11,575,000.00   | 2,289,500.00      | 1,337,700.00      | 2,158,100.00      | 2,832,500.00      | 965,260.00        | 1,971,800.00      | 9        |
|                   |                  | P50995              | Annexin A1                                               | ANXA11       | 11,312,000.00   | 478,000.00        | 1,687,700.00      | 1,675,600.00      | 1,407,600.00      | 3,235,200.00      | 2,827,400.00      | 22       |
|                   | Yes              | P01871              | Ig mu chain C region                                     | IGHM         | 10,253,000.00   | 2,115,600.00      | 3,548,100.00      | 788,140.00        | 926,840.00        | 1,253,200.00      | 1,620,700.00      | 18       |
|                   |                  | P63261              | Actin, cytoplasmic 2                                     | ACTG1        | 7,787,800.00    | 669,640.00        | 2,068,500.00      | 955,900.00        | 645,430.00        | 2,563,700.00      | 884,630.00        | 16       |
|                   | Yes              | P69892              | Hemoglobin subunit gamma-2                               | HBG2         | 7,148,400.00    | 1,386,800.00      | 780,010.00        | 795,220.00        | 661,950.00        | 5,600,500.00      | 3,063,800.00      | 12       |
|                   | Yes              | P55072              | Transitional endoplasmic reticulum ATPase                | VCP          | 4,620,000.00    | 185,550.00        | 758,330.00        | 1,565,000.00      | 411,970.00        | 553,090.00        | 1,146,000.00      | 39       |
|                   | Yes              | P07355              | Annexin A2:Annexin:Putative annexin A2-like              | ANXA2        | 4,497,800.00    | 586,000.00        | 417,330.00        | 1,170,600.00      | 722,980.00        | 573,440.00        | 1,027,400.00      | 24       |
|                   | Yes              | P15924              | Desmoplakin                                              | DSP          | 4,032,200.00    | 407,760.00        | 397,430.00        | 777,640.00        | 503,940.00        | 1,011,000.00      | 871,340.00        | 71       |
|                   | Yes              | Q02413              | Desmoglein-1                                             | DSG1         | 3,842,500.00    | 671,480.00        | 532,380.00        | 484,300.00        | 578,340.00        | 684,390.00        | 891,590.00        | 23       |
|                   | Yes              | P01834              | Ig kappa chain C region                                  | IGKC         | 3,261,700.00    | 842,260.00        | 1,005,100.00      | 115,500.00        | 198,480.00        | 706,400.00        | 393,970.00        | 8        |
|                   | Yes              | P08670              | Vimentin                                                 | VIM          | 3,157,700.00    | 489,550.00        | 337,990.00        | 734,410.00        | 251,720.00        | 392,940.00        | 951,130.00        | 25       |
|                   |                  | AOA0C4DH90          | Ig kappa chain V-III region POM                          | IGKV3OR2-268 | 2,570,200.00    | 1,897,100.00      | 0                 | 13,227.00         | 0                 | 225,870.00        | 434,010.00        | 1        |
|                   | Yes              | V9HW50              | Alcohol dehydrogenase 1B                                 | HEL-S-117    | 2,525,500.00    | 0                 | 2,445,000.00      | 0                 | 0                 | 80,447.00         | 0                 | 17       |
|                   | Yes              | P17931              | Galectin-3:Galectin                                      | LGALS3       | 2,429,700.00    | 1,214,100.00      | 169,570.00        | 378,710.00        | 177,170.00        | 77,588.00         | 412,490.00        | 8        |
|                   | Yes              | Q08554-2            | Desmocollin-1                                            | DSC1         | 2,289,200.00    | 409,040.00        | 260,520.00        | 496,130.00        | 269,620.00        | 267,980.00        | 585,960.00        | 11       |
|                   | Yes              | P0D0Y3              | Ig lambda-1 chain C regions                              | IGLC1        | 2,060,500.00    | 902,940.00        | 302,390.00        | 106,470.00        | 55,564.00         | 332,740.00        | 360,390.00        | 6        |
|                   | Yes              | P14923              | Junction plakoglobin                                     | JUP          | 1,729,100.00    | 212,940.00        | 113,640.00        | 343,050.00        | 269,710.00        | 404,730.00        | 385,000.00        | 15       |
|                   | Yes              | Q8NSG2-2            | Macolin                                                  | MACO1        | 1,591,700.00    | 99,254.00         | 476,890.00        | 450,010.00        | 308,790.00        | 0                 | 266,730.00        | 2        |
|                   |                  | Q5T749              | Keratinocyte proline-rich protein                        | KPRP         | 1,575,500.00    | 330,330.00        | 1,167,300.00      | 226,220.00        | 285,640.00        | 313,090.00        | 278,590.00        | 12       |
|                   | Yes              | P19474              | E3 ubiquitin-protein ligase TRIM21                       | TRIM21       | 1,493,600.00    | 373,480.00        | 221,830.00        | 137,660.00        | 252,360.00        | 260,040.00        | 248,270.00        | 10       |
|                   | Yes              | Q0N2T1              | Calmodulin-like protein 5                                | CALML5       | 1,415,300.00    | 243,820.00        | 182,070.00        | 222,180.00        | 153,060.00        | 70,118.00         | 544,030.00        | 5        |
|                   |                  | P04083              | Annexin A1:Annexin                                       | ANXA1        | 1,402,800.00    | 51,347.00         | 99,256.00         | 209,080.00        | 80,360.00         | 733,430.00        | 229,300.00        | 12       |
|                   | Yes              | P02647              | Apolipoprotein A-I:Proapolipoprotein A-I                 | APOA1        | 1,331,000.00    | 11,399.00         | 117,700.00        | 5,319.00          | 16,475.00         | 1,162,800.00      | 17,217.00         | 10       |
|                   | Yes              | AOA3B3IS80          | Fructose-bisphosphate aldolase B                         | ALDOB        | 1,149,700.00    | 0                 | 1,053,900.00      | 0                 | 0                 | 95,806.00         | 0                 | 15       |
|                   |                  | P04406              | Glyceroldehyde-3-phosphate dehydrogenase                 | GAPDH        | 1,024,600.00    | 45,228.00         | 381,510.00        | 144,970.00        | 70,343.00         | 219,600.00        | 162,960.00        | 13       |
|                   | Yes              | AOA286YE1           | Ig gamma-3 chain C region                                | IGHG3        | 1,009,000.00    | 136,810.00        | 318,110.00        | 154,420.00        | 99,280.00         | 160,810.00        | 137,620.00        | 15       |
|                   | Yes              | P02675              | Fibrinogen beta chain                                    | FBH          | 987,840.00      | 3,484.00          | 109,660.00        | 9,669.00          | 0                 | 843,190.00        | 21,839.00         | 8        |
|                   |                  | AOA5F3ZH78          | Arginase-1                                               | ARG1         | 985,040.00      | 29,882.00         | 296,130.00        | 165,080.00        | 133,750.00        | 191,750.00        | 168,450.00        | 7        |
|                   |                  | P04040              | Catalase                                                 | CAT          | 883,310.00      | 55,685.00         | 377,410.00        | 124,610.00        | 80,278.00         | 132,340.00        | 112,980.00        | 10       |
|                   | Yes              | AOA286YE1           | Ig alpha-1 chain C region                                | IGHA1        | 816,250.00      | 19,070.00         | 323,900.00        | 34,146.00         | 95,177.00         | 136,490.00        | 207,470.00        | 11       |
|                   | Yes              | P01023              | Alpha-2-macroglobulin                                    | A2M          | 764,980.00      | 22,095.00         | 427,860.00        | 9,797.40          | 18,372.00         | 162,150.00        | 124,700.00        | 19       |
|                   | Yes              | Q2LE68              | Corneodesmosin                                           | CDSN         | 755,530.00      | 85,379.00         | 142,160.00        | 258,560.00        | 81,346.00         | 84,291.00         | 103,800.00        | 5        |
|                   | Yes              | P11021              | 78 kDa glucose-regulated protein                         | HSPA5        | 754,080.00      | 73,659.00         | 267,450.00        | 111,330.00        | 14,914.00         | 122,090.00        | 164,640.00        | 19       |
|                   |                  | Q14103-3            | Heterogeneous nuclear ribonucleoprotein D0               | HNRNPD       | 743,760.00      | 190,940.00        | 159,680.00        | 172,750.00        | 62,051.00         | 75,439.00         | 82,904.00         | 7        |
|                   | Yes              | QB8460              | Ig heavy chain V-III region BRO                          | IGHV3OR9-9   | 1,575,500.00    | 77,631.00         | 167,330.00        | 68,300.00         | 164,380.00        | 145,800.00        | 114,500.00        | 2        |
|                   | Yes              | Q8N257              | Histone H2B type 3-B                                     | HIST3H2BB    | 735,150.00      | 68,866.00         | 97,720.00         | 133,440.00        | 90,551.00         | 222,990.00        | 121,590.00        | 4        |
|                   |                  | P02671              | Fibrinogen alpha chain:Fibrinopeptide A                  | FGA          | 727,500.00      | 0                 | 39,906.00         | 0                 | 0                 | 687,600.00        | 0                 | 20       |
|                   | Yes              | HOY9N0              | Alcohol dehydrogenase 4                                  | ADH4         | 720,950.00      | 0                 | 690,910.00        | 0                 | 0                 | 30,039.00         | 0                 | 13       |
|                   | Yes              | AOA6Q8PFJ0          | Pretamin-A/C:Lamin-A/C                                   | LMNA         | 692,900.00      | 124,240.00        | 137,300.00        | 102,670.00        | 16,496.00         | 157,450.00        | 154,750.00        | 15       |
|                   | Yes              | P31327              | Carbamoyl-phosphate synthase [ammonia], mitochondrial    | CPS1         | 684,130.00      | 0                 | 639,470.00        | 0                 | 0                 | 44,665.00         | 0                 | 22       |
|                   |                  | P02787              | Serotransferrin                                          | TF           | 652,910.00      | 0                 | 470,270.00        | 0                 | 0                 | 146,010.00        | 36,628.00         | 17       |
|                   | Yes              | Q01469              | Fatty acid-binding protein, epidermal                    | FABP5        | 620,650.00      | 95,889.00         | 59,613.00         | 208,230.00        | 97,652.00         | 68,443.00         | 90,819.00         | 6        |
|                   | Yes              | QB87M1              | Histone H2A.1                                            | H2AFJ        | 616,220.00      | 134,230.00        | 164,340.00        | 41,711.00         | 94,091.00         | 86,576.00         | 95,268.00         | 3        |
|                   | Yes              | P02942              | Hemoglobin subunit delta                                 | HBD          | 608,730.00      | 5,412.70          | 569,100.00        | 0                 | 0                 | 34,217.00         | 0                 | 11       |
|                   | Yes              | P31943              | Heterogeneous nuclear ribonucleoprotein H                | HNRNPH1      | 586,320.00      | 235,200.00        | 40,807.00         | 91,509.00         | 52,962.00         | 116,480.00        | 49,360.00         | 10       |
|                   | Yes              | Q15007              | Pre-mRNA-splicing regulator WTAP                         | WTAP         | 585,670.00      | 146,160.00        | 79,564.00         | 83,145.00         | 52,450.00         | 83,328.00         | 139,020.00        | 11       |
|                   | Yes              | ETETU5              | RNA-binding motif, single-stranded-interacting protein 1 | RBMS1        | 582,990.00      | 101,720.00        | 109,470.00        | 87,943.00         | 47,975.00         | 117,990.00        | 117,880.00        | 4        |
|                   | Yes              | F8VZY9              | Keratin, type I cytoskeletal 18                          | KRT18        | 508,470.00      | 182,680.00        | 57,886.00         | 98,079.00         | 48,183.00         | 67,435.00         | 54,210.00         | 11       |
|                   | Yes              | P01024              | Complement C3:Complement C3 beta chain                   | C3           | 484,020.00      | 0                 | 112,750.00        | 0                 | 0                 | 371,270.00        | 0                 | 18       |
|                   | Yes              | F5H5D3              | Tubulin alpha-1C chain:Tubulin alpha-1B chain            | TUBA1C       | 478,170.00      | 54,611.00         | 141,340.00        | 66,825.00         | 35,734.00         | 118,870.00        | 60,793.00         | 7        |
|                   | Yes              | C9JEU5              | Fibrinogen gamma chain                                   | FGG          | 455,740.00      | 0                 | 79,865.00         | 2,023.40          | 0                 | 368,680.00        | 5,169.50          | 8        |
|                   | Yes              | P31942-2            | Heterogeneous nuclear ribonucleoprotein H3               | HNRNPH3      | 434,350.00      | 48,222.00         | 34,000.00         | 133,620.00        | 77,527.00         | 103,460.00        | 51,716.00         | 7        |
|                   | Yes              | AOA286YE4           | Ig gamma-2 chain C region                                | IGHG2        | 432,350.00      | 114,780.00        | 109,100.00        | 83,334.00         | 18,798.00         | 68,437.00         | 37,904.00         | 10       |
|                   | Yes              | P06733              | Alpha-enolase                                            | ENO1         | 410,010.00      | 29,654.00         | 202,800.00        | 42,689.00         | 15,683.00         | 119,190.00        | 0                 | 12       |
|                   | Yes              | EP9GY2              | Dynein assembly factor 5, axonemal                       | DNAAF5       | 404,800.00      | 19,772.00         | 183,310.00        | 67,144.00         | 0                 | 69,246.00         | 65,333.00         | 10       |
|                   | Yes              | ESRHP7              | Carbonic anhydrase 1                                     | CA1          | 401,260.00      | 0                 | 391,980.00        | 0                 | 0                 | 9,284.60          | 0                 | 8        |
|                   | Yes              | O43866              | CD5 antigen-like                                         | CD5L         | 377,830.00      | 69,239.00         | 55,821.00         | 96,818.00         | 44,043.00         | 63,341.00         | 48,571.00         | 7        |
|                   |                  | O14979-3            | Heterogeneous nuclear ribonucleoprotein D-like           | HNRNPDL      | 365,710.00      | 19,376.00         | 5,685.60          | 198,730.00        | 94,806.00         | 32,417.00         | 81,696.00         | 8        |
|                   | Yes              | Q8UNZ2              | NSFL1 cofactor p47                                       | NSFL1C       | 347,920.00      | 35,893.00         | 47,043.00         | 106,430.00        | 50,500.00         | 26,935.00         | 14,121.00         | 8        |
|                   | Yes              | P01767              | Ig heavy chain V-III region BUT                          | IGHV3OR9     | 341,360.00      | 0                 | 62,905.00         | 0                 | 45,120.00         | 39,526.00         | 0                 | 3        |
|                   | Yes              | P06702              | Protein S100-A9                                          | S100A9       | 328,250.00      | 18,939.00         | 0                 | 0                 | 0                 | 309,310.00        | 0                 | 5        |
|                   |                  | ETE0B2              | Lactotransferin:Lactoferrin-H                            | LTFF         | 327,250.00      | 38,827.00         | 139,660.00        | 27,766.00         | 5,594.10          | 60,142.00         | 55,260.00         | 7        |
|                   | Yes              | J3QSA3              | Ubiquitin-40S ribosomal protein S27a                     | UBB          | 324,440.00      | 21,637.00         | 77,494.00         | 57,113.00         | 32,248.00         | 60,277.00         | 75,668.00         | 2        |
|                   | Yes              | P35579              | Myosin-9                                                 | MYH9         | 312,240.00      | 3,676.70          | 19,015.00         | 0                 | 0                 | 289,550.00        | 0                 | 14       |
|                   | Yes              | P00488              | Coagulation factor XIII A chain                          | F13A1        | 309,550.00      | 38,304.00         | 144,670.00        | 49,351.00         | 0                 | 12,444.00         | 64,783.00         | 11       |
|                   | Yes              | P16403              | Histone H1.2                                             | HIST1H1C     | 308,980.00      | 26,941.00         | 14,080.00         | 6,953.30          | 0                 | 29,397.00         | 231,610.00        | 8        |
|                   | Yes              | P05091              | Aldheyde dehydrogenase, mitochondrial                    | ALDH2        | 295,420.00      | 0                 | 295,420.00        | 0                 | 0                 | 0                 | 0                 | 13       |
|                   |                  |                     |                                                          |              |                 |                   |                   |                   |                   |                   |                   |          |

|     |             |                                                                          |           |             |            |             |            |            |            |            |    |
|-----|-------------|--------------------------------------------------------------------------|-----------|-------------|------------|-------------|------------|------------|------------|------------|----|
|     | P11166      | Solute carrier family 2, facilitated glucose transporter member 1        | SLC2A1    | 117,840,000 | 27,594,000 | 20,800,000  | 27,638,000 | 17,045,000 | 17,769,000 | 6,991,000  | 1  |
| Yes | AA0A0A0MS10 | Peroxiorexin-1                                                           | PRDX1     | 117,410,000 | 0          | 23,434,000  | 24,158,000 | 0          | 50,913,000 | 18,908,000 | 6  |
|     | P04843      | Dolichyl-diphosphooligosaccharide-protein glycosyltransferase subunit 1  | RPN1      | 114,750,000 | 14,069,000 | 19,291,000  | 38,305,000 | 0          | 5,918,100  | 37,166,000 | 5  |
|     | Q9BS26      | Endoplasmic reticulum resident protein 44                                | ERP44     | 114,410,000 | 0          | 19,792,000  | 0          | 57,777,000 | 15,611,000 | 21,226,000 | 2  |
| Yes | P31040      | Succinate dehydrogenase [ubiquinone] flavoprotein subunit, mitochondrial | SDHA      | 110,870,000 | 21,023,000 | 29,762,000  | 5,004,900  | 6,511,700  | 7,760,200  | 40,805,000 | 5  |
| Yes | ESP523      | Coflin-1                                                                 | COFL1     | 107,680,000 | 0          | 47,412,000  | 6,922,800  | 6,769,200  | 42,374,000 | 2,206,000  | 2  |
| Yes | P00918      | Carbonic anhydrase 2                                                     | CA2       | 103,530,000 | 0          | 103,530,000 | 0          | 0          | 0          | 0          | 6  |
| Yes | P40926      | Malate dehydrogenase, mitochondrial;Malate dehydrogenase                 | MHD2      | 102,110,000 | 0          | 102,110,000 | 0          | 0          | 0          | 0          | 6  |
| Yes | P09210      | Glutathione S-transferase A2                                             | GSTA2     | 101,640,000 | 0          | 101,640,000 | 0          | 0          | 0          | 0          | 6  |
| Yes | P09211      | Glutathione S-transferase P                                              | GSTP1     | 101,360,000 | 0          | 24,528,000  | 0          | 0          | 76,833,000 | 0          | 2  |
| Yes | P00338-3    | L-lactate dehydrogenase A chain                                          | LDHA      | 101,020,000 | 0          | 67,486,000  | 0          | 0          | 33,536,000 | 0          | 4  |
| Yes | P30084      | Enoyl-CoA hydratase, mitochondrial                                       | ECHS1     | 100,510,000 | 0          | 100,510,000 | 0          | 0          | 0          | 0          | 5  |
| Yes | P00326      | Alcohol dehydrogenase 1C                                                 | ADH1C     | 99,362,000  | 0          | 99,362,000  | 0          | 0          | 0          | 0          | 12 |
| Yes | P11182      | Lipamide acyltransferase component of branched-chain $\alpha$ -keto acid | DBT       | 98,020,000  | 2,429,500  | 0           | 88,425,000 | 7,165,200  | 0          | 0          | 6  |
| Yes | P60174      | Triosephosphate isomerase                                                | TPH1      | 96,410,000  | 0          | 96,410,000  | 0          | 0          | 0          | 0          | 6  |
| Yes | P31995-4    | Low affinity immunoglobulin gamma Fc region receptor 1b-c                | FCGR2C    | 95,150,000  | 0          | 0           | 21,613,000 | 16,029,000 | 0          | 57,508,000 | 2  |
| Yes | P81605-2    | Dermicidin;Survival-promoting peptide;DCC-1                              | DCD       | 94,948,000  | 0          | 17,310,000  | 24,755,000 | 14,705,000 | 27,485,000 | 10,693,000 | 8  |
| Yes | AA071ZV2R3  | Heterogeneous nuclear ribonucleoprotein A3                               | HNRNPA3   | 94,476,000  | 0          | 0           | 40,480,000 | 18,442,000 | 11,950,000 | 23,604,000 | 5  |
| Yes | Q15828      | Cystatin-M                                                               | CST6      | 90,006,000  | 23,842,000 | 0           | 12,469,000 | 11,616,000 | 14,124,000 | 27,955,000 | 1  |
| Yes | P04259      | Keratin, type II cytoskeletal 6B                                         | KRT6B     | 89,853,000  | 0          | 3,936,600   | 12,262,000 | 4,134,500  | 69,520,000 | 0          | 56 |
| Yes | K7E002      | DAZ-associated protein 1                                                 | DAZAP1    | 88,043,000  | 0          | 4,283,400   | 36,199,000 | 21,232,000 | 26,328,000 | 0          | 2  |
| Yes | P08238      | Heat shock protein HSP 90-beta                                           | HSPA90B1  | 87,486,000  | 9,004,500  | 43,177,000  | 0          | 0          | 26,031,000 | 9,274,000  | 8  |
| Yes | Q13835-2    | Plakophilin-1                                                            | PKP1      | 87,271,000  | 14,367,000 | 0           | 4,843,200  | 0          | 14,614,000 | 47,376,000 | 3  |
| Yes | P16401      | Histone H1.5                                                             | HIST1H1B  | 86,334,000  | 0          | 0           | 0          | 0          | 33,838,000 | 52,496,000 | 5  |
| Yes | P21549      | Serine-pyruvate aminotransferase                                         | AGXT      | 84,253,000  | 0          | 84,253,000  | 0          | 0          | 0          | 0          | 3  |
| Yes | E7EQR4      | Ezrin                                                                    | EZR       | 83,177,000  | 11,616,000 | 0           | 57,174,000 | 0          | 0          | 14,386,000 | 6  |
| Yes | A8MW49      | Fatty acid-binding protein, liver                                        | FABP1     | 80,281,000  | 0          | 80,281,000  | 0          | 0          | 0          | 0          | 3  |
| Yes | Q09666      | Neuroblast differentiation-associated protein AHNAK                      | AHNAK     | 79,609,000  | 4,552,900  | 0           | 0          | 0          | 75,056,000 | 0          | 8  |
| Yes | P06396-2    | Gelsolin                                                                 | GSN       | 77,391,000  | 0          | 0           | 0          | 0          | 77,391,000 | 0          | 5  |
| Yes | P08311      | Cathepsin G                                                              | CTSG      | 75,345,000  | 0          | 64,752,000  | 0          | 0          | 10,593,000 | 0          | 3  |
| Yes | P07377      | Profilin-1                                                               | PFN1      | 73,460,000  | 0          | 0           | 0          | 0          | 45,606,000 | 0          | 2  |
| Yes | Q13967      | Bleomycin hydrolase                                                      | BLMH      | 71,299,000  | 15,720,000 | 8,186,000   | 22,679,000 | 0          | 9,475,800  | 15,237,000 | 2  |
| Yes | AA0AG2JW1   | Heat shock 70 kDa protein 1A;Heat shock 70 kDa protein 1B                | HSPA1A    | 70,838,000  | 0          | 40,124,000  | 9,828,700  | 0          | 14,307,000 | 6,577,000  | 7  |
| Yes | P25311      | Zinc-alpha-2-glycoprotein                                                | AZGP1     | 70,437,000  | 17,679,000 | 10,057,000  | 36,466,000 | 0          | 0          | 6,235,100  | 6  |
| Yes | AA071ZYQK6  | 60 kDa heat shock protein, mitochondrial                                 | HSPD1     | 70,230,000  | 0          | 41,023,000  | 0          | 0          | 29,206,000 | 0          | 3  |
| Yes | P30041      | Peroxiorexin-6                                                           | PRDX6     | 70,214,000  | 0          | 70,214,000  | 0          | 0          | 0          | 0          | 2  |
| Yes | P17066      | Heat shock 70 kDa protein 6;Putative heat shock 70 kDa protein 7         | HSPA6     | 69,823,000  | 0          | 31,296,000  | 5,901,700  | 4,534,000  | 18,897,000 | 9,194,300  | 4  |
| Yes | EPHF19      | Annexin;Annexin A5                                                       | ANXA5     | 69,705,000  | 7,186,600  | 4,930,200   | 11,971,000 | 16,361,000 | 5,489,900  | 23,786,000 | 4  |
| Yes | P31025      | Lipocalin;Putative lipocalin 1-like protein 1                            | LCN1      | 68,570,000  | 17,246,000 | 0           | 63,356,000 | 0          | 19,543,000 | 9,896,400  | 2  |
| Yes | P31930      | Cytochrome b-c1 complex subunit 1, mitochondrial                         | UQCRC1    | 66,759,000  | 0          | 7,055,500   | 32,142,000 | 9,727,500  | 17,834,000 | 0          | 2  |
| Yes | P22735      | Protein-glutamine gamma-glutamyltransferase K                            | TGM1      | 66,068,000  | 9,145,000  | 8,097,100   | 11,141,000 | 12,123,000 | 8,823,300  | 16,739,000 | 2  |
| Yes | Q6ZVX7      | F-box only protein 50                                                    | NCCR1     | 65,548,000  | 18,299,000 | 1,627,800   | 13,871,000 | 10,069,000 | 9,179,600  | 12,502,000 | 2  |
| Yes | Q92637      | High affinity immunoglobulin gamma Fc receptor 1B                        | FCGR1B    | 65,085,000  | 14,808,000 | 24,911,000  | 0          | 0          | 0          | 25,367,000 | 2  |
| Yes | P31947-2    | 14-3-3 protein sigma                                                     | SFN       | 65,014,000  | 0          | 0           | 0          | 0          | 65,014,000 | 0          | 4  |
| Yes | MOR3F1      | Heterogeneous nuclear ribonucleoprotein U-like protein 1                 | HNRNPL1   | 64,921,000  | 7,997,300  | 41,310,000  | 15,614,000 | 0          | 0          | 0          | 3  |
| Yes | Q9HAUJ-6    | Pleckstrin homology domain-6                                             | PLEKH6    | 64,712,000  | 0          | 0           | 0          | 35,710,000 | 13,996,000 | 15,006,000 | 1  |
| Yes | P16822      | Phosphoenolpyruvate carboxykinase [GTP], mitochondrial                   | PFKP2     | 63,356,000  | 0          | 0           | 0          | 0          | 0          | 0          | 3  |
| Yes | P42765      | 3-ketoacyl-CoA thiolase, mitochondrial                                   | ACAA2     | 63,130,000  | 0          | 63,130,000  | 0          | 0          | 0          | 0          | 3  |
| Yes | V5GYC1      | Apolipoprotein A-II;Proapolipoprotein A-II;Truncated apolipoprotein A-II | APOA2     | 63,025,000  | 0          | 0           | 0          | 0          | 63,025,000 | 0          | 3  |
| Yes | Q95954      | Formimidyltransferase-cyclodeaminase                                     | FTCD      | 62,955,000  | 0          | 62,955,000  | 0          | 0          | 0          | 0          | 3  |
| Yes | P01833      | Polymeric immunoglobulin receptor;Secretory component                    | PIGR      | 62,780,000  | 55,565,000 | 0           | 7,215,700  | 0          | 0          | 0          | 2  |
| Yes | H3BUH7      | Fructose-bisphosphate aldolase;Fructose-bisphosphate aldolase A          | ALDOA     | 61,547,000  | 0          | 30,590,000  | 0          | 0          | 30,957,000 | 0          | 2  |
| Yes | I3N103      | Protein disulfide-isomerase                                              | P4HB      | 61,057,000  | 5,594,500  | 24,393,000  | 6,481,000  | 4,107,900  | 14,479,000 | 6,001,800  | 1  |
| Yes | P04899-4    | Guanine nucleotide-binding protein (G <i>i</i> ) subunit alpha-2         | GNAI2     | 60,628,000  | 0          | 5,045,200   | 17,245,000 | 6,652,900  | 12,318,000 | 19,367,000 | 3  |
| Yes | J3Q336      | L-xylulose reductase                                                     | DXCR      | 58,887,000  | 0          | 58,887,000  | 0          | 0          | 0          | 0          | 4  |
| Yes | D6RE44      | Casein kinase I isoform alpha;Casein kinase I isoform alpha-like         | CNK1A1    | 58,574,000  | 0          | 58,574,000  | 0          | 0          | 0          | 0          | 1  |
| Yes | P01594      | Ig kappa chain V-I region AU;Ig kappa chain V-I region AG                | IGKV1D-33 | 58,512,000  | 35,985,000 | 4,295,800   | 2,809,900  | 3,517,000  | 4,290,800  | 7,612,700  | 1  |
| Yes | AA0A0MSV6   | Complement C1q subcomponent subunit B                                    | C1QB      | 58,010,000  | 0          | 0           | 58,010,000 | 0          | 0          | 0          | 2  |
| Yes | P69891      | Hemoglobin subunit gamma-1                                               | HGB1      | 57,351,000  | 0          | 0           | 20,525,000 | 11,885,000 | 0          | 24,940,000 | 11 |
| Yes | Q5T6W2      | Heterogeneous nuclear ribonucleoprotein K                                | HNRNPK    | 56,797,000  | 0          | 9,694,800   | 10,343,000 | 0          | 20,754,000 | 16,006,000 | 1  |
| Yes | Q6P0N6      | Dystonin                                                                 | DST       | 55,054,000  | 0          | 0           | 0          | 55,054,000 | 0          | 0          | 1  |
| Yes | P08559-3    | Pyruvate dehydrogenase E1 component subunit alpha, mitochondrial         | PDHA1     | 54,649,000  | 0          | 0           | 36,915,000 | 0          | 17,733,000 | 0          | 2  |
| Yes | P54868      | Hydroxymethylglutaryl-CoA synthase, mitochondrial                        | HMGCS2    | 54,294,000  | 0          | 54,294,000  | 0          | 0          | 0          | 0          | 3  |
| Yes | K7EP41      | Glucose-6-phosphatase isomerase                                          | GPI       | 51,787,000  | 0          | 0           | 0          | 0          | 23,693,000 | 0          | 1  |
| Yes | AA071ZV5R8  | Dipeptidyl peptidase 4 soluble form                                      | DP4       | 49,250,000  | 16,947,000 | 0           | 0          | 6,971,900  | 0          | 25,332,000 | 3  |
| Yes | P02745      | Complement C1q subcomponent subunit A                                    | C1QA      | 49,029,000  | 0          | 0           | 26,241,000 | 7,260,800  | 0          | 15,527,000 | 1  |
| Yes | H7C131      | 3-ketoacyl-CoA thiolase, peroxisomal                                     | ACAA1     | 49,012,000  | 0          | 39,040,000  | 0          | 0          | 9,971,800  | 0          | 2  |
| Yes | P14550      | Alcohol dehydrogenase [NADP(+)]                                          | AKR1A1    | 48,970,000  | 0          | 48,970,000  | 0          | 0          | 0          | 0          | 3  |
| Yes | H7BYH4      | Superoxide dismutase [Cu-Zn]                                             | SOD1      | 48,641,000  | 0          | 36,536,000  | 0          | 0          | 12,105,000 | 0          | 1  |
| Yes | O75891-2    | Cytosolic 10-formyltetrahydrofolate dehydrogenase                        | ALDH1L2   | 47,334,000  | 0          | 47,334,000  | 0          | 0          | 0          | 0          | 4  |
| Yes | P16152      | Carbonyl reductase [NADPH] 1                                             | CBR1      | 46,537,000  | 0          | 46,537,000  | 0          | 0          | 0          | 0          | 3  |
| Yes | Q16762      | Thiosulfate sulfurtransferase                                            | TSST      | 46,314,000  | 0          | 46,314,000  | 0          | 0          | 0          | 0          | 3  |
| Yes | P98082-2    | Disabled homolog 2                                                       | DAB2      | 46,020,000  | 7,661,800  | 4,233,100   | 4,780,500  | 11,910,000 | 4,537,100  | 12,898,000 | 1  |
| Yes | AA02R8Y74   | Peroxisomal multifunctional enzyme type 2;Enoyl-CoA hydratase 2          | HSD17B4   | 44,462,000  | 0          | 44,462,000  | 0          | 0          | 0          | 0          | 3  |
| Yes | F5HSP2      | 2-oxoisovalerate dehydrogenase subunit alpha, mitochondrial              | BCKDHA    | 44,336,000  | 0          | 0           | 27,748,000 | 6,992,100  | 9,596,700  | 0          | 2  |
| Yes | P07910      | Heterogeneous nuclear ribonucleoproteins C1/C2                           | HNRNRC1   | 44,199,000  | 0          | 0           | 19,282,000 | 0          | 24,917,000 | 0          | 2  |
| Yes | P01701      | Ig lambda chain V-I region NEW                                           | IGLV1-51  | 43,260,000  | 43,260,000 | 0           | 0          | 0          | 0          | 0          | 1  |
| Yes | Q16610-2    | Extracellular matrix protein 1                                           | ECM1      | 43,164,000  | 16,073,000 | 0           | 4,679,200  | 16,017,000 | 0          | 6,394,400  | 3  |
| Yes | P08748      | Ig lambda chain V-III region LOI                                         | IGLV3-9   | 39,938,000  | 39,938,000 | 0           | 0          | 0          | 0          | 0          | 2  |
| Yes | P00480      | Oritinase carbamoyltransferase, mitochondrial                            | OTC       | 38,911,000  | 0          | 38,911,000  | 0          | 0          | 0          | 0          | 3  |
| Yes | P06727      | Apolipoprotein A-IV                                                      | APOA4     | 38,730,000  | 0          | 0           | 0          | 0          | 38,730,000 | 0          | 4  |
| Yes | AA0A3BS1A6  | Complement C4-A;Complement C4 beta chain                                 | C4B       | 37,477,000  | 0          | 0           | 0          | 0          | 37,477,000 | 0          | 3  |
| Yes | C9J210      | Arf-GAP domain and FG repeat-containing protein 1                        | AGFG1     | 37,463,000  | 0          | 19,993,000  | 0          | 17,470,000 | 0          | 0          | 1  |
| Yes | P62081      | 40S ribosomal protein S7                                                 | RPS7      | 36,563,000  | 0          | 0           | 0          | 0          | 36,563,000 | 0          | 1  |
| Yes | P00505      | Aspartate aminotransferase, mitochondrial                                | GOT2      | 36,173,000  | 0          | 36,173,000  | 0          | 0          | 0          | 0          | 1  |
| Yes | Q14669      | E3 ubiquitin-protein ligase TRIP12                                       | TRIP12    | 35,387,000  | 5,063,600  | 0           | 0          | 1,274,500  | 7,478,400  | 21,571,000 | 2  |
| Yes | P00747      | Plasminogen;Plasmin heavy chain A;Activation peptide;Angiostatin         | PLG       | 35,204,000  | 0          | 18,546,000  | 0          | 0          | 16,658,000 | 0          | 2  |
| Yes | AA0A5FZHD4  | Acetyl-CoA acetyltransfer                                                |           |             |            |             |            |            |            |            |    |

|     |            |                                                                            |               |            |            |            |            |           |            |            |
|-----|------------|----------------------------------------------------------------------------|---------------|------------|------------|------------|------------|-----------|------------|------------|
| Yes | P25325-2   | 3-mercaptopyruvate sulfurtransferase;Sulfurtransferase                     | MPST          | 19,789,000 | 0          | 19,789,000 | 0          | 0         | 0          | 2          |
| Yes | AOA3B3ISY1 | Tissue factor pathway inhibitor 2                                          | TFPI2         | 19,686,000 | 8,176,900  | 0          | 0          | 8,803,000 | 2,706,500  | 0          |
| Yes | Q16698-2   | 2,4-dienoyl-CoA reductase, mitochondrial                                   | DECR1         | 19,661,000 | 0          | 19,661,000 | 0          | 0         | 0          | 2          |
| Yes | C9J3V37    | Prothrombin;Activation peptide fragment 1                                  | F2            | 19,349,000 | 0          | 0          | 0          | 0         | 19,349,000 | 0          |
| Yes | AOA038PFC6 | Glycine amidinotransferase, mitochondrial                                  | GATM          | 18,900,000 | 0          | 18,900,000 | 0          | 0         | 0          | 1          |
| Yes | AOA07596H9 | Immunoglobulin lambda variable 4-59                                        | IGLV4-59      | 18,184,000 | 0          | 0          | 0          | 0         | 0          | 1          |
| Yes | V9GYG0     | ADP/ATP translocase 3;ADP/ATP translocase 3, N-terminally processed        | SLC25A4       | 17,956,000 | 0          | 0          | 6,886,600  | 4,931,600 | 0          | 6,137,900  |
| Yes | AOA1W2PP35 | Heterogeneous nuclear ribonucleoprotein U                                  | HNRNPU        | 17,783,000 | 0          | 0          | 17,783,000 | 0         | 0          | 0          |
| Yes | ESRGW4     | Nucleophosmin                                                              | NPM1          | 17,763,000 | 0          | 0          | 0          | 0         | 17,763,000 | 0          |
| Yes | J3QRN2     | Beta-2-glycoprotein 1                                                      | APOH          | 17,755,000 | 0          | 8,891,500  | 0          | 0         | 0          | 8,863,300  |
| Yes | E9PRN7     | 3 beta-hydroxysteroid dehydrogenase/Delta 5->4-isomerase type 2            | HSD3B1        | 17,661,000 | 0          | 0          | 4,061,200  | 6,881,400 | 0          | 6,718,400  |
| Yes | P52758     | Ribonuclease UK114                                                         | HRSPI2        | 16,603,000 | 0          | 16,603,000 | 0          | 0         | 0          | 0          |
| Yes | Q15084-3   | Protein disulfide-isomerase A6                                             | PDI6A6        | 16,371,000 | 0          | 10,683,000 | 0          | 0         | 5,687,900  | 0          |
| Yes | Q5TTF55    | Delta-1-pyruvate-5-carboxylate dehydrogenase, mitochondrial                | ALPDL2        | 16,343,000 | 0          | 0          | 0          | 0         | 0          | 0          |
| Yes | HOY4K8     | Fibronectin;Anastellin;Ugli-Y1;Ugli-Y2;Ugli-Y3                             | FN1           | 16,129,000 | 2,290,000  | 0          | 7,354,100  | 0         | 0          | 6,485,400  |
| Yes | AOA494C1T2 | C-1-tetrahydrofolate synthase, cytoplasmic                                 | MTHFD1        | 15,674,000 | 0          | 15,674,000 | 0          | 0         | 0          | 0          |
| Yes | E7EPM6     | Long-chain-fatty-acid-CoA ligase 1                                         | ACSL1         | 15,503,000 | 0          | 15,503,000 | 0          | 0         | 0          | 0          |
| Yes | HOYJF9     | Dihydropyridyllysine-residue succinyltransferase/2-oxoglutarate dehydrogen | DLST          | 14,869,000 | 0          | 0          | 11,035,000 | 0         | 3,833,400  | 0          |
| Yes | Q14134-2   | Tripartite motif-containing protein 29                                     | TRIM29        | 14,797,000 | 0          | 0          | 0          | 0         | 14,797,000 | 0          |
| Yes | P18206-2   | Vinculin                                                                   | VCL           | 14,766,000 | 0          | 0          | 0          | 0         | 0          | 14,766,000 |
| Yes | D6R9F3     | Heterogeneous nuclear ribonucleoprotein A/B                                | HNRNPA1       | 14,544,000 | 0          | 0          | 14,544,000 | 0         | 0          | 0          |
| Yes | P10696     | Alkaline phosphatase, placental-like;Alkaline phosphatase, placental type  | ALPL2         | 14,464,000 | 14,464,000 | 0          | 0          | 0         | 0          | 0          |
| Yes | HSBRG4     | Cytochrome b-c1 complex subunit 2, mitochondrial                           | UQCRC2        | 14,346,000 | 0          | 14,346,000 | 0          | 0         | 0          | 0          |
| Yes | C9JRL4     | Malate dehydrogenase;Malate dehydrogenase, cytoplasmic                     | MDH1          | 14,124,000 | 0          | 14,124,000 | 0          | 0         | 0          | 0          |
| Yes | P62258     | 14-3-3 protein epsilon                                                     | YWHAE         | 14,037,000 | 0          | 5,850,000  | 0          | 0         | 0          | 8,187,500  |
| Yes | D6RFG5     | Annexin;Annexin A3                                                         | ANXA3         | 13,723,000 | 0          | 0          | 0          | 0         | 13,723,000 | 0          |
| Yes | O60701-3   | UDP-glucose 6-dehydrogenase                                                | UGDH          | 13,415,000 | 0          | 13,415,000 | 0          | 0         | 0          | 0          |
| Yes | B0YIW2     | Apolipoprotein C-III                                                       | APOC3         | 13,244,000 | 0          | 0          | 0          | 0         | 13,244,000 | 0          |
| Yes | AOA0G2JQH2 | 40S ribosomal protein S18                                                  | RPS18         | 13,172,000 | 0          | 0          | 0          | 0         | 13,172,000 | 0          |
| Yes | P49189     | 4-Trimethylaminobutyraldehyde dehydrogenase                                | ALDH9A1       | 13,161,000 | 0          | 13,161,000 | 0          | 0         | 0          | 0          |
| Yes | P11277-3   | Spectrin beta chain, erythrocytic                                          | SPTB          | 13,077,000 | 0          | 13,077,000 | 0          | 0         | 0          | 0          |
| Yes | Q9HC84     | Mucin-5B                                                                   | MUC5B         | 12,990,000 | 0          | 12,990,000 | 0          | 0         | 0          | 0          |
| Yes | P46783     | 40S ribosomal protein S10;Putative 40S ribosomal protein S10-like          | RPS10         | 12,790,000 | 0          | 6,330,400  | 0          | 0         | 6,459,400  | 0          |
| Yes | P04080     | Cystatin-B                                                                 | CSTB          | 12,717,000 | 7,164,000  | 0          | 5,552,700  | 0         | 0          | 0          |
| Yes | F6RFD5     | Destrin                                                                    | DSTN          | 12,619,000 | 0          | 12,619,000 | 0          | 0         | 0          | 0          |
| Yes | P25786     | Proteasome subunit alpha type-1;Proteasome subunit alpha type              | PSMA1         | 12,242,000 | 0          | 8,949,000  | 3,292,900  | 0         | 0          | 0          |
| Yes | P16157-14  | Ankyrin-1                                                                  | ANK1          | 12,173,000 | 0          | 12,173,000 | 0          | 0         | 0          | 0          |
| Yes | AOA087WT59 | Transferrin                                                                | TTR           | 11,910,000 | 0          | 0          | 0          | 0         | 11,910,000 | 0          |
| Yes | E9PK47     | Alpha-1,4 glucan phosphorylase;Glycogen phosphorylase, liver form          | PGYL          | 11,862,000 | 0          | 11,862,000 | 0          | 0         | 0          | 0          |
| Yes | P02808     | Statherin                                                                  | STATH         | 11,823,000 | 11,823,000 | 0          | 0          | 0         | 0          | 0          |
| Yes | P08246     | Neutrophil elastase                                                        | ELANE         | 11,630,000 | 0          | 11,630,000 | 0          | 0         | 0          | 0          |
| Yes | P52907     | F-actin-capping protein subunit alpha-1                                    | CAPZA1        | 11,591,000 | 0          | 0          | 0          | 0         | 11,591,000 | 0          |
| Yes | C9JA05     | Immunoglobulin J chain                                                     | JCHAIN        | 11,558,000 | 0          | 0          | 0          | 0         | 11,558,000 | 0          |
| Yes | Q9UG54     | Mitogen-activated protein kinase kinase kinase 7                           | DKFZp586F0420 | 11,510,000 | 11,510,000 | 0          | 0          | 0         | 0          | 0          |
| Yes | P45954-2   | Short/branched chain specific acyl-CoA dehydrogenase, mitochondrial        | ACADSB        | 11,392,000 | 0          | 11,392,000 | 0          | 0         | 0          | 0          |
| Yes | B5MD38     | Trifunctional enzyme subunit beta, mitochondrial;3-ketoacyl-CoA thiolase   | HADHB         | 11,328,000 | 0          | 11,328,000 | 0          | 0         | 0          | 0          |
| Yes | P25815     | Protein S100-P                                                             | S100P         | 11,215,000 | 0          | 0          | 0          | 0         | 0          | 11,215,000 |
| Yes | P02549-2   | Spectrin alpha chain, erythrocytic 1                                       | SPTA1         | 10,654,000 | 0          | 10,654,000 | 0          | 0         | 0          | 0          |
| Yes | HOYAG8     | Alcohol dehydrogenase class-3                                              | AHD5          | 10,551,000 | 0          | 10,551,000 | 0          | 0         | 0          | 0          |
| Yes | AOA087WW87 | Ig kappa chain V-II region FR;Ig kappa chain V-II region Cum               | IGKV2-40      | 10,538,000 | 0          | 0          | 0          | 0         | 10,538,000 | 0          |
| Yes | B1AKI5     | Muscleblind-like protein 3;Muscleblind-like protein 2                      | MBNL3         | 10,394,000 | 0          | 10,394,000 | 0          | 0         | 0          | 0          |
| Yes | B1AKQ8     | Guanine nucleotide-binding protein G(I)(G(S))/G(T) subunit beta-1          | GNB1          | 10,354,000 | 0          | 0          | 0          | 0         | 0          | 10,354,000 |
| Yes | AOA0J9YXZ5 | Ras GTPase-activating-like protein IQGAP1                                  | IQGAP1        | 10,328,000 | 0          | 0          | 0          | 0         | 10,328,000 | 0          |
| Yes | P13716-2   | Delta-aminolevulinic acid dehydratase                                      | ALAD          | 10,259,000 | 0          | 10,259,000 | 0          | 0         | 0          | 0          |
| Yes | Q13404-8   | Ubiquitin-conjugating enzyme E2 variant 1                                  | UBE2V1        | 9,964,900  | 0          | 9,964,900  | 0          | 0         | 0          | 0          |
| Yes | M0R0Y6     | Heterogeneous nuclear ribonucleoprotein M                                  | HNRNPM        | 9,627,300  | 0          | 0          | 0          | 0         | 9,627,300  | 0          |
| Yes | AOA7I2V699 | Nucleolin                                                                  | NCL           | 9,473,600  | 0          | 0          | 0          | 0         | 9,473,600  | 0          |
| Yes | P05387     | 60S acidic ribosomal protein P2                                            | RPLP2         | 9,359,400  | 3,670,500  | 0          | 0          | 0         | 5,688,900  | 0          |
| Yes | Q06520     | Bile salt sulfotransferase                                                 | SULT2A1       | 9,347,800  | 0          | 9,347,800  | 0          | 0         | 0          | 0          |
| Yes | P21399     | Cytoplasmic asconitase hydratase                                           | ACO1          | 9,273,300  | 0          | 9,273,300  | 0          | 0         | 0          | 0          |
| Yes | P27824-3   | Calnexin                                                                   | CANX          | 9,232,100  | 0          | 0          | 0          | 0         | 9,232,100  | 0          |
| Yes | AOA0C4DGA2 | Enoyl-CoA delta isomerase 2, mitochondrial                                 | ECI2          | 9,217,600  | 0          | 9,217,600  | 0          | 0         | 0          | 0          |
| Yes | ADA140TA58 | Keratin-associated protein 9-9                                             | KRTAP9-9      | 9,046,100  | 0          | 9,046,100  | 0          | 0         | 0          | 0          |
| Yes | J3KRQ2     | Gasdermin-A                                                                | GSMDA         | 8,582,300  | 0          | 3,803,000  | 0          | 0         | 0          | 4,779,300  |
| Yes | F5GZP6     | Liprin-beta-1                                                              | PPP1B1        | 8,376,800  | 0          | 0          | 0          | 0         | 0          | 0          |
| Yes | P32926     | Desmoglein-3                                                               | DSG3          | 8,254,400  | 0          | 0          | 0          | 0         | 8,254,400  | 0          |
| Yes | AOA0G2JMB2 | Ig alpha-2 chain C region                                                  | IGHA2         | 7,976,600  | 0          | 7,976,600  | 0          | 0         | 0          | 0          |
| Yes | MOQY85     | Tubulin beta-4A chain;Tubulin beta-4B chain                                | TUBB4A        | 7,933,700  | 0          | 7,933,700  | 0          | 0         | 0          | 0          |
| Yes | Q14117     | Dihydropyrimidinase                                                        | DPYS          | 7,893,100  | 0          | 7,893,100  | 0          | 0         | 0          | 0          |
| Yes | E9PE82     | Short-chain specific acyl-CoA dehydrogenase, mitochondrial                 | ACADS         | 7,313,700  | 0          | 7,313,700  | 0          | 0         | 0          | 0          |
| Yes | F22ZW8     | Selenium-binding protein 1                                                 | SELENBP1      | 6,229,500  | 0          | 6,229,500  | 0          | 0         | 0          | 0          |
| Yes | Q13011     | Delta(3,5)-Delta(2,4)-dienoyl-CoA isomerase, mitochondrial                 | ECH1          | 5,760,800  | 0          | 5,760,800  | 0          | 0         | 0          | 0          |
| Yes | Q0UBG3     | Cornulin                                                                   | CRNN          | 5,651,400  | 0          | 0          | 5,651,400  | 0         | 0          | 0          |
| Yes | Q08257-2   | Quinone oxidoreductase                                                     | CRY2          | 5,461,300  | 0          | 5,461,300  | 0          | 0         | 0          | 0          |
| Yes | P28838-2   | Cytosol aminopeptidase                                                     | LAP3          | 5,135,200  | 0          | 5,135,200  | 0          | 0         | 0          | 0          |
| Yes | A8MUD9     | 60S ribosomal protein L7                                                   | RPL7          | 4,984,000  | 4,984,000  | 0          | 0          | 0         | 0          | 0          |
| Yes | E9PEB5     | Far upstream element-binding protein 1                                     | FUBP1         | 4,190,600  | 0          | 0          | 4,190,600  | 0         | 0          | 0          |
| Yes | P09651     | Heterogeneous nuclear ribonucleoprotein A1                                 | HNRNPA1       | 3,752,800  | 3,752,800  | 0          | 0          | 0         | 0          | 0          |
| Yes | P22314-2   | Ubiquitin-like modifier-activating enzyme 1                                | UBA1          | 3,748,100  | 0          | 3,748,100  | 0          | 0         | 0          | 0          |
| Yes | Q14032     | Bile acid-CoA:amino acid N-acyltransferase                                 | BAAT          | 3,451,500  | 0          | 3,451,500  | 0          | 0         | 0          | 0          |
| Yes | G3VSK1     | Protein transport protein Sec23A                                           | SEC23A        | 2,912,600  | 0          | 0          | 0          | 0         | 2,912,600  | 0          |
| Yes | H7C4C8     | T-complex protein 1 subunit theta                                          | CCT8          | 2,848,600  | 0          | 2,848,600  | 0          | 0         | 0          | 0          |
| Yes | E9PBS1     | Multifunctional protein ADE2;Phosphoribosylaminimidazole carboxylase       | PACS          | 2,615,600  | 0          | 2,615,600  | 0          | 0         | 0          | 0          |



**Table 4**  
**Proteins identified in PICALM immunoprecipitations.**  
 Placental extracts U1, R4, Q1, Q4, O1, and N3 were immunoprecipitated in one experiment.

| Majority protein ID | Protein                                               | Gene      | Total Intensity | Intensity PICALM U1 | Intensity PICALM R4 | Intensity PICALM Q1 | Intensity PICALM Q4 | Intensity PICALM O1 | Intensity PICALM N3 | Peptides |
|---------------------|-------------------------------------------------------|-----------|-----------------|---------------------|---------------------|---------------------|---------------------|---------------------|---------------------|----------|
| P01857              | Ig gamma-1 chain C region                             | IGHG1     | 48,398,000,000  | 197,890,000         | 13,091,000,000      | 789,180,000         | 14,626,000,000      | 12,977,000,000      | 6,715,700,000       | 23       |
| Q13492              | Phosphatidylinositol-binding clathrin assembly prote  | PICALM    | 18,858,000,000  | 901,110,000         | 5,271,000,000       | 657,650,000         | 3,743,800,000       | 4,066,800,000       | 4,217,400,000       | 35       |
| P50995-2            | Annexin A11                                           | ANXA11    | 15,851,000,000  | 139,870,000         | 4,529,400,000       | 433,220,000         | 3,795,300,000       | 3,270,300,000       | 3,682,800,000       | 37       |
| P20073-2            | Annexin A7                                            | ANXA7     | 9,130,600,000   | 666,020,000         | 2,765,200,000       | 238,940,000         | 1,535,100,000       | 2,049,900,000       | 1,875,500,000       | 32       |
| AOA286YES1          | Ig gamma-3 chain C region                             | IGHG3     | 4,336,300,000   | 33,112,000          | 1,106,600,000       | 53,173,000          | 927,810,000         | 812,970,000         | 1,402,600,000       | 20       |
| AOA712V378          | Laminin subunit beta-1                                | LAMB1     | 3,056,100,000   | 0                   | 3,056,100,000       | 0                   | 0                   | 0                   | 0                   | 1        |
| E7EVS6              | Actin, cytoplasmic 1;Actin, cytoplasmic 1, N-termina  | ACTB      | 2,600,000,000   | 74,816,000          | 1,747,800,000       | 140,870,000         | 230,680,000         | 217,870,000         | 187,980,000         | 19       |
| P01834              | Ig kappa chain C region                               | IGKC      | 2,165,500,000   | 19,359,000          | 221,050,000         | 1,391,900,000       | 195,150,000         | 232,100,000         | 105,920,000         | 9        |
| AOA286YFJ8          | Ig gamma-4 chain C region                             | IGHG4     | 1,609,600,000   | 0                   | 218,830,000         | 22,468,000          | 138,990,000         | 428,050,000         | 801,270,000         | 17       |
| P0DOY3              | Immunoglobulin lambda constant 3                      | IGLC3     | 1,591,000,000   | 2,681,900           | 60,706,000          | 741,050,000         | 302,850,000         | 240,510,000         | 243,250,000         | 9        |
| AOA286YEY1          | Ig alpha-1 chain C region                             | IGHA1     | 1,335,500,000   | 23,359,000          | 584,930,000         | 130,660,000         | 252,550,000         | 139,020,000         | 204,990,000         | 14       |
| Q9Y6R7              | IgGfC-binding protein                                 | FCGBP     | 1,098,700,000   | 9,162,000           | 128,730,000         | 9,654,400           | 38,684,000          | 824,150,000         | 88,293,000          | 30       |
| P01624              | Ig kappa chain V-III region POM                       | IGKV3D-15 | 1,060,200,000   | 0                   | 124,770,000         | 613,850,000         | 116,590,000         | 205,020,000         | 0                   | 2        |
| P31943              | Heterogeneous nuclear ribonucleoprotein H;Heteroç     | HNRNPH1   | 1,047,700,000   | 10,293,000          | 217,040,000         | 24,254,000          | 289,540,000         | 295,340,000         | 211,190,000         | 11       |
| P08670              | Vimentin                                              | VIM       | 951,490,000     | 6,378,400           | 298,510,000         | 5,089,400           | 72,211,000          | 358,520,000         | 210,780,000         | 26       |
| H0YEF7              | Phosphatidylinositol-binding clathrin assembly prote  | PICALM    | 874,480,000     | 16,602,000          | 212,520,000         | 57,324,000          | 467,540,000         | 68,277,000          | 52,211,000          | 14       |
| ES9QV5              | Coiled-coil domain-containing protein 37              | CCDC37    | 870,490,000     | 0                   | 0                   | 870,490,000         | 0                   | 0                   | 0                   | 1        |
| AOA4W8ZXM2          | Immunoglobulin heavy variable 3-72                    | IGHV3-72  | 808,240,000     | 44,918,000          | 282,930,000         | 12,296,000          | 137,660,000         | 204,230,000         | 126,190,000         | 3        |
| P05783              | Keratin, type I cytoskeletal 18                       | KRT18     | 760,020,000     | 0                   | 231,740,000         | 8,635,500           | 185,390,000         | 187,570,000         | 146,680,000         | 17       |
| P07355              | Annexin A2;Annexin;Putative annexin A2-like protei    | ANXA2     | 742,370,000     | 6,496,700           | 256,760,000         | 55,166,000          | 196,500,000         | 172,720,000         | 172,720,000         | 15       |
| P01871              | Ig mu chain C region                                  | IGHM      | 722,270,000     | 105,950,000         | 12,770,000          | 0                   | 95,422,000          | 155,950,000         | 352,180,000         | 18       |
| P31942-2            | Heterogeneous nuclear ribonucleoprotein H3            | HNRNPH3   | 681,640,000     | 0                   | 133,900,000         | 68,508,000          | 103,680,000         | 293,950,000         | 113,610,000         | 9        |
| Q8NDC0              | MAPK-interacting and spindle-stabilizing protein-like | MAPK1IP1L | 497,400,000     | 15,599,000          | 39,220,000          | 243,740,000         | 59,063,000          | 32,791,000          | 106,990,000         | 1        |
| P51512-2            | Matrix metalloproteinase-16                           | MMP16     | 429,540,000     | 0                   | 178,440,000         | 27,390,000          | 0                   | 223,720,000         | 0                   | 1        |
| H0Y8G5              | Heterogeneous nuclear ribonucleoprotein D0            | HNRNPD    | 409,120,000     | 0                   | 31,290,000          | 27,715,000          | 95,052,000          | 151,740,000         | 103,320,000         | 5        |
| E7ETU5              | RNA-binding motif, single-stranded-interacting prote  | RBMS1     | 391,920,000     | 5,970,500           | 68,667,000          | 17,784,000          | 143,760,000         | 44,979,000          | 110,760,000         | 7        |
| Q8WZ42              | Titin                                                 | TTN       | 387,820,000     | 0                   | 0                   | 0                   | 75,928,000          | 210,050,000         | 101,840,000         | 1        |
| P02675              | Fibrinogen beta chain;Fibrinopeptide B;Fibrinogen t   | FGB       | 348,580,000     | 0                   | 343,520,000         | 2,249,600           | 0                   | 0                   | 2,806,500           | 16       |
| AOA0D9SF16          | Methyl-CpG-binding domain protein 5                   | MBD5      | 346,080,000     | 0                   | 0                   | 0                   | 346,080,000         | 0                   | 0                   | 1        |
| Q14979-3            | Heterogeneous nuclear ribonucleoprotein D-like        | HNRNPD    | 334,140,000     | 4,097,000           | 84,425,000          | 6,682,100           | 92,722,000          | 38,095,000          | 108,120,000         | 6        |
| P98082              | Disabled homolog 2                                    | DAB2      | 308,620,000     | 30,904,000          | 53,571,000          | 22,044,000          | 29,573,000          | 79,395,000          | 93,129,000          | 8        |
| AOA286YEY4          | Ig gamma-2 chain C region                             | IGHG2     | 295,690,000     | 3,630,700           | 140,820,000         | 13,340,000          | 30,486,000          | 32,731,000          | 74,683,000          | 15       |
| P68871              | Hemoglobin subunit beta;LVV-hemorphin-7;Spinorp       | HBB       | 289,630,000     | 17,601,000          | 25,216,000          | 58,392,000          | 73,808,000          | 70,816,000          | 43,798,000          | 4        |
| P11021              | 78 kDa glucose-regulated protein                      | HSPA5     | 278,720,000     | 66,634,000          | 8,224,700           | 0                   | 44,577,000          | 12,509,000          | 146,770,000         | 14       |
| P04083              | Annexin A1;Annexin                                    | ANXA1     | 264,550,000     | 7,343,100           | 128,430,000         | 38,085,000          | 12,426,000          | 24,473,000          | 53,792,000          | 13       |
| P01594              | Ig kappa variable 1-33                                | IGKV1-33  | 258,450,000     | 2,181,900           | 6,309,800           | 167,650,000         | 34,900,000          | 29,177,000          | 18,233,000          | 2        |
| O43866              | CD5 antigen-like                                      | CD5L      | 258,210,000     | 0                   | 64,662,000          | 0                   | 27,301,000          | 135,430,000         | 30,812,000          | 5        |
| F8V32               | Lysozyme;Lysozyme C                                   | LYZ       | 201,490,000     | 13,865,000          | 0                   | 33,772,000          | 58,974,000          | 48,689,000          | 46,193,000          | 3        |
| P21980-2            | Protein-glutamine gamma-glutamyltransferase 2         | TGM2      | 182,780,000     | 21,051,000          | 6,206,000           | 155,520,000         | 0                   | 0                   | 0                   | 4        |
| P01615              | Immunoglobulin kappa variable 2D-28                   | IGKV2D-28 | 157,840,000     | 0                   | 0                   | 56,727,000          | 2,124,500           | 1,244,100           | 97,746,000          | 1        |
| Q5T749              | Keratinocyte proline-rich protein                     | KPRP      | 156,670,000     | 0                   | 14,536,000          | 42,583,000          | 12,523,000          | 41,980,000          | 45,045,000          | 8        |
| Q5T7N2              | LINE-1 type transposase domain-containing protein     | L1TD1     | 147,570,000     | 0                   | 33,515,000          | 51,668,000          | 0                   | 0                   | 62,386,000          | 2        |
| AOA6Q8PGK1          | Heat shock protein beta-1                             | HSPB1     | 140,170,000     | 5,102,400           | 5,175,100           | 116,740,000         | 0                   | 9,140,400           | 4,009,100           | 4        |
| Q02413              | Desmoglein-1                                          | DSG1      | 139,520,000     | 4,467,600           | 13,159,000          | 21,449,000          | 21,775,000          | 52,035,000          | 26,635,000          | 9        |
| F8VV89              | Tubulin alpha-1B chain;Tubulin alpha-1A chain;Tubi    | TUBA1B    | 130,470,000     | 4,960,800           | 53,076,000          | 11,800,000          | 10,998,000          | 17,150,000          | 32,482,000          | 4        |
| AOA6Q8PFJ0          | Prelamin-A/C;Lamin-A/C                                | LMNA      | 126,810,000     | 51,770,000          | 36,048,000          | 0                   | 9,173,200           | 5,398,800           | 24,420,000          | 7        |
| P69905              | Hemoglobin subunit alpha                              | HBA1      | 120,580,000     | 8,819,100           | 32,928,000          | 0                   | 19,697,000          | 31,037,000          | 28,103,000          | 3        |
| P02671              | Fibrinogen alpha chain;Fibrinopeptide A;Fibrinogen    | FGA       | 119,010,000     | 5,765,800           | 89,186,000          | 13,712,000          | 0                   | 1,589,500           | 8,753,800           | 6        |
| AOA0B4J231          | Immunoglobulin lambda-like polypeptide 5;Ig lambda    | IGLL5     | 113,780,000     | 0                   | 823,960             | 0                   | 51,884,000          | 45,566,000          | 15,503,000          | 7        |
| Q9HAU0-6            | Pleckstrin homology domain-6                          | PLEKHA6   | 100,890,000     | 0                   | 9,826,200           | 91,063,000          | 0                   | 0                   | 0                   | 1        |
| Q92945              | Far upstream element-binding protein 2                | KHSRP     | 96,813,000      | 25,823,000          | 0                   | 0                   | 5,257,900           | 16,437,000          | 49,295,000          | 8        |
| R4GNB1              | Acy-CoA synthetase family member 4                    | AASDH     | 94,959,000      | 0                   | 6,802,400           | 6,567,300           | 14,507,000          | 47,725,000          | 19,358,000          | 1        |
| C9JEU5              | Fibrinogen gamma chain                                | FGG       | 90,470,000      | 63,046,000          | 15,905,000          | 0                   | 10,380,000          | 0                   | 1,139,700           | 7        |
| P04406              | Glyceraldehyde-3-phosphate dehydrogenase              | GAPDH     | 89,398,000      | 4,504,400           | 74,117,000          | 3,593,000           | 1,898,700           | 5,284,800           | 0                   | 6        |
| K7ERX7              | ATP synthase subunit alpha, mitochondrial             | ATPSA1    | 87,648,000      | 0                   | 49,222,000          | 0                   | 0                   | 20,992,000          | 17,434,000          | 5        |
| E9PPG9              | mRNA export factor                                    | RAE1      | 87,447,000      | 0                   | 0                   | 0                   | 58,237,000          | 2,416,200           | 26,794,000          | 4        |
| P30101              | Protein disulfide-isomerase A3                        | PDI3A     | 86,682,000      | 0                   | 34,607,000          | 0                   | 0                   | 17,446,000          | 34,628,000          | 8        |
| K7EQ02              | DAZ-associated protein 1                              | DAZAP1    | 83,974,000      | 0                   | 11,234,000          | 0                   | 42,826,000          | 23,140,000          | 6,774,000           | 2        |
| Q01469              | Fatty acid-binding protein, epididmal                 | FABP5     | 79,112,000      | 0                   | 8,010,100           | 12,771,000          | 28,053,000          | 0                   | 30,278,000          | 1        |
| Q01085              | Nucleolysin TIAR;Nucleolysin TIA-1 isoform p40        | TIAL1     | 77,006,000      | 0                   | 15,592,000          | 0                   | 14,334,000          | 18,441,000          | 28,639,000          | 4        |
| P21397-2            | Amine oxidase [flavin-containing] A;Amine oxidase     | MAOA      | 76,723,000      | 0                   | 33,332,000          | 0                   | 16,437,000          | 0                   | 26,954,000          | 4        |
| A6NHN2              | Roquin-2                                              | RC3H2     | 74,367,000      | 0                   | 0                   | 50,159,000          | 0                   | 8,880,000           | 15,328,000          | 1        |
| P14866              | Heterogeneous nuclear ribonucleoprotein L             | HNRNPL    | 68,636,000      | 0                   | 0                   | 0                   | 0                   | 0                   | 68,636,000          | 7        |
| Q5JPU3              | Pyruvate dehydrogenase E1 component subunit alp       | PDK1A     | 66,908,000      | 0                   | 12,367,000          | 0                   | 31,262,000          | 13,254,000          | 10,024,000          | 3        |
| Q8IUC1              | Keratin-associated protein 11-1                       | KRTAP11-1 | 65,493,000      | 0                   | 18,492,000          | 28,950,000          | 0                   | 18,051,000          | 0                   | 3        |
| Q5JPS3              | Tubulin beta chain                                    | TUBB      | 64,164,000      | 3,856,400           | 37,532,000          | 2,310,200           | 7,223,200           | 4,449,300           | 8,792,800           | 1        |
| C9J210              | Arf-GAP domain and FG repeat-containing protein 1     | AGFG1     | 59,976,000      | 4,759,100           | 12,457,000          | 0                   | 18,719,000          | 24,041,000          | 1                   | 1        |
| P19474              | E3 ubiquitin-protein ligase TRIM21                    | TRIM21    | 58,811,000      | 0                   | 6,681,800           | 0                   | 0                   | 29,267,000          | 22,862,000          | 5        |
| D6R9P3              | Heterogeneous nuclear ribonucleoprotein A/B           | HNRNPAB   | 58,548,000      | 0                   | 7,571,700           | 2,186,500           | 9,640,700           | 28,004,000          | 11,145,000          | 4        |
| Q5T1M5              | FK506-binding protein 15                              | FKBP15    | 58,396,000      | 11,484,000          | 0                   | 0                   | 14,598,000          | 0                   | 32,314,000          | 4        |
| E9PGY2              | Dynein assembly factor 5, axonemal                    | DNAAF5    | 56,016,000      | 0                   | 0                   | 0                   | 20,626,000          | 25,326,000          | 10,064,000          | 1        |
| P63261              | Actin, cytoplasmic 2;Actin, cytoplasmic 2, N-termina  | ACTG1     | 55,103,000      | 0                   | 29,965,000          | 6,910,800           | 6,077,800           | 5,127,100           | 7,022,400           | 19       |
| Q9NZT1              | Calmodulin-like protein 5                             | CALML5    | 54,136,000      | 0                   | 7,928,200           | 10,694,000          | 0                   | 27,905,000          | 7,608,500           | 1        |
| C9JZN1              | Guanine nucleotide-binding protein (G(I)/G(S)/G(T) s  | GNB2      | 53,184,000      | 0                   | 0                   | 45,048,000          | 8,135,900           | 0                   | 0                   | 4        |
| AOA712YQK6          | 60 kDa heat shock protein, mitochondrial              | HSPD1     | 50,218,000      | 1,514,400           | 15,195,000          | 0                   | 15,571,000          | 6,895,200           | 11,042,000          | 3        |
| P31040-2            | Succinate dehydrogenase [ubiquinone] flavoprotein     | SDHA      | 49,094,000      | 0                   | 23,561,000          | 0                   | 3,205,300           | 15,958,000          | 6,369,600           | 5        |
| AOA712V2R3          | Heterogeneous nuclear ribonucleoprotein A3            | HNRNPA3   | 48,903,000      | 0                   | 15,655,000          | 0                   | 7,296,200           | 11,237,000          | 14,714,000          | 2        |
| Q8IWB6-3            | Inactive serine/threonine-protein kinase TEX14        | TEX14     | 48,249,000      | 0                   | 0                   | 0                   | 0                   | 21,743,000          | 26,507,000          | 1        |
| P68371              | Tubulin beta-4B chain;Tubulin beta-4A chain           | TUBB4B    | 48,032,000      | 0                   | 39,150,000          | 0                   | 4,137,600           | 0                   | 4,744,800           | 3        |
| H0YFX9              | Histone H2A;Histone H2A type 1-J;Histone H2A type     | H2AFJ     | 45,901,000      | 12,453,000          | 7,861,100           | 20,288,000          | 0                   | 0                   | 5,298,900           | 1        |
| Q8IUC0              | Keratin-associated protein 13-1;Keratin-associated p  | KRTAP13-1 | 44,512,000      | 0                   | 7,315,500           | 7,365,500           | 0                   | 29,831,000          | 0                   | 1        |
| AOA087WVQ6          | Clathrin heavy chain;Clathrin heavy chain 1           | CLTC      | 44,504,000      | 21,103,000          | 0                   | 0                   | 0                   | 0                   | 23,400,000          | 3        |
| P63267              | Actin, gamma-enteric smooth muscle;Actin, alpha s     | ACTG2     | 44,025,000      | 0                   | 23,112,000          | 0                   | 0                   | 8,310,000           | 12,603,000          | 12       |
| H7BJJ3              | Protein disulfide-isomerase A3                        | PDI3A     | 43,257,000      | 4,680,500           | 27,448,000          | 0                   | 0                   | 11,128,000          | 0                   | 3        |
| AOA0B4J1V1          | Ig heavy chain V-III region JON;Ig heavy chain V-III  | IGHV3-21  | 43,147,000      | 0                   | 9,064,600           | 2,411,600           | 0                   | 22,858,000          | 8,812,900           | 2        |
| H7C582              | Integrator complex subunit 1                          | INTS1     | 42,661,000      | 0                   | 0                   | 42,661,000          | 0                   | 0                   | 0                   | 1        |
| Q9BYR6              | Keratin-associated protein 3-3                        | KRTAP3-3  | 40,458,000      | 0                   | 40,458,000          | 0                   | 0                   | 0                   | 0                   | 2        |
| Q13151              | Heterogeneous nuclear ribonucleoprotein A0            | HNRNPA0   | 39,870,000      | 0                   | 0                   |                     |                     |                     |                     |          |

|            |                                                        |                |            |            |            |            |            |            |            |   |
|------------|--------------------------------------------------------|----------------|------------|------------|------------|------------|------------|------------|------------|---|
| A0A0G2JRN3 | Alpha-1-antitrypsin;Short peptide from AAT             | SERPINA1       | 28,649,000 | 1,644,400  | 2,510,900  | 10,667,000 | 8,084,300  | 1,831,300  | 3,911,300  | 2 |
| P31025     | Lipocalin-1;Putative lipocalin 1-like protein 1        | LCN1           | 28,552,000 | 0          | 0          | 2,845,200  | 0          | 6,027,100  | 19,679,000 | 2 |
| P07237     | Protein disulfide-isomerase                            | P4HB           | 28,383,000 | 0          | 18,574,000 | 0          | 0          | 4,970,100  | 4,837,900  | 3 |
| H0Y5H6     | Ubiquitin-associated protein 2-like                    | UBAP2L         | 25,709,000 | 0          | 0          | 0          | 0          | 8,179,400  | 17,530,000 | 1 |
| Q96CBB     | Integrator complex subunit 12                          | INTS12         | 25,627,000 | 0          | 0          | 0          | 0          | 25,627,000 | 0          | 1 |
| S4R460     | Ig heavy chain V-III region BRO region DOB             | IGHV3OR16-9    | 24,932,000 | 0          | 13,396,000 | 0          | 0          | 6,415,600  | 5,120,200  | 3 |
| Q5JQ06     | Alpha-catulin                                          | CTNNA1         | 23,896,000 | 0          | 0          | 17,301,000 | 0          | 6,594,900  | 0          | 1 |
| P07910     | Heterogeneous nuclear ribonucleoproteins C1/C2         | HNRNPC         | 23,699,000 | 0          | 15,502,000 | 0          | 8,197,000  | 0          | 0          | 2 |
| E9PEB5     | Far upstream element-binding protein 1                 | FUBP1          | 23,687,000 | 0          | 0          | 0          | 0          | 20,589,000 | 3,098,200  | 3 |
| Q07065     | Cytoskeleton-associated protein 4                      | CKAP4          | 23,211,000 | 0          | 10,484,000 | 0          | 0          | 7,232,200  | 5,495,600  | 5 |
| Q9UBG3     | Cornulin                                               | CRNN           | 23,063,000 | 0          | 0          | 23,063,000 | 0          | 0          | 0          | 3 |
| A0A0C4DH31 | Ig heavy chain V-I region V35                          | IGHV1-18       | 22,114,000 | 0          | 7,494,400  | 0          | 0          | 8,305,200  | 6,314,800  | 2 |
| P04843     | Dolichyl-diphosphooligosaccharide--protein glycosyl    | RPN1           | 21,647,000 | 0          | 6,872,300  | 0          | 2,481,300  | 3,898,300  | 8,395,600  | 3 |
| A0A0G2JIW1 | Heat shock 70 kDa protein 1A;Heat shock 70 kDa pi      | HSPA1A         | 21,113,000 | 1,946,300  | 16,283,000 | 0          | 0          | 2,883,300  | 0          | 4 |
| P11142-2   | Heat shock cognate 71 kDa protein                      | HSPA8          | 20,977,000 | 14,054,000 | 0          | 1,367,200  | 1,373,400  | 4,182,300  | 0          | 6 |
| Q15365     | Poly(rC)-binding protein 1;Poly(rC)-binding protein 3  | PCBP1          | 19,851,000 | 0          | 8,243,700  | 0          | 0          | 7,620,100  | 3,987,300  | 4 |
| P29401     | Transketolase                                          | TKT            | 19,791,000 | 2,617,800  | 17,173,000 | 0          | 0          | 0          | 0          | 3 |
| P11166     | Solute carrier family 2, facilitated glucose transport | SLC2A1         | 19,512,000 | 0          | 19,512,000 | 0          | 0          | 0          | 0          | 1 |
| MOR3F1     | Heterogeneous nuclear ribonucleoprotein U-like pro     | HNRNPUL1       | 19,055,000 | 0          | 0          | 0          | 0          | 0          | 19,055,000 | 4 |
| P69892     | Hemoglobin subunit gamma-2;Hemoglobin subunit 1        | HGB2           | 18,869,000 | 8,500,000  | 10,370,000 | 0          | 0          | 0          | 0          | 4 |
| A0A1Z1V416 | Heterogeneous nuclear ribonucleoproteins A2/B1         | HNRNPA2B1      | 18,704,000 | 0          | 0          | 0          | 0          | 12,162,000 | 6,541,300  | 4 |
| A0A5F9ZH78 | Arginase-1                                             | ARG1           | 17,366,000 | 0          | 4,850,200  | 0          | 0          | 5,206,700  | 7,309,200  | 2 |
| J3KPS3     | Fructose-bisphosphate aldolase;Fructose-bisphosph      | ALDOA          | 16,868,000 | 0          | 16,868,000 | 0          | 0          | 0          | 0          | 3 |
| A0A1Z1YQY2 | Heterogeneous nuclear ribonucleoprotein A1;Heterc      | HNRNPA1        | 16,360,000 | 2,149,600  | 2,573,000  | 0          | 7,993,500  | 3,644,300  | 0          | 1 |
| Q9BYQ3     | Keratin-associated protein 9-3                         | KRTAP9-3       | 16,191,000 | 0          | 16,191,000 | 0          | 0          | 0          | 0          | 2 |
| Q9BS26     | Endoplasmic reticulum resident protein 44              | ERP44          | 16,007,000 | 0          | 7,136,300  | 0          | 0          | 7,435,300  | 1,435,800  | 3 |
| P15924-2   | Desmoplakin                                            | DSP            | 15,924,000 | 0          | 0          | 6,126,800  | 0          | 9,797,400  | 0          | 5 |
| P05109     | Protein S100-A8;Protein S100-A8, N-terminally proc     | S100A8         | 15,760,000 | 828,670    | 4,227,300  | 10,704,000 | 0          | 0          | 0          | 1 |
| E9PMZ8     | T-lymphoma invasion and metastasis-inducing prot       | TIAM2          | 15,463,000 | 0          | 0          | 15,463,000 | 0          | 0          | 0          | 1 |
| P01833     | Polymeric immunoglobulin receptor;Secretory comp       | PIGR           | 15,458,000 | 0          | 11,036,000 | 0          | 0          | 3,208,000  | 1,214,700  | 3 |
| H3BQZ7     | Heterogeneous nuclear ribonucleoprotein U-like pro     | HNRNPUL2-BSCL2 | 15,173,000 | 1,669,300  | 0          | 0          | 0          | 0          | 13,503,000 | 2 |
| P55795     | Heterogeneous nuclear ribonucleoprotein H2             | HNRNP2H        | 14,987,000 | 0          | 4,489,200  | 0          | 1,825,300  | 5,079,900  | 3,592,900  | 5 |
| A0A0G2JPP1 | Keratin-associated protein 4-8                         | KRTAP4-8       | 14,521,000 | 0          | 14,521,000 | 0          | 0          | 0          | 0          | 1 |
| E9PHT9     | Annexin;Annexin A5                                     | ANXA5          | 12,946,000 | 0          | 0          | 12,946,000 | 0          | 0          | 0          | 2 |
| A0A6Q8PF87 | Apoptosis-inducing factor 1, mitochondrial             | AIFM1          | 12,539,000 | 0          | 12,539,000 | 0          | 0          | 0          | 0          | 1 |
| MOR1R1     | Serine/threonine-protein kinase PAK 4                  | PAK4           | 12,509,000 | 0          | 0          | 0          | 0          | 0          | 12,509,000 | 1 |
| P04040     | Catalase                                               | CAT            | 12,392,000 | 0          | 3,717,800  | 1,498,500  | 0          | 3,932,900  | 3,243,300  | 1 |
| A0A140TA58 | Keratin-associated protein 9-9;Keratin-associated pr   | KRTAP9-9       | 12,125,000 | 0          | 12,125,000 | 0          | 0          | 0          | 0          | 2 |
| A0A0A0MS98 | Band 3 anion transport protein                         | SLC4A1         | 12,063,000 | 2,108,100  | 0          | 0          | 3,363,800  | 0          | 6,591,400  | 1 |
| P0DP03     | Ig heavy chain V-II region CAM;Ig heavy chain V-II     | IGHV3-23       | 11,962,000 | 0          | 0          | 0          | 0          | 7,237,200  | 4,724,800  | 1 |
| P81605     | Dermcidin;Survival-promoting peptide;DCD-1             | DCD            | 11,727,000 | 0          | 0          | 7,387,600  | 0          | 4,338,900  | 0          | 2 |
| H0YFA4     | Cysteine-rich protein 2                                | CRIP2          | 11,648,000 | 0          | 0          | 7,587,800  | 4,060,200  | 0          | 0          | 2 |
| A0A3B1TD8  | Nuclear pore complex protein Nup98-Nup96;Nuclea        | NUP98          | 11,301,000 | 0          | 0          | 0          | 11,301,000 | 0          | 0          | 2 |
| P14625     | Endoplasmic                                            | HSP90B1        | 11,207,000 | 11,207,000 | 0          | 0          | 0          | 0          | 0          | 4 |
| Q96PK6     | RNA-binding protein 14                                 | RBM14          | 11,150,000 | 0          | 0          | 0          | 7,074,900  | 0          | 4,075,400  | 1 |
| E7ENL6     | Collagen alpha-3(VI) chain                             | COL6A3         | 10,671,000 | 10,671,000 | 0          | 0          | 0          | 0          | 0          | 3 |
| F8WBE5     | Transferrin receptor protein 1;Transferrin receptor p  | TFRC           | 10,642,000 | 3,853,100  | 0          | 0          | 0          | 0          | 6,788,600  | 1 |
| A0A0G2JMB2 | Ig alpha-2 chain C region                              | IGHA2          | 10,360,000 | 0          | 5,177,500  | 0          | 0          | 2,870,900  | 2,311,700  | 9 |
| A0A1Z1YQJ0 | Transitional endoplasmic reticulum ATPase              | VCP            | 10,078,000 | 10,078,000 | 0          | 0          | 0          | 0          | 0          | 2 |
| B3KVK2     | Guanine nucleotide-binding protein G(I)/G(S)/G(T) s    | GNB1           | 9,941,900  | 0          | 0          | 6,870,800  | 0          | 3,071,100  | 0          | 1 |
| Q9BYR3     | Keratin-associated protein 4-4                         | KRTAP4-4       | 9,925,900  | 0          | 9,925,900  | 0          | 0          | 0          | 0          | 1 |
| P52597     | Heterogeneous nuclear ribonucleoprotein F;Heterog      | HNRNPF         | 9,850,000  | 0          | 3,857,200  | 0          | 0          | 0          | 5,992,800  | 3 |
| P01024     | Complement C3;Complement C3 beta chain;C3-bet          | C3             | 9,848,400  | 0          | 9,848,400  | 0          | 0          | 0          | 0          | 2 |
| P80723-2   | Brain acid soluble protein 1                           | BASP1          | 9,527,100  | 0          | 0          | 0          | 0          | 0          | 9,527,100  | 2 |
| F8W1T6     | RNA-binding motif, single-stranded-interacting prote   | RBMS2          | 9,438,700  | 0          | 0          | 0          | 0          | 0          | 9,438,700  | 4 |
| P31944     | Caspase-14;Caspase-14 subunit p17, mature form;(       | CASP14         | 9,239,700  | 0          | 0          | 5,161,200  | 0          | 0          | 4,078,600  | 1 |
| P0DP08     | Ig heavy chain V-II region NEWM;Ig heavy chain V-      | IGHV4-4        | 9,180,400  | 0          | 0          | 0          | 0          | 5,589,100  | 3,591,300  | 1 |
| H3BU13     | Pyruvate kinase;Pyruvate kinase PKM                    | PKM            | 9,106,300  | 0          | 9,106,300  | 0          | 0          | 0          | 0          | 1 |
| F8WEU2     | ATP-dependent 6-phosphofructokinase, liver type        | PFKL           | 9,083,300  | 9,083,300  | 0          | 0          | 0          | 0          | 0          | 1 |
| A0A0C4DH25 | Immunoglobulin kappa variable 3D-20                    | IGKV3D-20      | 8,934,800  | 0          | 0          | 0          | 0          | 0          | 8,934,800  | 1 |
| P52907     | F-actin-capping protein subunit alpha-1                | CAPZA1         | 8,912,600  | 0          | 8,912,600  | 0          | 0          | 0          | 0          | 1 |
| I3L1P8     | Mitochondrial 2-oxoglutarate/malate carrier protein    | SLC25A11       | 8,767,800  | 0          | 0          | 8,767,800  | 0          | 0          | 0          | 1 |
| B4E3S0     | Coronin;Coronin-1C                                     | CORO1C         | 8,702,200  | 0          | 4,567,500  | 0          | 0          | 4,134,700  | 0          | 1 |
| F8W6D9     | Sentrin-specific protease 6                            | SEN6           | 8,679,600  | 0          | 0          | 0          | 0          | 0          | 8,679,600  | 2 |
| P36957-2   | Dihydropycollysine-residue succinyltransferase com     | DLST           | 8,276,700  | 0          | 5,934,900  | 0          | 0          | 0          | 2,341,800  | 1 |
| P31930     | Cytochrome b-c1 complex subunit 1, mitochondrial       | UQCRC1         | 8,234,200  | 0          | 3,957,100  | 0          | 0          | 0          | 4,277,000  | 2 |
| P02808     | Statherin                                              | STATH          | 8,064,100  | 0          | 0          | 8,064,100  | 0          | 0          | 0          | 1 |
| P16403     | Histone H1.2;Histone H1.3                              | HIST1H1C       | 7,889,100  | 0          | 2,483,600  | 5,405,500  | 0          | 0          | 0          | 3 |
| K7EMF8     | Very long-chain specific acyl-CoA dehydrogenase, r     | ACADVL         | 7,844,000  | 0          | 7,844,000  | 0          | 0          | 0          | 0          | 1 |
| C9JP00     | Muscleblind-like protein 1                             | MBNL1          | 7,830,800  | 0          | 0          | 0          | 0          | 2,369,000  | 5,461,800  | 1 |
| A0A6I8PIN8 | F-actin-capping protein subunit beta                   | CAPZB          | 7,662,300  | 0          | 0          | 6,785,600  | 0          | 876,710    | 0          | 1 |
| Q95205     | Muscleblind-like protein 2                             | MBLL           | 7,485,300  | 0          | 0          | 0          | 0          | 1,647,200  | 5,838,000  | 1 |
| A0A590UK99 | Deleted in malignant brain tumors 1 protein            | DMBT1          | 7,481,500  | 1,749,100  | 0          | 0          | 3,277,000  | 0          | 2,455,300  | 1 |
| P01766     | Ig heavy chain V-III region BRO                        | IGHV3-13       | 6,767,800  | 0          | 0          | 0          | 0          | 4,376,000  | 2,391,900  | 2 |
| J3KSH9     | Integrin beta-4                                        | ITGB4          | 6,700,000  | 0          | 0          | 0          | 0          | 0          | 6,700,000  | 1 |
| P55268     | Laminin subunit beta-2                                 | LAMB2          | 6,456,200  | 6,456,200  | 0          | 0          | 0          | 0          | 0          | 2 |
| P47929     | Galectin-7                                             | LGALS7         | 6,362,600  | 0          | 0          | 1,822,500  | 0          | 0          | 4,540,100  | 1 |
| E9PFG7     | 2-oxoglutarate dehydrogenase, mitochondrial            | OGDH           | 6,288,400  | 6,288,400  | 0          | 0          | 0          | 0          | 0          | 1 |
| ESRK69     | Annexin;Annexin A6                                     | ANXA6          | 6,072,900  | 0          | 0          | 0          | 0          | 0          | 6,072,900  | 2 |
| E7EQB2     | Lactotransferrin;Lactoferrin-H;Kaliocin-1;Lactoferr    | LF             | 6,032,800  | 0          | 3,762,400  | 2,270,400  | 0          | 0          | 0          | 3 |
| E9PRN7     | 3 beta-hydroxysteroid dehydrogenase/Delta 5-->4-is     | HSD3B1         | 5,960,500  | 0          | 5,960,500  | 0          | 0          | 0          | 0          | 1 |
| P17661     | Desmin                                                 | DES            | 5,939,400  | 0          | 5,939,400  | 0          | 0          | 0          | 0          | 5 |
| A0A087X0S5 | Collagen alpha-1(VI) chain                             | COL6A1         | 5,903,600  | 5,903,600  | 0          | 0          | 0          | 0          | 0          | 2 |
| P0DP09     | Immunoglobulin kappa variable 1-13                     | IGKV1D-13      | 5,730,000  | 0          | 0          | 5,730,000  | 0          | 0          | 0          | 1 |
| P62805     | Histone H4                                             | HIST1H4A       | 5,728,200  | 0          | 2,222,200  | 0          | 0          | 3,506,000  | 0          | 2 |
| Q8WVV4     | Protein POF1B                                          | POF1B          | 5,534,300  | 0          | 0          | 0          | 0          | 5,534,300  | 0          | 1 |
| A0A1W2PP22 | Heterogeneous nuclear ribonucleoprotein U              | HNRNPU         | 5,391,800  | 0          | 0          | 0          | 0          | 0          | 5,391,800  | 1 |
| Q9BW30     | Tubulin polymerization-promoting protein family me     | TPPP3          | 5,092,600  | 5,092,600  | 0          | 0          | 0          | 0          | 0          | 1 |
| P08572     | Collagen alpha-2(IV) chain;Canstatin                   | COL4A2         | 5,034,400  | 5,034,400  | 0          | 0          | 0          | 0          | 0          | 1 |
| A0A075B6K5 | Ig lambda chain V-III region LOI                       | IGLV3-9        | 5,025,200  | 0          | 0          | 2,660,600  | 0          | 0          | 2,364,600  | 1 |
| H0YJL6     | Ena/VASP-like protein                                  | EVL            | 4,998,300  | 0          | 0          | 4,998,300  | 0          | 0          | 0          | 1 |
| P59666     | Neutrophil defensin 3;HP 3-56;Neutrophil defensin 2    | DEFA3          | 4,545,800  | 0          | 0          | 0          | 0          | 4,545,800  | 0          | 1 |
| Q9NQP5     | Coagulation factor XIII A chain                        | F13A1          | 4,473,400  | 4,473,400  | 0          | 0          | 0          | 0          | 0          | 2 |
| E9PS23     | Cofilin-1                                              | CFL1           | 4,289,600  | 0          | 2,251,300  | 0          | 2,038,300  | 0          | 0          | 2 |
| B4DU11     | Estradiol 17-beta-dehydrogenase 1                      | HSD17B1        | 4,274,500  | 0          | 2,367,500  | 1,907,000  | 0          | 0          | 0          | 1 |
| C9J9S3     | Serine/threonine-protein phosphatase;Serine/threoo     | PPP1CB         | 4,214,000  | 0          | 0          | 1,916,400  | 0          | 0          | 2,297,500  | 1 |
| C9JHS9     | Vigilin                                                | HDLBP          | 4,198,300  | 0          | 0          | 0          | 1,536,900  | 0          | 2,661,400  | 1 |
| P05187     | Alkaline phosphatase, placental type;Alkaline phosph   | ALPP           | 4,169,700  | 0          | 0          | 0          | 0          | 0          | 4,169,700  | 2 |
| F8WEW2     | Actin-related protein 3                                |                |            |            |            |            |            |            |            |   |

|            |                                                     |           |           |           |           |           |           |           |           |   |
|------------|-----------------------------------------------------|-----------|-----------|-----------|-----------|-----------|-----------|-----------|-----------|---|
| P27824-3   | Calnexin                                            | CANX      | 3,444,400 | 0         | 0         | 0         | 0         | 0         | 3,444,400 | 1 |
| A0A3B3ISA6 | Complement C4-A;Complement C4 beta chain;Corr       | C4B       | 3,381,500 | 0         | 0         | 0         | 0         | 0         | 3,381,500 | 1 |
| A6NCI4-3   | von Willebrand factor A domain-containing protein 3 | VWA3A     | 3,185,200 | 0         | 0         | 0         | 3,185,200 | 0         | 0         | 1 |
| Q8WV48-5   | Coiled-coil domain-containing protein 107           | CCDC107   | 3,057,000 | 0         | 0         | 3,057,000 | 0         | 0         | 0         | 1 |
| Q00013-2   | 55 kDa erythrocyte membrane protein                 | MPP1      | 2,911,300 | 0         | 2,911,300 | 0         | 0         | 0         | 0         | 1 |
| Q14677     | Clathrin interactor 1                               | CLINT1    | 2,901,400 | 0         | 0         | 0         | 0         | 2,901,400 | 0         | 1 |
| A6NHR2     | 39S ribosomal protein L37, mitochondrial            | MRPL37    | 2,898,500 | 0         | 0         | 0         | 0         | 2,898,500 | 0         | 1 |
| P82663-3   | 8S ribosomal protein S25, mitochondrial             | MRPS25    | 2,580,800 | 0         | 0         | 0         | 0         | 0         | 2,580,800 | 1 |
| H7C4C8     | T-complex protein 1 subunit theta                   | CCT8      | 2,560,000 | 0         | 2,560,000 | 0         | 0         | 0         | 0         | 1 |
| P16401     | Histone H1.5                                        | HIST1H1B  | 2,527,600 | 0         | 0         | 2,527,600 | 0         | 0         | 0         | 1 |
| A0A3B3IT14 | Stress-70 protein, mitochondrial                    | HSPA9     | 2,413,000 | 2,413,000 | 0         | 0         | 0         | 0         | 0         | 1 |
| Q8TE68     | Epidermal growth factor receptor kinase substrate 8 | EPSL1     | 2,165,700 | 2,165,700 | 0         | 0         | 0         | 0         | 0         | 1 |
| Q8TDL5     | BPI fold-containing family B member 1               | BPIFB1    | 2,146,600 | 0         | 0         | 0         | 0         | 1,170,700 | 975,880   | 1 |
| P31146     | Coronin-1A                                          | CORO1A    | 2,123,800 | 0         | 0         | 0         | 0         | 2,123,800 | 0         | 1 |
| E9PSE0     | MAP kinase-interacting S/T-protein kinase 1         | MKNK1     | 1,976,500 | 0         | 0         | 0         | 1,976,500 | 0         | 0         | 1 |
| A0A1X7SBZ2 | Probable ATP-dependent RNA helicase DDX17           | DDX17     | 1,903,300 | 0         | 0         | 0         | 1,903,300 | 0         | 0         | 1 |
| M0R1B5     | Acetolactate synthase-like protein                  | ILVBL     | 1,702,000 | 0         | 1,702,000 | 0         | 0         | 0         | 0         | 1 |
| M0QX10     | Nuclear pore glycoprotein p62                       | NUP62     | 1,380,100 | 0         | 0         | 0         | 0         | 0         | 1,380,100 | 1 |
| P09525-2   | Annexin A4                                          | ANXA4     | 1,341,500 | 0         | 0         | 1,341,500 | 0         | 0         | 0         | 1 |
| O15400-2   | Syntaxin-7                                          | STX7      | 1,329,200 | 1,329,200 | 0         | 0         | 0         | 0         | 0         | 1 |
| H3BS21     | Haptoglobin;Haptoglobin alpha chain;Haptoglobin bi  | HP        | 1,311,500 | 0         | 1,311,500 | 0         | 0         | 0         | 0         | 2 |
| U3KQK0     | Histone H2B;Histone H2B type 1-L;Histone H2B typ    | HIST1H2BN | 1,266,700 | 0         | 1,266,700 | 0         | 0         | 0         | 0         | 1 |
| K7EJ44     | Profilin-1                                          | PFN1      | 1,249,400 | 0         | 0         | 0         | 0         | 1,249,400 | 0         | 1 |
| K7EK06     | Phenylalanine--tRNA ligase alpha subunit            | FARSA     | 1,246,700 | 0         | 1,246,700 | 0         | 0         | 0         | 0         | 1 |
| P10412     | Histone H1.4                                        | HIST1H1E  | 1,033,200 | 0         | 0         | 1,033,200 | 0         | 0         | 0         | 3 |
| A0A087WUX6 | Proteasomal ubiquitin receptor ADRM1                | ADRM1     | 993,900   | 0         | 993,900   | 0         | 0         | 0         | 0         | 1 |
| B1AUU8     | Epidermal growth factor receptor substrate 15       | EPS15     | 797,470   | 797,470   | 0         | 0         | 0         | 0         | 0         | 1 |
| O76041     | Nebulette                                           | NEBL      | 651,720   | 0         | 0         | 0         | 0         | 0         | 651,720   | 1 |

**Table 5**  
**Protein levels of MDMX (A), PICALM (B), OT-R (C) and V1aR (D) in 44 placental extracts.**  
 MDMX and PICALM values are relative to extract 01, and OT-R and V1aR values relative to sample V1. Replicate and mean values are shown.

| Patient | MDMX    |       |       |       | MEAN  |       |       |       |      |
|---------|---------|-------|-------|-------|-------|-------|-------|-------|------|
|         | % of 01 |       |       |       |       |       |       |       |      |
| H1      | 128.4   | 116.9 | 116.5 | 78.2  | 116.9 | 141.1 | 116.3 |       |      |
| H2      | 19.1    | 60.8  | 32.5  | 18.9  | 16.9  | 29.5  |       |       |      |
| H3      | 8.3     | 9.0   | 26.3  | 17.4  | 4.2   | 13.6  |       |       |      |
| I-1     | 128.8   | 299.0 | 114.6 | 222.2 | 102.8 | 146.1 | 183.9 |       |      |
| I-2     |         | 57.1  | 75.4  | 106.7 | 91.6  | 72.7  |       |       |      |
| I-3     | 123.6   | 72.5  | 77.1  | 94.1  | 37.8  | 71.7  | 77.8  |       |      |
| I-4     | 136.6   | 88.3  | 135.7 | 81.5  | 88.6  | 133.1 | 103.0 | 84.1  |      |
| J-1     |         |       |       | 118.1 | 130.2 | 119.1 | 122.5 |       |      |
| J-2     |         |       |       | 52.9  | 56.5  | 69.8  | 68.5  |       |      |
| J-3     |         |       |       | 84.0  | 60.8  | 66.2  | 70.3  |       |      |
| L-1     | 46.8    | 81.1  | 72.0  | 35.8  | 41.9  | 51.5  |       |       |      |
| L-2     |         |       |       | 62.3  | 55.2  | 31.0  | 44.2  |       |      |
| L-3     |         |       |       | 72.1  | 68.1  | 47.5  | 62.9  |       |      |
| L-4     |         |       |       | 119.9 | 23.9  | 16.2  | 8.9   | 18.3  |      |
| M1      |         |       |       | 67.2  | 57.5  | 28.7  | 62.4  | 51.7  |      |
| M3      |         |       |       | 76.8  | 37.2  | 67.0  |       |       |      |
| M4      |         |       |       | 60.1  | 40.8  | 42.1  | 66.7  | 52.9  |      |
| N1      | 68.1    | 40.8  | 42.1  | 68.7  | 101.6 | 101.6 | 115.8 |       |      |
| N2      | 10.2    | 31.0  | 45.5  | 58.0  | 58.2  | 6.6   | 34.9  |       |      |
| N3      | 75.3    | 167.8 | 85.8  | 80.4  | 68.0  | 85.5  |       |       |      |
| N4      | 58.8    | 52.8  | 46.4  | 48.7  | 54.4  |       |       |       |      |
| O1      |         |       |       | 57.5  | 34.5  | 46.1  | 101.6 | 49.8  | 67.9 |
| O2      |         |       |       | 78.4  | 82.8  | 34.4  | 86.6  | 70.3  |      |
| O3      | 77.3    | 58.3  | 22.3  | 42.5  | 11.0  | 8.6   | 38.7  |       |      |
| O4      |         |       |       | 72.9  | 24.9  | 34.5  | 25.4  | 111.4 | 63.6 |
| O5      |         |       |       | 244.4 | 229.0 | 145.1 |       | 206.1 |      |
| O7      |         |       |       | 167.2 | 175.6 | 163.3 | 170.0 |       |      |
| Q1      | 100.0   | 100.0 | 100.0 | 100.0 | 100.0 | 100.0 | 100.0 | 100.0 |      |
| Q2      |         |       |       | 205.4 | 156.5 | 144.9 | 181.2 |       |      |
| Q3      | 90.9    | 80.1  | 78.0  | 75.8  | 74.2  | 86.5  | 82.6  |       |      |
| Q4      | 50.5    | 89.2  | 28.6  | 45.6  | 62.7  | 31.5  | 50.8  |       |      |
| R3      | 28.2    | 99.6  | 57.5  | 20.0  | 60.2  | 77.0  | 54.5  |       |      |
| R4      | 126.7   | 116.9 | 93.8  | 58.6  | 109.0 | 101.3 |       |       |      |
| R5      |         |       |       | 33.6  | 78.8  | 49.8  | 54.1  |       |      |
| S1      |         |       |       | 207.4 | 128.9 | 161.4 | 162.8 |       |      |
| S2      |         |       |       | 202.5 | 107.1 | 110.4 | 140.0 |       |      |
| T1      | 124.8   | 161.9 | 150.5 | 124.5 | 141.7 |       |       |       |      |
| T2      |         |       |       | 115.0 | 91.3  | 62.9  | 96.4  |       |      |
| T3      |         |       |       | 119.7 | 87.7  | 103.7 | 103.7 |       |      |
| U2      |         |       |       | 163.0 | 175.0 | 122.9 | 153.6 |       |      |
| V1      |         |       |       | 75.4  | 71.1  | 21.0  | 55.9  |       |      |
| V2      |         |       |       | 82.8  | 72.9  | 89.0  | 88.2  |       |      |
| W1      |         |       |       | 99.2  | 72.4  | 84.0  | 85.2  |       |      |
| W2      |         |       |       | 261.5 | 197.7 | 173.8 | 211.0 |       |      |

| Patient | PICALM  |       |       |       | MEAN  |       |       |       |       |
|---------|---------|-------|-------|-------|-------|-------|-------|-------|-------|
|         | % of 01 |       |       |       |       |       |       |       |       |
| H1      |         |       |       | 21.3  | 31.8  | 34.7  | 29.3  |       |       |
| H2      |         |       |       | 32.8  | 31.2  | 55.6  | 38.9  |       |       |
| H3      |         |       |       | 126.3 | 114.0 | 164.0 | 120.6 | 131.2 |       |
| I-1     |         |       |       |       | 59.9  | 77.3  | 68.6  |       |       |
| I-2     |         |       |       |       | 64.9  | 78.8  | 71.8  |       |       |
| I-3     |         |       |       |       | 31.5  | 28.4  | 19.5  | 23.4  |       |
| I-4     |         |       |       | 18.7  | 14.2  | 2.0   | 2.9   | 8.4   |       |
| J-1     | 85.4    | 122.8 | 105.8 | 72.0  | 126.2 | 127.1 | 103.0 | 106.0 |       |
| J-2     |         |       |       | 30.9  | 21.9  | 21.6  | 41.0  | 38.6  |       |
| J-3     | 93.8    | 118.5 | 113.8 | 166.7 | 161.5 | 118.8 |       |       |       |
| L-1     |         |       |       | 95.2  | 122.6 | 227.4 | 127.2 | 145.1 |       |
| L-2     |         |       |       | 60.2  | 58.9  | 91.8  | 76.3  |       |       |
| L-3     |         |       |       | 100.2 | 102.2 | 142.1 | 94.5  | 108.7 |       |
| L-4     |         |       |       |       | 77.4  | 92.1  | 115.4 | 95.0  |       |
| M1      |         |       |       | 187.9 | 156.1 | 131.4 | 159.8 | 133.5 |       |
| M3      |         |       |       | 4.6   | 4.3   | 4.2   | 4.4   |       |       |
| M4      |         |       |       | 106.1 | 78.3  | 104.0 | 96.1  |       |       |
| N1      |         |       |       | 42.5  | 34.5  | 80.1  | 52.4  |       |       |
| N2      |         |       |       | 50.7  | 49.6  | 87.1  | 62.5  | 62.5  |       |
| N3      |         |       |       | 72.7  | 69.7  | 77.3  | 73.2  |       |       |
| N4      |         |       |       | 45.3  | 42.4  | 43.5  | 51.3  | 45.6  |       |
| O1      |         |       |       | 41.5  | 43.8  | 35.3  | 11.4  | 33.0  |       |
| O2      |         |       |       | 98.6  | 42.9  | 109.5 | 117.3 | 91.6  |       |
| O3      |         |       |       | 53.7  | 66.5  | 45.6  | 151.3 | 78.3  |       |
| O4      |         |       |       | 197.1 | 63.8  | 54.9  | 188.3 | 116.0 |       |
| O5      |         |       |       |       | 153.7 | 134.3 | 144.0 |       |       |
| O7      |         |       |       |       | 142.0 | 216.5 | 178.2 |       |       |
| Q1      | 100.0   | 100.0 | 100.0 | 100.0 | 100.0 | 100.0 | 100.0 | 100.0 |       |
| Q2      |         |       |       | 166.3 | 186.0 | 176.6 | 138.0 | 140.5 | 161.5 |
| Q3      |         |       |       | 115.3 | 136.5 | 138.3 | 130.7 |       |       |
| Q4      |         |       |       | 60.7  | 196.8 | 188.6 | 193.7 |       |       |
| R3      |         |       |       | 85.8  | 208.0 | 244.3 | 182.7 |       |       |
| R4      |         |       |       | 83.7  | 64.9  | 42.0  | 53.5  |       |       |
| R5      |         |       |       | 180.9 | 115.3 | 97.3  | 186.9 | 137.6 |       |
| S2      |         |       |       | 192.9 | 181.9 | 233.0 | 216.2 | 206.0 |       |
| T1      |         |       |       |       | 173.3 | 169.2 | 171.3 |       |       |
| T2      |         |       |       | 226.5 | 181.1 | 130.8 | 219.4 | 188.5 |       |
| U1      |         |       |       |       | 104.2 | 165.3 | 217.6 | 162.3 |       |
| U2      |         |       |       |       | 119.8 | 122.6 | 218.0 | 153.5 |       |
| V1      |         |       |       |       | 147.0 | 207.3 | 288.0 | 214.1 |       |
| V2      |         |       |       |       | 225.3 | 215.0 | 251.0 | 230.4 |       |
| W1      |         |       |       | 129.3 | 200.8 | 263.6 | 152.0 | 186.4 |       |
| W2      |         |       |       |       | 125.9 | 125.7 | 164.5 | 145.4 |       |

| Patient | OT-R    |       |       |       | MEAN  |       |       |       |       |
|---------|---------|-------|-------|-------|-------|-------|-------|-------|-------|
|         | % of V1 |       |       |       |       |       |       |       |       |
| H1      |         |       |       | 31.9  | 32.6  | 34.9  | 33.1  |       |       |
| H2      |         |       |       | 44.6  | 47.5  | 54.3  | 48.8  |       |       |
| H3      |         |       |       | 53.5  | 66.5  | 64.1  | 59.2  |       |       |
| I-1     |         |       |       | 45.9  | 44.5  | 43.4  | 44.8  |       |       |
| I-2     | 56.0    | 64.8  | 43.0  | 40.5  | 37.5  | 35.1  | 48.5  |       |       |
| I-3     |         |       |       | 43.3  | 42.7  | 29.3  | 32.2  | 36.9  |       |
| I-4     |         |       |       | 24.3  | 24.4  | 18.2  | 22.3  |       |       |
| J-1     |         |       |       | 78.0  | 66.2  | 80.9  | 83.8  | 77.2  |       |
| J-2     |         |       |       | 64.8  | 55.1  | 44.8  | 54.9  |       |       |
| J-3     | 74.2    | 64.0  | 62.4  | 73.1  | 67.1  | 72.2  |       |       |       |
| L-1     |         |       |       |       | 85.6  | 77.4  | 81.5  |       |       |
| L-2     |         |       |       | 84.2  | 80.5  | 86.5  | 92.2  | 96.1  |       |
| L-3     |         |       |       | 77.8  | 72.1  | 61.6  | 81.6  | 73.3  |       |
| L-4     |         |       |       | 79.0  | 70.5  | 82.2  | 82.3  | 78.5  |       |
| M1      |         |       |       | 42.2  | 37.9  | 41.8  | 41.0  |       |       |
| M3      |         |       |       | 22.0  | 22.3  | 21.1  | 18.9  | 21.1  |       |
| M4      |         |       |       | 87.8  | 42.3  | 45.7  | 48.6  |       |       |
| N1      |         |       |       | 73.8  | 61.4  | 84.1  | 80.0  | 76.3  |       |
| N2      |         |       |       | 75.7  | 80.6  | 78.6  | 78.3  |       |       |
| N3      |         |       |       | 102.2 | 95.9  | 108.0 | 102.0 |       |       |
| N4      |         |       |       | 56.3  | 55.7  | 75.5  | 65.9  | 61.1  |       |
| O1      |         |       |       | 40.0  | 61.6  | 46.1  | 43.1  | 47.7  |       |
| O2      |         |       |       | 81.7  | 86.7  | 90.1  | 85.8  |       |       |
| O3      |         |       |       | 87.0  | 77.0  | 90.8  | 83.7  | 82.1  |       |
| O4      | 80.8    | 81.2  | 84.9  | 80.8  | 87.9  | 87.7  |       |       |       |
| O5      |         |       |       | 100.2 | 85.9  | 89.7  | 95.0  | 92.7  |       |
| O7      |         |       |       | 97.1  | 71.1  | 78.7  | 72.4  |       |       |
| Q1      | 89.1    | 65.4  | 91.4  | 67.8  | 71.4  | 74.1  | 73.2  |       |       |
| Q2      |         |       |       | 83.4  | 102.4 | 103.9 | 119.0 | 104.7 |       |
| Q3      |         |       |       | 87.2  | 75.4  | 84.6  | 97.8  | 86.2  |       |
| Q4      |         |       |       | 80.3  | 78.4  | 83.4  | 82.1  | 91.3  |       |
| R4      |         |       |       | 108.7 | 98.1  | 116.1 | 118.3 | 110.8 |       |
| R5      |         |       |       | 102.9 | 89.2  | 116.9 | 118.2 | 116.5 | 108.9 |
| S2      |         |       |       | 120.1 | 104.1 | 112.7 | 128.4 | 119.7 | 117.4 |
| T1      |         |       |       | 118.7 | 112.9 | 127.8 | 122.0 | 120.4 |       |
| U1      |         |       |       | 84.5  | 86.8  | 75.1  | 126.9 | 103.6 | 91.4  |
| U2      |         |       |       | 107.0 | 101.2 | 117.9 | 112.0 | 109.5 |       |
| V1      | 100.0   | 100.0 | 100.0 | 100.0 | 100.0 | 100.0 | 100.0 | 100.0 | 100.0 |
| V2      | 111.0   | 100.6 | 104.7 | 117.9 | 114.4 | 109.7 |       |       |       |
| W1      |         |       |       | 102.8 | 113.8 | 121.5 | 118.2 | 113.9 |       |
| W2      |         |       |       | 82.1  | 107.5 | 101.6 | 115.0 | 98.9  | 102.6 |

| Patient | V1aR    |      |      |      | MEAN  |       |       |       |      |
|---------|---------|------|------|------|-------|-------|-------|-------|------|
|         | % of V1 |      |      |      |       |       |       |       |      |
| H1      |         |      |      |      | 27.0  | 46.7  | 36.9  |       |      |
| H2      |         |      |      |      | 51.5  | 62.7  | 70.4  | 61.5  |      |
| H3      |         |      |      |      | 73.0  | 73.0  | 73.0  |       |      |
| I-1     |         |      |      |      | 77.8  | 61.7  | 72.6  | 70.7  |      |
| I-2     |         |      |      |      |       | 51.4  | 86.5  | 53.9  |      |
| I-3     |         |      |      |      |       | 58.5  | 69.7  | 64.1  |      |
| I-4     |         |      |      |      |       | 56.4  | 67.2  | 61.8  |      |
| J-1     |         |      |      | 41.2 | 43.3  | 54.9  | 67.6  | 51.7  |      |
| J-2     |         |      |      |      |       | 55.3  | 42.6  | 49.8  |      |
| J-3     |         |      |      |      |       | 56.8  | 61.7  | 75.2  | 64.5 |
| L-1     |         |      |      | 43.6 | 57.5  | 63.6  | 67.0  | 57.9  |      |
| L-2     |         |      |      |      | 80.4  | 78.0  | 91.4  | 82.6  |      |
| L-3     |         |      |      |      | 87.9  | 87.8  | 88.6  | 91.5  |      |
| L-4     |         |      |      |      | 87.2  | 68.3  | 75.9  | 77.1  |      |
| M1      |         |      |      |      | 75.4  | 80.0  | 87.7  | 84.7  |      |
| M3      |         |      |      |      | 118.5 | 90.7  | 108.1 | 102.4 |      |
| M4      |         |      |      | 43.9 | 60.7  | 66.4  | 63.1  | 58.5  |      |
| N1      |         |      |      |      | 67.4  | 79.6  | 76.3  | 74.5  |      |
| N2      |         |      |      |      | 65.5  | 58.4  | 72.5  | 61.7  | 69.5 |
| N3      |         |      |      |      | 71.8  | 70.9  | 85.2  | 75.9  |      |
| N4      | 30.3    | 16.9 |      |      | 46.6  | 46.1  | 31.8  | 34.3  |      |
| O1      |         |      |      |      | 83.8  | 60.3  | 76.4  | 73.5  |      |
| O2      |         |      |      |      | 75.0  | 72.3  | 77.4  | 74.9  |      |
| O3      |         |      |      |      | 74.5  | 72.2  | 78.3  | 75.3  |      |
| O4      |         |      |      |      | 69.8  | 51.4  | 70.2  | 63.8  |      |
| O5      |         |      |      | 49.8 | 93.2  | 68.2  | 85.9  | 73.6  | 74.2 |
| O7      |         |      |      |      | 83.9  | 73.3  | 86.3  | 81.8  |      |
| Q1      |         |      |      |      | 88.8  | 62.7  | 88.3  | 78.1  | 84.9 |
| Q2      |         |      |      | 91.1 | 77.3  | 102.2 | 99.7  | 100.8 | 94.2 |
| Q3      |         |      |      |      | 71.5  | 62.4  | 66.2  | 66.7  |      |
| Q4      | 68.5    | 60.6 | 96.9 | 79.0 | 73.7  | 82.9  | 75.7  |       |      |
| R4      |         |      |      | 33.1 | 64.9  | 74.7  | 51.4  | 74.6  | 59.7 |
| R5      |         |      |      |      |       |       |       |       |      |

**Table 6**

**Regression coefficients from univariable analysis of MDMX protein band intensity (relative to internal reference individual Q1)**

| Covariate                                   | Regression Coefficient (95% CI) | P-value            |
|---------------------------------------------|---------------------------------|--------------------|
| Age                                         | 1.94 (-0.79, 4.67)              | 0.17               |
| Gravidity                                   | 9.66 (3.59, 15.70)              | $3 \times 10^{-3}$ |
| Gestational Age                             | -1.79 (-12.40, 8.86)            | 0.74               |
| Body Mass Index in Labor and Delivery Suite | 0.97 (-0.18, 2.13)              | 0.11               |
| Race                                        | (REF)                           |                    |
| White                                       | (REF)                           |                    |
| Black                                       | 22.20 (-14.85, 59.26)           | 0.24               |
| Asian                                       | -32.49 (-133.62, 68.64)         | 0.53               |
| Unknown                                     | -3.74 (-77.21, 69.73)           | 0.92               |
| Hispanic                                    | -0.66 (-37.72, 36.39)           | 0.97               |
| Preeclampsia                                | (REF)                           |                    |
| No                                          | (REF)                           |                    |
| Yes                                         | -44.13 (-71.63, -16.64)         | $3 \times 10^{-3}$ |
| Diabetes                                    | (REF)                           |                    |
| No                                          | (REF)                           |                    |
| Type II                                     | 47.63 (14.27, 90.00)            | $8 \times 10^{-3}$ |
| GDM                                         | 47.91 (5.51, 90.32)             | 0.03               |
| Mode of Delivery                            | (REF)                           |                    |
| SVD                                         | (REF)                           |                    |
| CD prior to onset of Labor                  | 56.16 (24.13, 88.18)            | $1 \times 10^{-3}$ |
| CD after onset of Labor                     | 34.80 (-4.46, 74.07)            | 0.09               |
| VBAC                                        | 5.55 (-85.70, 96.79)            | 0.91               |
| Neonate Sex                                 | (REF)                           |                    |
| Female                                      | (REF)                           |                    |
| Male                                        | 5.04 (-24.35, 34.43)            | 0.74               |
| Neonatal Weight (g)                         | 0.03 (0.01, 0.06)               | $3 \times 10^{-3}$ |

**Table 7**

**Regression coefficients from univariable analysis of PICALM protein band intensity (relative to internal reference individual Q1)**

| Covariate                                   | Regression Coefficient (95% CI)  | P-value            |
|---------------------------------------------|----------------------------------|--------------------|
| Age                                         | 3.68 (0.28, 7.08)                | 0.04               |
| Gravidity                                   | 7.64 (-0.68, 15.95)              | 0.08               |
| Gestational Age                             | 6.88 (-6.62, 20.37)              | 0.32               |
| Body Mass Index in Labor and Delivery Suite | 2.06 (0.66, 3.45)                | 6x10 <sup>-3</sup> |
| Race                                        | (REF)                            |                    |
| White                                       | (REF)                            |                    |
| Black                                       | 17.33 (-24.11, 60.77)            | 0.44               |
| Asian                                       | 17.49 (-101.07, 136.05)          | 0.77               |
| Unknown                                     | -75.81 (-161.94, 10.32)          | 0.09               |
| Hispanic                                    | -46.39 (-89.82, -2.95)           | 0.04               |
| Preeclampsia                                | (REF)                            |                    |
| No                                          | (REF)                            |                    |
| Yes                                         | -35.60 (-73.25, 2.04)            | 0.07               |
| Diabetes                                    | (REF)                            |                    |
| No                                          | (REF)                            |                    |
| Type II                                     | 23.28 (-23.57, 70.13)            | 0.34               |
| GDM                                         | 38.05 (-21.50, 97.60)            | 0.22               |
| Mode of Delivery                            | (REF)                            |                    |
| SVD                                         | (REF)                            |                    |
| CD prior to onset of Labor                  | 59.96 (19.24, 100.68)            | 6x10 <sup>-3</sup> |
| CD after onset of Labor                     | 5.69 (-44.23, 55.62)             | 0.82               |
| VBAC                                        | -50.27 (-166.29, 65.75)          | 0.40               |
| Neonate Sex                                 | (REF)                            |                    |
| Female                                      | (REF)                            |                    |
| Male                                        | 19.10 (-18.16, 56.37)            | 0.32               |
| Neonatal Weight (g)                         | 0.03 (7x10 <sup>-7</sup> , 0.06) | 0.06               |

**Table 8**

**Regression coefficients from univariable analysis of OT-R protein band intensity (relative to internal reference individual T1)**

| Covariate                                   | Regression Coefficient (95% CI)     | P-value |
|---------------------------------------------|-------------------------------------|---------|
| Age                                         | 1.56 (0.13, 2.99)                   | 0.04    |
| Gravidity                                   | 1.02 (-2.60, 4.64)                  | 0.58    |
| Gestational Age                             | 1.73 (-4.00, 7.45)                  | 0.56    |
| Body Mass Index in Labor and Delivery Suite | 0.55 (-0.07, 1.17)                  | 0.09    |
| Race                                        |                                     |         |
| White                                       | REF                                 | REF     |
| Black                                       | -10.77 (-30.15, 8.61)               | 0.28    |
| Asian                                       | -6.04 (-58.92, 46.85)               | 0.82    |
| Unknown                                     | -27.94 (-66.36, 10.49)              | 0.16    |
| Hispanic                                    | -19.53 (-38.90, -0.15)              | 0.06    |
| Preeclampsia                                |                                     |         |
| No                                          | REF                                 | REF     |
| Yes                                         | -15.28 (-31.12, 0.54)               | 0.07    |
| Diabetes                                    |                                     |         |
| No                                          | REF                                 | REF     |
| Type 2                                      | 24.16 (5.47, 42.85)                 | 0.02    |
| GDM                                         | 15.32 (-8.44, 39.07)                | 0.21    |
| Mode of Delivery                            |                                     |         |
| SVD                                         | REF                                 | REF     |
| CD prior to onset of Labor                  | 21.82 (4.09, 39.55)                 | 0.02    |
| CD after onset of Labor                     | 0.55 (-21.19, 22.29)                | 0.96    |
| VBAC                                        | -19.308 (-69.60, 31.44)             | 0.46    |
| Neonatal Sex                                |                                     |         |
| Female                                      | REF                                 | REF     |
| Male                                        | 8.56 (-7.11, 24.23)                 | 0.29    |
| Neonatal Weight (g)                         | 0.01 (8.36x10 <sup>-4</sup> , 0.03) | 0.04    |

**Table 9**

**Regression coefficients from univariable analysis of V1aR protein band intensity (relative to internal reference individual T1)**

| Covariate                                   | Regression Coefficient (95% CI)                      | P-value            |
|---------------------------------------------|------------------------------------------------------|--------------------|
| Age                                         | 0.63 (-0.30, 1.56)                                   | 0.19               |
| Gravidity                                   | 1.84 (-0.38, 4.07)                                   | 0.11               |
| Gestational Age                             | -0.72 (-4.34, 2.90)                                  | 0.70               |
| Body Mass Index in Labor and Delivery Suite | 0.20 (-0.20, 0.60)                                   | 0.34               |
| Race                                        |                                                      |                    |
| White                                       | REF                                                  | REF                |
| Black                                       | 7.77 (-4.51, 20.04)                                  | 0.22               |
| Asian                                       | -15.55 (-49.05, 17.94)                               | 0.37               |
| Unknown                                     | -13.74 (-38.07, 10.60)                               | 0.28               |
| Hispanic                                    | -0.24 (-12.52, 12.03)                                | 0.97               |
| Preeclampsia                                |                                                      |                    |
| No                                          | REF                                                  | REF                |
| Yes                                         | -5.17 (-15.46, 5.12)                                 | 0.33               |
| Diabetes                                    |                                                      |                    |
| No                                          | REF                                                  | REF                |
| Type 2                                      | 11.84 (-0.34, 24.03)                                 | 0.06               |
| GDM                                         | 7.67 (-7.82, 23.16)                                  | 0.34               |
| Mode of Delivery                            |                                                      |                    |
| SVD                                         | REF                                                  | REF                |
| CD prior to onset of Labor                  | 20.36 (10.58, 30.13)                                 | $6 \times 10^{-3}$ |
| CD after onset of Labor                     | -1.05 (-13.04, 10.93)                                | 0.86               |
| VBAC                                        | -9.60 (-18.26, 37.44)                                | 0.50               |
| Neonatal Sex                                |                                                      |                    |
| Female                                      | REF                                                  | REF                |
| Male                                        | -4.53 (-14.46, 5.40)                                 | 0.38               |
| Neonatal Weight (g)                         | $5 \times 10^{-3}$ ( $-3.00 \times 10^{-3}$ , 0.013) | 0.23               |



**Table 10**

**Regression coefficients from multivariable analysis of MDMX protein band intensity (relative to internal reference individual Q1)**

| Covariate                  | Regression Coefficient (95% CI) | P-value            |
|----------------------------|---------------------------------|--------------------|
| Gravidity                  | 7.19 (1.24, 13.14)              | 0.02               |
| Preeclampsia               |                                 |                    |
| No                         | (REF)                           |                    |
| Yes                        | -40.61 (-66.18, -15.04)         | 3x10 <sup>-3</sup> |
| Diabetes                   |                                 |                    |
| No                         | (REF)                           |                    |
| Type II                    | 20.10 (-16.80, 57.00)           | 0.29               |
| GDM                        | 31.20 (-8.81, 71.22)            | 0.14               |
| Mode of Delivery           |                                 |                    |
| SVD                        | (REF)                           |                    |
| CD prior to onset of Labor | 9.05 (-26.72, 44.83)            | 0.62               |
| CD after onset of Labor    | 27.22 (-8.08, 62.52)            | 0.14               |
| VBAC                       | -15.92 (-93.98, 62.13)          | 0.69               |
| Neonatal Weight (g)        | 0.01 (-0.01, 0.04)              | 0.37               |

**Table 11**

**Regression coefficients from multivariable analysis of PICALM protein band intensity (relative to internal reference individual Q1)**

| Covariate                                   | Regression Coefficient (95% CI) | P-value |
|---------------------------------------------|---------------------------------|---------|
| Age                                         | 1.73 (-1.64, 5.09)              | 0.32    |
| Body Mass Index in Labor and Delivery Suite | 1.35 (-0.07, 2.77)              | 0.07    |
| Mode of Delivery                            |                                 |         |
| SVD                                         | (REF)                           |         |
| CD prior to onset of Labor                  | 40.00 (-3.85, 83.85)            | 0.08    |
| CD after onset of Labor                     | 0.82 (-48.29, 49.93)            | 0.97    |
| VBAC                                        | -37.87 (-151.23, 75.48)         | 0.52    |

**Table 12**

**Regression coefficients from multivariable analysis of OT-R protein band intensity (relative to internal reference individual T1)**

| Covariate                  | Regression Coefficient (95% CI)     | P-value |
|----------------------------|-------------------------------------|---------|
| Age                        | 0.71 (-0.83, 2.35)                  | 0.39    |
| Diabetes                   |                                     |         |
| No                         | REF                                 | REF     |
| Type 2                     | 14.0 (-11.14, 37.70)                | 0.27    |
| GDM                        | 5.64 (-21.43, 32.00)                | 0.68    |
| Mode of Delivery           |                                     |         |
| SVD                        | REF                                 | REF     |
| CD prior to onset of Labor | 13.25 (-7.83, 34.33)                | 0.23    |
| CD after onset of Labor    | -1.04 (-23.92, 21.84)               | 0.93    |
| VBAC                       | -0.17 (-68.44, 34.32)               | 0.52    |
| Neonatal Weight (g)        | $4.05 \times 10^{-4}$ (-0.02, 0.02) | 0.96    |

**Table 13**

**Regression coefficients from bootstrapped replicates of univariable analysis of MDMX protein band intensity (relative to internal reference individual Q1)**

| Covariate                                   | (95% quantiles of point estimate from bootstrapped replicates) | Percentage of replicates <0.05 (95% quantiles of P-value) |
|---------------------------------------------|----------------------------------------------------------------|-----------------------------------------------------------|
| Age                                         | (0.43, 2.90)                                                   | 1.7% (0.05, 0.77)                                         |
| Gravidity                                   | (6.82, 12.15)                                                  | 95.5% ( $8 \times 10^{-4}$ , 0.06)                        |
| Gestational Age                             | (-6.88, 1.78)                                                  | 0% (0.25, 0.97)                                           |
| Body Mass Index in Labor and Delivery Suite | (0.60, 1.50)                                                   | 12.6% (0.03, 0.34)                                        |
| Race                                        |                                                                |                                                           |
| White                                       | (REF)                                                          |                                                           |
| Black                                       | (5.10, 39.4)                                                   | 0.9% (0.07, 0.80)                                         |
| Asian                                       | (-53.55, -6.43)                                                | 0% (0.33, 0.91)                                           |
| Unknown                                     | (-30.86, 17.09)                                                | 0% (0.46, 0.99)                                           |
| Hispanic                                    | (-19.69, 13.18)                                                | 0% (0.32, 0.99)                                           |
| Preeclampsia                                |                                                                |                                                           |
| No                                          | (REF)                                                          |                                                           |
| Yes                                         | (-54.91, -28.15)                                               | 91.2% ( $9 \times 10^{-4}$ , 0.08)                        |
| Diabetes                                    |                                                                |                                                           |
| No                                          | (REF)                                                          |                                                           |
| Type II                                     | (24.47, 60.41)                                                 | 60% ( $2 \times 10^{-3}$ , 0.23)                          |
| GDM                                         | (24.83, 67.47)                                                 | 44.8% ( $7 \times 10^{-3}$ , 0.30)                        |
| Mode of Delivery                            |                                                                |                                                           |
| SVD                                         | (REF)                                                          |                                                           |
| CD prior to onset of Labor                  | (38.96, 67.36)                                                 | 98.6% ( $5 \times 10^{-4}$ , 0.04)                        |
| CD after onset of Labor                     | (17.16, 55.75)                                                 | 15.5% (0.18, 0.46)                                        |
| VBAC                                        | (-25.22, 55.19)                                                | 0% (0.28, 0.99)                                           |
| Neonate Sex                                 |                                                                |                                                           |
| Female                                      | (REF)                                                          |                                                           |
| Male                                        | (-10.62, 15.81)                                                | 0% (0.32, 0.99)                                           |
| Neonatal Weight (g)                         | (0.02, 0.05)                                                   | 85.8% ( $3 \times 10^{-4}$ , 0.14)                        |

**Table 14**

**Regression coefficients from bootstrapped replicates of univariable analysis of PICALM protein band intensity (relative to internal reference individual Q1)**

| Covariate                                   | (95% quantiles of point estimate from bootstrapped replicates) | Percentage of replicates <0.05 (95% quantiles of P-value) |
|---------------------------------------------|----------------------------------------------------------------|-----------------------------------------------------------|
| Age                                         | (2.19, 5.17)                                                   | 41% ( $7.1 \times 10^{-3}$ , 0.27)                        |
| Gravidity                                   | (3.42, 11.80)                                                  | 22% (0.01, 0.46)                                          |
| Gestational Age                             | (1.82, 11.72)                                                  | 0.1% (0.11, 0.82)                                         |
| Body Mass Index in Labor and Delivery Suite | (1.41, 2.66)                                                   | 90% ( $8 \times 10^{-4}$ , 0.09)                          |
| Race                                        |                                                                |                                                           |
| White                                       | (REF)                                                          |                                                           |
| Black                                       | (-7.10, 40.07)                                                 | 0% (0.12, 0.97)                                           |
| Asian                                       | (-40.69, 111.00)                                               | 0% (0.9, 0.99)                                            |
| Unknown                                     | (-96.07, -53.30)                                               | 2% (0.05, 0.28)                                           |
| Hispanic                                    | (-64.85, -29.39)                                               | 40% (0.01, 0.24)                                          |
| Preeclampsia                                |                                                                |                                                           |
| No                                          | (REF)                                                          |                                                           |
| Yes                                         | (-52.30, -18.88)                                               | 20.3% (0.01, 0.37)                                        |
| Diabetes                                    |                                                                |                                                           |
| No                                          | (REF)                                                          |                                                           |
| Type II                                     | (2.82, 45.52)                                                  | 0.6% (0.08, 0.91)                                         |
| GDM                                         | (23.35, 56.54)                                                 | 0.6% (0.08, 0.51)                                         |
| Mode of Delivery                            |                                                                |                                                           |
| SVD                                         | (REF)                                                          |                                                           |
| CD prior to onset of Labor                  | (41.39, 79.89)                                                 | 88.5% ( $9 \times 10^{-4}$ , 0.08)                        |
| CD after onset of Labor                     | (-17.08, 31.02)                                                | 0% (0.26, 0.99)                                           |
| VBAC                                        | (-82.60, -27.18)                                               | 0% (0.22, 0.67)                                           |
| Neonate Sex                                 |                                                                |                                                           |
| Female                                      | (REF)                                                          |                                                           |
| Male                                        | (3.42, 35.19)                                                  | 0.3% (0.10, 0.84)                                         |
| Neonatal Weight (g)                         | (0.01, 0.05)                                                   | 35.1% ( $3 \times 10^{-3}$ , 0.40)                        |

**Table 15**

**Regression coefficients from bootstrapped replicates of univariable analysis of OT-R protein band intensity (relative to internal reference individual T1)**

| Covariate                                   | (95% quantiles of point estimate from bootstrapped replicates) | Percentage of replicates <0.05 (95% quantiles of P-value) |
|---------------------------------------------|----------------------------------------------------------------|-----------------------------------------------------------|
| Age                                         | (1.17, 2.01)                                                   | 54.7% (0.01, 0.14)                                        |
| Gravidity                                   | (0.15, 2.08)                                                   | 0% (0.29, 0.93)                                           |
| Gestational Age                             | (-0.00, 3.40)                                                  | 0% (0.26, 0.96)                                           |
| Body Mass Index in Labor and Delivery Suite | (0.34, 0.77)                                                   | 15% (0.02, 0.30)                                          |
| Race                                        |                                                                |                                                           |
| White                                       | REF                                                            | REF                                                       |
| Black                                       | (-17.36, -3.71)                                                | 0% (0.09, 0.74)                                           |
| Asian                                       | (-13.48, 1.09)                                                 | 0% (0.62, 0.99)                                           |
| Unknown                                     | (-33.74, -21.97)                                               | 0% (0.10, 0.30)                                           |
| Hispanic                                    | (-24.88, -14.18)                                               | 32% (0.02, 0.18)                                          |
| Preeclampsia                                |                                                                |                                                           |
| No                                          | REF                                                            | REF                                                       |
| Yes                                         | (-20.16, -10.62)                                               | 24% (0.02, 0.22)                                          |
| Diabetes                                    |                                                                |                                                           |
| No                                          | REF                                                            | REF                                                       |
| Type 2                                      | (17.21, 31.63)                                                 | 84% (0.00, 0.10)                                          |
| GDM                                         | (8.96, 22.63)                                                  | 1% (0.07, 0.48)                                           |
| Mode of Delivery                            |                                                                |                                                           |
| SVD                                         | REF                                                            | REF                                                       |
| CD prior to onset of Labor                  | (16.54, 27.71)                                                 | 83% (0.01, 0.09)                                          |
| CD after onset of Labor                     | (-5.28, 6.19)                                                  | 0% (0.57, 0.99)                                           |
| VBAC                                        | (-29.34, -2.46)                                                | 0% (0.27, 0.93)                                           |
| Neonatal Sex                                |                                                                |                                                           |
| Female                                      | REF                                                            | REF                                                       |
| Male                                        | (4.20, 13.13)                                                  | 0% (0.11, 0.62)                                           |
| Neonatal Weight (g)                         | (0.01, 0.02)                                                   | 49% (0.01, 0.17)                                          |

**Table 16**

**Regression coefficients from bootstrapped replicates of univariable analysis of V1aR protein band intensity (relative to internal reference individual T1)**

| Covariate                                   | (95% quantiles of point estimate from bootstrapped replicates) | Percentage of replicates <0.05 (95% quantiles of P-value) |
|---------------------------------------------|----------------------------------------------------------------|-----------------------------------------------------------|
| Age                                         | (0.17, 1.12)                                                   | 6% (0.03, 0.74)                                           |
| Gravidity                                   | (0.48, 3.04)                                                   | 14% (0.02, 0.71)                                          |
| Gestational Age                             | (-2.20, 0.98)                                                  | 0% (0.30, 0.98)                                           |
| Body Mass Index in Labor and Delivery Suite | (-0.03, 0.43)                                                  | 2% (0.07, 0.93)                                           |
| Race                                        |                                                                |                                                           |
| White                                       | REF                                                            | REF                                                       |
| Black                                       | (1.07, 14.58)                                                  | 3% (0.04, 0.88)                                           |
| Asian                                       | (-32.74, -3.26)                                                | 0% (0.09, 0.87)                                           |
| Unknown                                     | (-24.28, -1.85)                                                | 0% (0.09, 0.89)                                           |
| Hispanic                                    | (-7.10, 7.06)                                                  | 0% (0.26, 0.99)                                           |
| Preeclampsia                                |                                                                |                                                           |
| No                                          | REF                                                            | REF                                                       |
| Yes                                         | (-11.01, 0.40)                                                 | 2% (0.07, 0.94)                                           |
| Diabetes                                    |                                                                |                                                           |
| No                                          | REF                                                            | REF                                                       |
| Type 2                                      | (5.78, 19.09)                                                  | 23% ( $9 \times 10^{-3}$ , 0.41)                          |
| GDM                                         | (-4.01, 18.40)                                                 | 4% (0.04, 0.95)                                           |
| Mode of Delivery                            |                                                                |                                                           |
| SVD                                         | REF                                                            | REF                                                       |
| CD prior to onset of Labor                  | (14.50, 26.60)                                                 | 100% ( $4 \times 10^{-5}$ , $2 \times 10^{-2}$ )          |
| CD after onset of Labor                     | (-7.93, 5.70)                                                  | 0% (0.26, 0.99)                                           |
| VBAC                                        | (-7.09, 23.62)                                                 | 0% (0.16, 0.97)                                           |
| Neonatal Sex                                |                                                                |                                                           |
| Female                                      | REF                                                            | REF                                                       |
| Male                                        | (-9.92, 0.86)                                                  | 0% (0.11, 0.93)                                           |
| Neonatal Weight (g)                         | ( $1.0 \times 10^{-3}$ , $9.0 \times 10^{-3}$ )                | 2% (0.05, 0.82)                                           |

**Table 17**

**Regression coefficients from bootstrapped replicates of multivariable analysis of MDMX protein band intensity (relative to internal reference individual Q1)**

| Covariate                  | (95% quantiles of point estimate from bootstrapped replicates) | Percentage of replicates <0.05 (95% quantiles of P-value) |
|----------------------------|----------------------------------------------------------------|-----------------------------------------------------------|
| Gravity                    | (4.17, 9.81)                                                   | 44% (0.01, 0.28)                                          |
| Preeclampsia               |                                                                |                                                           |
| No                         | REF                                                            |                                                           |
| Yes                        | (-54.42, -22.05)                                               | 80% ( $1 \times 10^{-3}$ , 0.17)                          |
| Diabetes                   |                                                                |                                                           |
| No                         | (REF)                                                          |                                                           |
| Type II                    | (-7.15, 35.26)                                                 | 1% (0.10, 0.97)                                           |
| GDM                        | (7.02, 50.01)                                                  | 5% (0.04, 0.78)                                           |
| Mode of Delivery           |                                                                |                                                           |
| SVD                        | (REF)                                                          |                                                           |
| CD prior to onset of Labor | (-7.87, 27.66)                                                 | 0% (0.22, 0.98)                                           |
| CD after onset of Labor    | (7.62, 49.52)                                                  | 8% (0.03, 0.69)                                           |
| VBAC                       | (-45.98, 36.55)                                                | 0% (0.32, 0.86)                                           |
| Neonatal Weight (g)        | (-0.002, 0.03)                                                 | 2% (0.07, 0.96)                                           |



**Table 18**

**Regression coefficients from bootstrapped replicates of multivariable analysis of PICALM protein band intensity (relative to internal reference individual Q1)**

| Covariate                                   | (95% quantiles of point estimate from bootstrapped replicates) | Percentage of replicates <0.05 (95% quantiles of P-value) |
|---------------------------------------------|----------------------------------------------------------------|-----------------------------------------------------------|
| Age                                         | (0.09, 3.35)                                                   | 1% (0.07, 0.93)                                           |
| Body Mass Index in Labor and Delivery Suite | (0.55, 2.11)                                                   | 26% (0.008, 0.54)                                         |
| Mode of Delivery                            |                                                                |                                                           |
| SVD                                         | REF                                                            |                                                           |
| CD prior to onset of Labor                  | (17.36, 62.80)                                                 | 20% (0.02, 0.48)                                          |
| CD after onset of Labor                     | (-23.42, 26.23)                                                | 0% (0.31, 0.99)                                           |
| VBAC                                        | (-70.17, -12.72)                                               | 0% (0.29, 0.84)                                           |

**Table 19**

**Regression coefficients from bootstrapped replicates of multivariable analysis of OT-R protein band intensity (relative to internal reference individual T1)**

| Covariate                  | (95% quantiles of point estimate from bootstrapped replicates) | Percentage of replicates <0.05 (95% quantiles of P-value) |
|----------------------------|----------------------------------------------------------------|-----------------------------------------------------------|
| Age                        | (0.27, 1.17)                                                   | 0% (0.17, 0.76)                                           |
| Diabetes                   |                                                                |                                                           |
| No                         | REF                                                            | REF                                                       |
| Type 2                     | (6.09, 21.30)                                                  | 0% (0.10, 0.65)                                           |
| GDM                        | (-1.66, 14.21)                                                 | 0% (0.32, 0.99)                                           |
| Mode of Delivery           |                                                                |                                                           |
| SVD                        | REF                                                            | REF                                                       |
| CD prior to onset of Labor | (7.33, 19.97)                                                  | 0% (0.09, 0.51)                                           |
| CD after onset of Labor    | (-6.97, 4.89)                                                  | 0% (0.55, 0.99)                                           |
| VBAC                       | (-27.20, -0.44)                                                | 0% (0.32, 0.98)                                           |
| Neonatal Weight (g)        | ( $-4 \times 10^{-3}$ , $5 \times 10^{-3}$ )                   | 0% (0.52, 0.99)                                           |

**Table 20**

**Autoantigens listed by Neiman et al. among the proteins in VEGFR2, MDMX, and PICALM immunoprecipitations (IP).**

|                  | <b>Uniprot</b> | <b>Gene</b> | <b>Protein name</b>                            | <b>Autoimmune disease</b>                        |                                                |
|------------------|----------------|-------------|------------------------------------------------|--------------------------------------------------|------------------------------------------------|
| <b>VEGFR2 IP</b> | P01023         | A2M         | Alpha-2-macroglobulin (Alpha-2-M)              | Sjögren's syndrome                               |                                                |
|                  | E7EVS6         | ACTB        | Actin, cytoplasmic 1 (Beta-actin)              | Autoimmune hemolytic anemia                      |                                                |
|                  | P07355         | ANXA2       | Annexin A2 (Annexin II) (Annexin-2)            | Antiphospholipid syndrome                        |                                                |
|                  | P08758         | ANXA5       | Annexin A5 (Anchoring CII)                     | Antiphospholipid syndrome                        |                                                |
|                  | P11182         | DBT         | Lipoamide acyltransferase BCOADC-E2            | Primary biliary cholangitis                      |                                                |
|                  | P17661         | DES         | Desmin                                         | Sjögren's syndrome                               |                                                |
|                  | P10515         | DLAT        | PDC-E2                                         | Primary biliary cirrhosis                        |                                                |
|                  | Q02413         | DSG1        | Desmoglein-1                                   | Pemphigus foliaceus                              |                                                |
|                  | P19474         | TRIM21      | E3 ubiquitin-protein ligase TRIM21             | Sjögren's syndrome; Systemic Lupus Erythematosus |                                                |
|                  | Q8WZ42         | TTN         | Titin                                          | Myasthenia gravis                                |                                                |
|                  | P08670         | VIM         | Vimentin                                       | Rheumatoid arthritis                             |                                                |
|                  | <b>MDMX IP</b> | P01023      | A2M                                            | Alpha-2-macroglobulin (Alpha-2-M)                | Sjögren's syndrome                             |
|                  |                | P68133      | ACTA1                                          | Actin, alpha skeletal muscle                     | Autoimmune hemolytic anemia; myasthenia gravis |
| P07355           |                | ANXA2       | Annexin A2 (Annexin II) (Annexin-2)            | Antiphospholipid syndrome                        |                                                |
| P08758           |                | ANXA5       | Annexin 5                                      | Antiphospholipid syndrome                        |                                                |
| P11182           |                | DBT         | Lipoamide acyltransferase BCOADC-E2            | Primary biliary cirrhosis                        |                                                |
| Q6P0N6           |                | DST         | Dystonin                                       | Bullous pemphigoid                               |                                                |
| P06733           |                | ENO1        | $\alpha$ -Enolase                              | Multiple sclerosis                               |                                                |
| P35579           |                | MYH9        | Myosin-9                                       | Multiple sclerosis                               |                                                |
| P08559           |                | PDHA1       | Pyruvate dehydrogenase E1-A type 1             | Primary biliary cholangitis                      |                                                |
| P21980           |                | TGM2        | Isopeptidase TGM2                              | Celiac's disease                                 |                                                |
| Q08188           |                | TGM3        | Transglutaminase-3                             | Dermatitis herpetiformis                         |                                                |
| P29401           |                | TKT         | Transketolase                                  | Multiple sclerosis                               |                                                |
| P19474           |                | TRIM21      | E3 ubiquitin-protein ligase TRIM21             | Sjögren's syndrome; Systemic Lupus Erythematosus |                                                |
| P18206           |                | VCL         | Vinculin                                       | Myasthenia gravis                                |                                                |
| <b>PICALM IP</b> |                | P01023      | A2M                                            | Alpha-2-macroglobulin (Alpha-2-M)                | Sjögren's syndrome                             |
|                  | E7EVS6         | ACTB        | Actin, cytoplasmic 1 (Beta-actin)              | Autoimmune hemolytic anemia                      |                                                |
|                  | P63261         | ACTG1       | Actin, cytoplasmic 2/ $\gamma$ -actin          | Autoimmune hemolytic anemia; myasthenia gravis   |                                                |
|                  | P63267         | ACTG2       | Alpha-actin-2                                  | Autoimmune hemolytic anemia; myasthenia gravis   |                                                |
|                  | P07355         | ANXA2       | Annexin A2 (Annexin II) (Annexin-2)            | Antiphospholipid syndrome                        |                                                |
|                  | P08758         | ANXA5       | Annexin A5 (Anchoring CII)                     | Antiphospholipid syndrome                        |                                                |
|                  | P17661         | DES         | Desmin                                         | Sjögren's syndrome                               |                                                |
|                  | P36957         | DLST        | 2-oxoglutarate dehydrogenase E2                | Pernicious anemia                                |                                                |
|                  | Q08554         | DSC1        | Desmocollin-1                                  | IgA pemphigus                                    |                                                |
|                  | Q02413         | DSG1        | Desmoglein-1                                   | Pemphigus foliaceus                              |                                                |
|                  | Q9Y285         | FARSA       | Phenylalanyl-tRNA synthetase $\alpha$ -subunit | Schizophrenia                                    |                                                |
|                  | Q02218         | OGDH        | 2-oxoglutarate dehydrogenase E1                | Pernicious anemia                                |                                                |
|                  | Q5JPU3         | PDHA1       | Pyruvate dehydrogenase E1-A type 1             | Primary biliary cholangitis                      |                                                |
|                  | P21980         | TGM2        | Isopeptidase TGM2                              | Celiac's disease                                 |                                                |
|                  | P29401         | TKT         | Transketolase                                  | Multiple sclerosis                               |                                                |
|                  | P19474         | TRIM21      | E3 ubiquitin-protein ligase TRIM21             | Sjögren's syndrome; Systemic Lupus Erythematosus |                                                |
|                  | Q13263         | TRIM28      | E3 SUMO-protein ligase TRIM28                  | Myositis                                         |                                                |
|                  | Q8WZ42         | TTN         | Titin                                          | Myasthenia gravis                                |                                                |
|                  | P08670         | VIM         | Vimentin                                       | Rheumatoid arthritis                             |                                                |

**Table 21**

Patient demographics

| Clinical characteristics           | Study subjects (n=44) | % of n |
|------------------------------------|-----------------------|--------|
| <b>Maternal Age</b>                |                       |        |
| 18-34                              | 40                    | 91%    |
| ≥35                                | 4                     | 9%     |
| <b>BMI</b>                         |                       |        |
| Underweight (<18.5)                | 0                     | 0%     |
| Normal (18.5-24.9)                 | 3                     | 7%     |
| Overweight (25-29.9)               | 9                     | 20%    |
| Obesity I (30-34.9)                | 12                    | 27%    |
| Obesity II (35-35.9)               | 5                     | 11%    |
| Extreme Obesity (≥40)              | 15                    | 34%    |
| <b>Parity</b>                      |                       |        |
| Nulliparous                        | 11                    | 25%    |
| Multiparous                        | 33                    | 75%    |
| <b>Gestational Age at Delivery</b> |                       |        |
| < 37 weeks                         | 4                     | 9%     |
| ≥ 37 weeks                         | 40                    | 91%    |
| <b>Race</b>                        |                       |        |
| White                              | 17                    | 39%    |
| African American                   | 12                    | 27%    |
| Hispanic                           | 12                    | 27%    |
| Other                              | 3                     | 7%     |
| <b>Diabetes</b>                    |                       |        |
| Type 1                             | 0                     | 0%     |
| Type 2                             | 9                     | 20%    |
| Gestational                        | 5                     | 11%    |
| Chronic Hypertension               | 6                     | 14%    |
| Normotensive                       | 28                    | 64%    |
| Preeclampsia                       | 16                    | 36%    |
| Preeclampsia and Diabetes          | 4                     | 9%     |
